# Supplementary material for: A Proteomics-Based Approach Identifies the NEDD4 Adaptor NDFIP2 as an Important Regulator of Ifitm3 Levels
Source: Viruses. 2023 Sep 26;15(10):1993. doi: 10.3390/v15101993 (PMC10611234; doi:10.3390/v15101993)
Supplement: Supplementary file 1 [file viruses-15-01993-s001.zip › Table S1.xlsx]

## Sheet: Proteomic Dataset
Table S1 - MS based quantitative proteomic comparison of exosomal vesicles form cells expressing or not Flag-IFITM3.
Majority protein IDs	Protein names	Gene names	Mol. weight [kDa]	Razor + unique peptides	IFITM3 Vs Ctrl		log2(normalized and imputed iBAQs
					p-value	log2 (Fold Change)	Ctrl R1	Ctrl R2	Ctrl R3	IFITM3 R1	IFITM3 R2	IFITM3 R3
E9PS44		IFITM3	12.255	6	4.98671e-07	10.6017	18.319	17.902	17.4783	28.7145	27.4534	29.3364			Enriched in IFITM3 vesicles
Q6IAX2;Q59GK9;P46778;G3V1B3;M0R181	60S ribosomal protein L21	RPL21	18.565	4	5.63214e-05	7.67111	12.1536	12.5153	12.6097	21.5143	18.071	20.7067			Enriched in Ctrl vesicles
P39023;B3KS36;Q8TBW1;Q9NY85;G5E9G0;Q96QL0;B5MCW2;Q49AJ9;Q9BT63;H7C422;H7C3M2	60S ribosomal protein L3	RPL3;rpl3	46.108	13	0.000449866	6.51751	15.8128	12.5153	15.271	22.5376	20.7241	19.89
D3YTB1;A0A024R2G7;F8W727;P62910	60S ribosomal protein L32	RPL32	15.616	4	1.52179e-05	6.19697	13.7553	12.5153	12.6097	19.9395	18.5394	18.9924
K7EM09;K7EPR0;K7ELQ9;A0A024R7D3;Q6UW68	Transmembrane protein 205	TMEM205;UNQ501	13.389	2	0.00020309	6.16884	12.1536	12.5153	12.6097	20.0805	19.0617	16.643
H0YLP6;H0YMF4;H0YKD8;P46779-4;P46779-5;P46779;P46779-2;P46779-3;Q59F34	60S ribosomal protein L28	RPL28	9.657	2	0.00442815	5.91522	12.1536	12.5153	17.7655	20.1514	19.8279	20.2008
H7C5F7;B4DLX2;B4DGY6;A0A0C4DGW0;Q9NV92	NEDD4 family-interacting protein 2	NDFIP2	15.727	2	3.5761e-06	5.69882	12.1536	12.5153	12.6097	18.4511	17.7698	18.1542
E9PPH5;Q53F20;Q9BTT0-3;Q9BTT0	Acidic leucine-rich nuclear phosphoprotein 32 family member E	ANP32E	13.128	3	0.000270524	5.54866	15.1604	12.5153	12.6097	19.2783	19.4652	18.1879
H0YN88;A0A075B716;P08708;H0YN73;A4D1Q6	40S ribosomal protein S17	RPS17;LOC392101	15.919	2	3.74887e-05	5.48957	12.1536	12.5153	12.6097	16.7768	18.3611	18.6095
E7ETK0;A0A087WUS0;P62847-2;P62847-3;P62847;P62847-4	40S ribosomal protein S24	RPS24	15.197	4	0.00173968	5.20276	14.075	16.7279	17.8275	22.7338	20.8799	20.6249
Q6P2E9;Q6P2E9-2	Enhancer of mRNA-decapping protein 4	EDC4	151.66	16	0.000787653	5.07278	12.1712	13.3661	10.9571	17.759	18.3019	15.6518
K7EJH3;A0A1B0GW87;K7EJM7;M0QYK5;Q69YM7;M0R2N4;P0DN76;B5BU08;Q01081-3;Q8WU68-3;Q8WU68-2;Q8WU68;Q01081-2;Q01081	Splicing factor U2AF 35 kDa subunit;Splicing factor U2AF 26 kDa subunit	U2AF1L4;DKFZp313J1712;U2AF1	3.8602	2	0.000207241	4.99692	12.1536	12.5153	12.6097	18.5671	17.7358	15.9665
P62424;Q9BY74;Q5T8U2;Q5T8U3	60S ribosomal protein L7a	RPL7A;RP-L7a	29.995	11	0.00359776	4.75865	15.0673	17.7997	19.3529	23.252	21.6519	21.5919
Q2L6I2;Q8NE71-2;Q8NE71;Q59F96;H0YGW7	ATP-binding cassette sub-family F member 1	ABCF1	91.679	9	0.000112664	4.64661	12.205	11.2115	12.2513	17.1319	16.9105	15.5653
Q9Y3U8;J3QSB5;J3KTD3	60S ribosomal protein L36	RPL36	12.254	4	0.00376131	4.61765	15.5486	16.245	19.4406	22.7728	21.5388	20.7755
M0QYR1;A8KAQ5;A0A024QZD5;P08621-3;P08621-2;P08621	U1 small nuclear ribonucleoprotein 70 kDa	SNRNP70;SNRP70	11.476	2	7.51469e-05	4.61645	12.1536	12.5153	12.6097	17.9106	16.1664	17.051
Q6NZ55;A8K4C8;P26373;P26373-2;J3QSB4	60S ribosomal protein L13	RPL13	24.265	6	0.00391566	4.59258	15.336	18.4228	19.5396	23.0603	22.4986	21.5173
O60747;Q8N4P8;Q53GS0;D2CFK9;Q9BZE4;Q9BZE4-2;Q5T3R7;B4DHR2;Q9BZE4-3	Nucleolar GTP-binding protein 1	GTPBP4	65.416	8	0.000441499	4.52886	12.1536	12.5153	12.6097	17.709	17.7923	15.3639
A0A024RB14;P62854;Q75MH1;Q5JNZ5	40S ribosomal protein S26;Putative 40S ribosomal protein S26-like 1	RPS26;RPS26P11	13.015	3	0.00316974	4.44831	17.1515	16.3842	19.9861	23.3598	21.4985	22.0085
A8K548;Q8IZL8;C9JFV4;B4DR36;E7EV54;B4DEX7;O15451;I3L445	Proline-, glutamic acid- and leucine-rich protein 1	PELP1	119.64	6	0.000148368	4.40081	12.348	10.8142	11.9213	16.1923	16.6718	15.4219
Q5JR94;P62241;Q5JR95;Q9BS10	40S ribosomal protein S8	RPS8	24.205	13	0.00193544	4.39373	18.0902	19.4415	21.5215	24.8703	23.9497	23.4144
E7EQV9;A0A024R2Q4;P61313;E7ENU7;E7EX53	Ribosomal protein L15;60S ribosomal protein L15	RPL15	20.51	6	0.000955914	4.37999	16.483	17.4952	19.0528	23.0479	21.9362	21.1867
A0A087WXM6;J3QQT2;J3KRX5;A0A024R261;A0A0A6YYL6;P18621;P18621-3;J3KRB3;A0A087WWH0;J3QS96;J3QLC8;A0A0A0MRF8;P18621-2;A0A087WY81	60S ribosomal protein L17	RPL17;hCG_24487;RPL17-C18orf32	19.586	5	6.01751e-05	4.25624	16.1131	16.2624	16.4337	21.2623	19.9356	20.38
Q5QTS3;Q53H34;P40429;Q9BSQ6;M0QYS1;Q8J015	60S ribosomal protein L13a	RPL13A;RPL13a	23.662	5	0.00057301	4.24878	16.3299	17.9928	18.7201	22.3945	22.1275	21.2671
E9PQD7;Q3KQT6;P15880;H0YEN5;Q8J014;Q6IPX5;Q8N5L9;Q9BSW5;O60249	40S ribosomal protein S2	RPS2;rps2	25.211	8	0.00082842	4.2359	16.5329	17.0506	19.1733	22.0309	21.277	22.1567
U3KQC1;A0A0A0MQU0;Q9BV38;K7EIR0	WD repeat-containing protein 18	WDR18	43.237	4	0.000622664	4.21703	12.1536	12.8111	14.5239	17.1	18.0917	16.9481
M0R3D6;M0R1A7;M0R117;B4DM74;B2R4C0;Q02543;Q32XH3;B4DM94;B4DUV3;Q53HD3;M0R0P7	60S ribosomal protein L18a	RPL18A	16.714	6	0.000350376	4.20315	15.763	17.4558	17.8703	21.6835	20.9821	21.033
Q9NT62;Q9NT62-2	Ubiquitin-like-conjugating enzyme ATG3	ATG3	35.864	3	0.000155192	4.18393	12.1536	12.5153	12.6097	16.2188	15.9697	17.6419
H0YCQ8;Q7L2H7-2;Q7L2H7	Eukaryotic translation initiation factor 3 subunit M	EIF3M	25.092	3	0.000533855	4.14653	14.3444	12.5153	12.6097	16.4082	17.7882	17.7125
A0A087X0X3;P52272-2;P52272;Q7KYM9;Q59ES8	Heterogeneous nuclear ribonucleoprotein M	HNRNPM;ORF	77.569	19	0.000515212	4.13913	14.3057	13.9927	15.6832	19.0091	19.5797	17.8102
A0A087WX29;B4DRW3;A0A0A0N0L3;A0A024R4E2;Q13148;A0A087WXQ5;K7EJM5;A0A087WV68;A0A0A0N0N3;A0A0A0N0M3;K7EN94;B1AKP7;G3V162;A0A087X260;A0A087WYY0;Q13148-4	TAR DNA-binding protein 43	TARDBP;TDP43	26.743	3	0.00049272	4.13058	12.1536	12.4173	13.7487	17.9537	16.2343	16.5234
Q9BYG3;B4DSM4;C9J6C5	MKI67 FHA domain-interacting nucleolar phosphoprotein	NIFK	34.222	5	0.000112876	4.10931	12.1536	12.5153	12.4499	17.3909	16.0346	16.0213
J3QSV6;A0PJ61;Q32Q62;O76021;I3L3C4;A0PJ87	Ribosomal L1 domain-containing protein 1	RSL1D1	48.208	3	0.000872792	4.08643	12.1536	12.5153	14.3718	16.5445	16.762	17.9934
Q9BQG0;Q9BQG0-2;I3L1L3	Myb-binding protein 1A	MYBBP1A	148.85	10	0.00108797	4.08149	9.92113	12.5153	12.4923	15.8138	15.5597	15.7997
B4DQF6;B3KPB9;B0QY89;Q9Y262-2;Q9Y262;B0QY90;B3KNG0;Q8N7H0	Eukaryotic translation initiation factor 3 subunit L	EIF3L	62.691	9	0.00149596	4.04484	12.1536	12.0123	14.7757	16.6245	17.1833	17.2683
V9HWK0;O76094;Q86X80;A0PJJ5;Q0D2M6;Q71V07;O76094-2	Signal recognition particle subunit SRP72	HEL103;SRP72	74.605	11	0.000729124	4.03772	13.3155	12.5153	14.7725	18.374	17.1219	17.2204
Q59FA2;J3KTL2;Q07955-3;Q07955;Q07955-2;A8K1L8	Serine/arginine-rich splicing factor 1	SRSF1	25.624	6	0.00352855	4.03527	12.1536	14.8415	12.6097	17.7419	18.2097	15.7591
P62851	40S ribosomal protein S25	RPS25	13.742	3	0.000200066	4.03331	17.2466	15.7457	17.3953	21.0911	20.6598	20.7366
B3KTM6;A2RUM7;P46777;Q59GX9	60S ribosomal protein L5	RPL5	28.044	11	0.00158806	3.88558	16.2221	18.2488	18.7395	22.4105	21.5521	20.9044
Q9UHB9;B4DVI7;Q9UHB9-4;Q9UHB9-2;Q96K98;Q96K97;B3KMI9	Signal recognition particle subunit SRP68	SRP68	70.729	9	0.00044993	3.75579	12.1536	11.5001	12.3711	16.8538	15.1204	15.318
Q0QEW2;G3V203;H0YHA7;A0A024QZD1;J3QQ67;Q07020-2;Q07020;F8VYV2;B4DDY5;A0A075B7A0;F8VUA6	60S ribosomal protein L18	RPL18	18.732	6	0.00142702	3.70662	18.0038	19.9242	20.5562	23.6565	23.1682	22.7794
E9PJD9;Q9BQQ5;E9PLL6;Q6NZ52;P46776	60S ribosomal protein L27a	RPL27A;L27a	10.127	3	0.00238449	3.58706	17.2993	19.0779	19.4644	23.3222	21.8269	21.4537
O14929-2;O14929	Histone acetyltransferase type B catalytic subunit	HAT1	39.786	2	5.60903e-05	3.58172	12.1536	12.5153	12.6097	16.1734	16.006	15.8444
P46087-2;P46087;P46087-4;P46087-3	Probable 28S rRNA (cytosine(4447)-C(5))-methyltransferase	NOP2	88.972	6	0.000392572	3.50474	12.1536	12.5153	13.4802	15.97	16.8635	15.8298
C9JXB8;C9JNW5;V9HW01;P83731	60S ribosomal protein L24	RPL24;HEL-S-310	14.369	6	0.00109887	3.4502	17.4833	18.3565	19.2417	22.6183	21.7498	21.064
I3L3Q7;I3L3B0;A8K651;Q07021	Complement component 1 Q subcomponent-binding protein, mitochondrial	C1QBP	20.006	3	0.00479803	3.38649	12.1536	14.194	12.6097	16.8862	14.9034	17.3273
Q96HT3;O15160-2;O15160;E7EQB9;D6RDJ3;H0Y723;B4DEC2	DNA-directed RNA polymerases I and III subunit RPAC1	POLR1C	38.461	4	0.000825196	3.32164	13.9589	12.5153	12.6097	16.9132	16.4396	15.6961
P62269	40S ribosomal protein S18	RPS18	17.718	7	0.000815118	3.29555	18.4593	19.0546	19.7809	22.6401	21.5575	22.984
E4W6B6;B2R4D8;A0A024R1V4;K7ELC7;P61353;K7EQQ9	60S ribosomal protein L27	RPL27	14.257	3	0.000560777	3.22527	18.4961	19.0603	19.3732	22.8825	22.2685	21.4545
J3KMX5;P62277;E9PS50	40S ribosomal protein S13	RPS13	16.733	4	0.00197067	3.16795	15.7533	17.4665	17.7364	20.7879	19.7874	19.8849
B2R8R5;Q13263;Q13263-2;M0R0K9	Transcription intermediary factor 1-beta	TRIM28	88.559	5	0.000291687	3.16585	12.1536	12.5153	12.9975	16.192	15.6441	15.3279
Q05BS0;Q6P1R0;Q3B770;Q7Z5T5;Q24JU4;J9R021;Q14152-2;Q14152	Eukaryotic translation initiation factor 3 subunit A	EIF3A;eIF3a	74.666	11	0.00480041	3.16319	13.7103	13.8221	16.3623	17.675	18.1573	17.552
Q6NXR8;P61247;D6RAT0;H0Y9Y4;D6R9B6;D6RG13;A8K4W0;B7Z3M5;D6RB09;E9PFI5	40S ribosomal protein S3a	RPS3A	29.975	10	0.00226811	3.15337	17.672	16.5473	17.8529	21.6515	19.6542	20.2266
P18124;A0A024R814;A8MUD9;O95036	60S ribosomal protein L7	RPL7;WUGSC:H_RG054D04.1	29.225	11	0.00152079	3.00531	19.6424	19.2042	19.4988	23.2749	22.7482	21.3383
A0A0U1RRC2;A0A024R482;Q96IJ6;Q96IJ6-2;A0A087WUI8	Mannose-1-phosphate guanyltransferase alpha	GMPPA	11.781	2	0.00182881	2.98387	13.8494	12.5153	12.6097	16.3467	15.0872	16.4922
E7EX73;B4DSI9;E9PGM1;E7EUU4;B4DGF1;B2RU10;B2RU06;Q4LE58;Q04637-6;Q04637-7;Q04637-5;Q04637-4;Q04637-3;Q04637;Q04637-8;Q04637-9;C9J6B6;C9J2Z7;C9K073;C9JF13	Eukaryotic translation initiation factor 4 gamma 1	EIF4G1;EIF4G1 variant protein	158.64	5	0.00164927	2.96884	11.645	12.0824	13.3871	14.7763	15.5912	15.6535
Q9Y295	Developmentally-regulated GTP-binding protein 1	DRG1	40.542	7	0.00154803	2.93365	12.1536	12.8019	13.5705	15.5666	15.2167	16.5437
Q08211;B3KU66	ATP-dependent RNA helicase A	DHX9	140.96	15	0.00303656	2.91144	14.0291	15.2102	16.405	18.0271	18.3178	18.0338
O15371-2;O15371-3;O15371;B4E1K8	Eukaryotic translation initiation factor 3 subunit D	EIF3D	58.14	3	0.00443772	2.82326	11.8814	13.0063	13.991	15.1531	16.5684	15.627
E5RI99;A0A024R9D3;P62888	60S ribosomal protein L30	RPL30	12.656	5	0.00414013	2.7892	18.1509	18.9201	17.7502	21.5606	21.8001	19.828
Q5H909;A0A024R9Y7;Q9UNF1-2;Q9UNF1;B4DX55;B4DWM5;Q5H907	Melanoma-associated antigen D2	MAGED2	63.138	5	0.0021868	2.73462	12.1536	13.6731	13.9403	15.9002	15.923	16.1477
M0R210;P62249;A0A087WZ27;M0R3H0;M0QX76;M0R1M5	40S ribosomal protein S16	RPS16;ZNF90	14.419	6	0.000426036	2.73065	19.8749	19.2641	19.5867	22.6393	22.2279	22.0504
B4DH46;P61962;A0A087WWI6;P61962-2	DDB1- and CUL4-associated factor 7	DCAF7	19.155	2	0.000470505	2.72304	12.1536	12.5153	12.6097	14.9215	14.9234	15.6029
B3KQH1;A8K6V3;Q15393;B3KM77;Q15393-3	Splicing factor 3B subunit 3	SF3B3	99.921	5	0.00125059	2.66614	12.1536	12.5153	13.2395	15.5618	14.7232	15.6218
A0A024RCA7;P05387;H0YDD8	60S acidic ribosomal protein P2	RPLP2	11.665	4	0.00090545	2.60888	16.831	16.9069	17.1455	20.2349	19.2869	19.1882
Q99615;K7ESP1;Q59EH7;A8K4T2;K7EIH8;B7Z9W6;Q99615-2;K7EPP7;K7ELJ8;B4DKK3	DnaJ homolog subfamily C member 7	DNAJC7	56.44	8	0.00478177	2.56906	16.8861	14.9649	15.5388	18.0701	18.0292	18.9977
Q6IAX5;B2R806;P60228;B3KW56;E5RGA2;E5RHS5	Eukaryotic translation initiation factor 3 subunit E	EIF3E	52.205	11	0.00276316	2.53582	15.9897	16.2055	14.7354	17.9471	18.7034	17.8875
H7BY10;K7EJV9;K7ERT8;A8MUS3;P62750;K7EMA7	60S ribosomal protein L23a	RPL23A	17.692	3	0.00328033	2.51142	17.0121	17.2883	17.4219	20.583	18.7442	19.9294
Q9HAV0;A8K3F6;C9JD14	Guanine nucleotide-binding protein subunit beta-4	GNB4	37.567	2	0.000241559	-2.83118	15.2982	15.2797	14.8686	12.2935	12.4655	12.194
B3KTQ2;A0A024RC55;Q08431;A0A024RC59;F5GZN3;B4E396;Q08431-2;Q08431-3;X6R3G6;H0YKS8	Lactadherin;Lactadherin short form;Medin	MFGE8	42.459	14	0.0021213	-2.97525	23.6723	22.7109	22.0876	20.6519	19.0919	19.8013
O43854-2;O43854	EGF-like repeat and discoidin I-like domain-containing protein 3	EDIL3	52.747	7	0.00197446	-4.07933	19.2623	17.7602	17.4846	15.699	12.968	13.6022
P49792;D3DX73;B4DZH4;J3KNE0;Q7Z3J3;A6NKT7	E3 SUMO-protein ligase RanBP2;RanBP2-like and GRIP domain-containing protein 4;RanBP2-like and GRIP domain-containing protein 3	RANBP2;hCG_1994636;RGPD3;RGPD4	358.2	2	0.000384033	-4.12101	12.1536	12.5153	12.6097	9.63223	7.65571	7.62765
F8WBS5;F8WB72;C9K025;P18077	60S ribosomal protein L35a	RPL35A	6.4725	2	0.0208863	5.25286	12.1536	12.5153	19.1068	19.3938	19.8055	20.3349
P36578;Q59GY2;Q53G74;B4DMJ6;B4DFI6;H3BM89;B4DMJ2;H3BTP7	60S ribosomal protein L4	RPL4	47.697	19	0.00910921	5.1883	13.2522	17.7062	19.1366	22.885	21.6018	21.173
Q8TBK5;Q8N5Z7;B2R4K7;A0A024RBK3;Q9HBB3;Q02878;B4DRX3	60S ribosomal protein L6	RPL6	32.741	8	0.011663	4.95481	12.1536	15.6649	18.4462	19.7304	20.377	21.0217
F8W7C6;A0A087WV22;X5D7P1		RPL10	18.565	5	0.0106503	4.75938	12.1536	16.005	17.9571	20.8402	19.722	19.8316
A5D904;A0A024R4M0;P46781;B5MCT8;C9JM19;B7Z732	40S ribosomal protein S9	RPS9	13.161	5	0.0282367	4.72417	12.1536	17.6988	19.422	21.0151	20.928	21.5038
Q9Y5B9	FACT complex subunit SPT16	SUPT16H	119.91	15	0.00646802	4.39224	10.516	12.7823	15.2179	17.8175	17.4519	16.4234
C9J712;C9J0J7;C9JQ45;G5E9Q6;B4DNH1;D3DNI2;D3DNI3;P35080-2;P35080;C9J2N0	Profilin;Profilin-2	PFN2	9.7982	2	0.0297819	4.05816	12.1536	18.0183	12.6097	18.7395	17.9155	18.3012
A0A024R1N4;P12956;B1AHC9;B2RDN9;B4DE32;P12956-2;B4E356	X-ray repair cross-complementing protein 6	XRCC6	69.842	14	0.0298165	4.04994	12.1536	12.3945	17.7502	17.5397	17.7592	19.1492
P78527;P78527-2	DNA-dependent protein kinase catalytic subunit	PRKDC	469.08	60	0.00921415	4.04236	11.6734	12.8717	16.1805	17.7467	16.8815	18.2245
Q6ICQ4;A0A024R608;P05386;Q7Z612;Q6FG99	60S acidic ribosomal protein P1	RPLP1	11.5	2	0.01783	4.00501	12.1536	16.4697	17.4553	19.1885	19.2482	19.657
A0A024R4X0;P00387-2;P00387;P00387-3;B1AHF3;Q6ZVI6	NADH-cytochrome b5 reductase;NADH-cytochrome b5 reductase 3;NADH-cytochrome b5 reductase 3 membrane-bound form;NADH-cytochrome b5 reductase 3 soluble form	CYB5R3	33.238	3	0.0239288	3.92657	18.4932	15.643	12.6097	18.907	19.6724	19.9463
P13010;Q53T09	X-ray repair cross-complementing protein 5	XRCC5	82.704	15	0.0159614	3.72018	13.1495	12.5153	16.814	18.2516	16.7245	18.6633
A8K7N0;E7EPB3;A0PJ62;B7Z6S8;P50914;A8K3Q9	60S ribosomal protein L14	RPL14	23.646	6	0.0150542	3.68701	17.4198	20.513	21.6124	24.7074	23.5478	22.351
A0A0S2Z4G7;A0A0S2Z491;P06748-2;P06748;A0A140VJQ2;A4ZU86;P06748-3	Nucleophosmin	NPM1	29.464	6	0.0578296	3.66315	12.1536	16.0987	18.9794	18.2414	19.7121	20.2677
Q53HJ4;B2R7C5;A0A0S2Z4T1;P25205;Q8NHX6;A0A0S2Z492;P25205-2;B4DS46;B4DUQ9;J3KQ69	DNA helicase;DNA replication licensing factor MCM3	MCM3;HCC5	90.98	8	0.00647993	3.48981	10.5649	12.4503	14.0019	15.1331	16.6236	15.7298
Q92522	Histone H1x	H1FX	22.487	2	0.0497743	3.42006	12.1536	12.5153	17.416	18.381	16.092	17.872
M0QZN2;M0R0F0;Q53G25;A0A024R4Q8;M0R0R2;P46782	40S ribosomal protein S5;40S ribosomal protein S5, N-terminally processed	RPS5	14.763	2	0.0691119	3.41068	12.1536	15.4694	17.2571	16.8225	17.1727	21.117
A0PJ92;A8K9K6;O00567;H0Y653;H0YDU4	Nucleolar protein 56	NOP56	49.756	6	0.00599447	3.38534	12.1536	12.5153	15.2013	17.3115	16.0961	16.6185
Q6P2Q9;B4DK16	Pre-mRNA-processing-splicing factor 8	PRPF8	273.6	16	0.00691933	3.36525	10.597	12.5153	14.0594	15.6176	16.3786	15.2712
A8K525;A0A0S2Z4Z9;Q15233-2;Q15233;H7C367;C9JYS8	Non-POU domain-containing octamer-binding protein	NONO	54.287	4	0.0130027	3.32582	12.1536	12.5153	15.8995	16.6024	17.363	16.5805
B2R4R0;P62805;Q0VAS5	Histone H4	HIST1H4H;HIST1H4A	11.367	12	0.0752058	3.2782	21.5774	25.7174	28.269	29.3462	27.743	28.3094
Q59GY3;V9HVZ0;A8K588;Q13247-3;Q13247;B4DEM8;A0A0D9SEM4;Q53F45;Q59EF5;A8K644;Q08170	Serine/arginine-rich splicing factor 6;Serine/arginine-rich splicing factor 4	HEL-S-91;SRSF6;SRSF4;SFRS4	31.865	2	0.0227339	3.2382	15.1692	12.5153	16.2192	18.6826	18.7033	16.2322
A0A024RCN6;P26640;A0A140T936;A0A140T954;A2ABF4;A0A0G2JJT9	Valine--tRNA ligase	VARS	140.47	6	0.00839923	3.23674	10.6496	10.5441	13.4784	15.0294	13.952	15.4009
A4FU77;O75643	U5 small nuclear ribonucleoprotein 200 kDa helicase	SNRNP200	216.18	19	0.00761151	3.10645	12.1536	12.3217	14.992	16.1618	16.8727	15.7522
A0A024R4Z6;Q08945	FACT complex subunit SSRP1	SSRP1	81.074	10	0.0126674	3.08114	13.1457	14.2165	16.769	18.289	17.6747	17.4109
Q71UI9;P0C0S5;C9J0D1;Q71UI9-3;Q71UI9-4;Q71UI9-2;C9J386	Histone H2A.V;Histone H2A.Z;Histone H2A	H2AFV;H2AFZ	13.509	2	0.0781454	3.07743	15.1794	17.8899	21.4995	21.8516	20.257	21.6925
H0Y449;P67809;Q6PKI6;Q05D43;Q7KZ24;A0JLU4;Q2VIK8	Nuclease-sensitive element-binding protein 1	YBX1	41.905	4	0.0307099	3.00672	12.1536	15.7048	16.4325	17.8024	18.409	17.0997
Q9NR30-2;Q9NR30	Nucleolar RNA helicase 2	DDX21	79.656	13	0.039868	2.99742	12.3686	13.8612	17.1455	17.6249	18.1386	16.6041
Q9Y2X3;B3KN82	Nucleolar protein 58	NOP58	59.578	6	0.00706175	2.97781	12.1536	12.5153	11.6358	16.7983	14.0031	14.4368
O43143;B4E0S6	Pre-mRNA-splicing factor ATP-dependent RNA helicase DHX15	DHX15	90.932	7	0.011221	2.95227	12.1536	12.5153	15.2978	16.3825	15.872	16.5689
Q6IAJ3;A0A024R967;Q6FIF9;B1ALM5;B4E1H4;Q9P0T7;B1ALM7;B1ALM8;B1ALM4	Transmembrane protein 9	TMEM9	20.502	2	0.054021	2.9375	17.4184	16.6618	12.6097	19.612	18.0291	17.8613
P51571;A6NLM8	Translocon-associated protein subunit delta	SSR4	18.998	2	0.102173	2.93371	18.2635	12.5153	12.6097	16.6329	16.9797	18.5769
E9PGT6;B2R8N1;A0A024R4D1;Q99627-2;Q99627;H7C3S9	COP9 signalosome complex subunit 8	COPS8	19.344	2	0.0356945	2.9171	12.1536	12.5153	16.4593	16.3153	16.6766	16.8876
A0A024R3T8;P09874;B2R5W3;B4E0E1	Poly [ADP-ribose] polymerase 1	PARP1	113.08	44	0.0211265	2.91423	17.9216	18.4523	21.1523	23.2951	21.8861	21.0876
A0A0R4J2E8;A8MXP9;P43243;Q68D11;Q5CZA7;B3KM87;B4DRS1;D6REM6;P43243-2;Q9H4N1;D6R991;B4DF66	Matrin-3	MATR3;DKFZp686K23100;DKFZp686K0542	94.622	6	0.0117808	2.90009	11.3994	12.5153	14.7637	16.0492	15.8834	15.4461
A0A0U1RQH7;B7Z4L7;Q6N037;E1P5S2;G3XAC6;B4DRA0;B4DLM0;B3KWX7;Q68DD9;B4E1M7;Q14498-3;Q14498-2;Q14498;H0Y4X3;Q7Z3L0;Q6MZY7;A0A0U1RQW2;Q5QP23	RNA-binding protein 39	DKFZp686A11192;RNPC2;RBM39;DKFZp781C0423;DKFZp781I1140;DKFZp686C17209	26.698	4	0.0120186	2.80794	12.1536	12.9507	14.794	15.9776	17.1612	15.1835
B3KSL5;Q9Y383;B3KRR1;Q96HJ9-2;A0A0A6YYJ8;Q9Y383-3;Q9Y383-2	Putative RNA-binding protein Luc7-like 2	LUC7L2	46.483	3	0.00919624	2.79126	12.1536	12.5153	14.6903	16.1558	16.4707	15.1065
B4DP61;E7EQZ4;Q16637-4;Q16637-2;Q16637-3;Q16637;H0YBZ9;I2E4S9;I2E4T2;I3QJX8;I2E4T3;I6T6Y4;A0A0G2JRX5;I2E4S7;I2E4T1;I3QJX9;A0A0G2JRY6;A0A076L8Z0	Survival motor neuron protein	SMN2;SMN1	24.38	2	0.0107843	2.76314	12.1536	12.5153	14.9757	16.075	16.3576	15.5013
P11387;B9EG90	DNA topoisomerase 1	TOP1	90.725	13	0.024869	2.73809	15.299	14.5948	18.0823	19.6373	18.3573	18.1957
Q9BT67	NEDD4 family-interacting protein 1	NDFIP1	24.899	2	0.022676	2.73715	12.1536	14.2765	12.6097	14.0252	16.0406	17.1855
B3KSG9;A0A024QYR8;Q99805	Transmembrane 9 superfamily member 2	TM9SF2	65.43	6	0.00807658	2.73418	15.2706	16.6619	13.9429	17.7781	17.6952	18.6046
B2R4S9;A8K9J7;A0A024RCJ9;A0A024QZZ7;I6L9F7;U3KQK0;Q99880;Q99879;Q99877;Q93079;Q5QNW6;P62807;P58876;Q5QNW6-2;Q0D2M2;B4DR52	Histone H2B;Histone H2B type 1-L;Histone H2B type 1-M;Histone H2B type 1-N;Histone H2B type 1-H;Histone H2B type 2-F;Histone H2B type 1-C/E/F/G/I;Histone H2B type 1-D	HIST1H2BI;HIST1H2BN;HIST1H2BD;HIST1H2BM;HIST1H2BL;HIST1H2BH;HIST2H2BF;HIST1H2BC	13.906	7	0.0963105	2.73142	21.2136	24.7037	27.2086	27.9672	26.3041	27.0488
O75607	Nucleoplasmin-3	NPM3	19.343	2	0.0303449	2.71048	12.1536	15.1699	15.6787	17.2136	17.8391	16.081
Q2NLD4;Q2NLC9;Q5U0P9;Q56A79;Q00577	Transcriptional activator protein Pur-alpha	PURA	32.015	2	0.0137194	2.70881	12.1536	12.5153	14.9673	15.4123	16.663	15.6873
G3V4I1;G3V5F3;J3KNG4;Q53GW1;Q8WVM8;G3V3K9;G3V363;H0YJS6;G3V2M8	Sec1 family domain-containing protein 1	SCFD1	8.2396	2	0.0089145	2.65804	12.1536	14.6239	12.6097	15.8997	16.2961	15.1656
A0A0B4J1Z1;B4DEK2;C9JAB2;Q16629-3;Q16629-2;Q16629-4;Q16629;Q8NB80	Serine/arginine-rich splicing factor 7	SRSF7	15.763	3	0.00525267	2.64688	15.0809	15.8299	17.1227	18.9357	19.1184	17.92
E1NZA1;A0A024RBS1;Q92616	Translational activator GCN1	PRIC295;GCN1L1	292.74	8	0.00703335	2.62854	11.4526	9.19748	11.4819	13.3172	13.2295	13.4708
B3KM80;Q6ZS99;B3KTP9;A0A024R4A0;P19338;H7BY16;Q9BQ02	Nucleolin	NCL	58.554	12	0.0234062	2.60441	16.2439	15.7154	18.4278	19.3668	20.5864	18.2472
Q8TEX9;Q8TEX9-2;H0YN14;B3KQ33;Q59FI4;D3DS63;B3KTB3;B3KT38;B3KPS9	Importin-4	IPO4	118.71	9	0.0107374	2.59991	14.3582	11.5652	13.3406	15.6565	16.1024	15.3048
E9PD53;B3KXX5;Q9NTJ3;Q9NTJ3-2;B3KVJ5;Q6NSG3;Q58F29	Structural maintenance of chromosomes protein;Structural maintenance of chromosomes protein 4	SMC4	144.45	6	0.00554878	2.59979	11.4076	12.5153	13.5584	14.8602	15.7138	14.7067
Q4VB24;B2R984;A3R0T8;A3R0T7;P10412;P16403;P16402	Histone H1.4;Histone H1.2;Histone H1.3	HIST1H1E;HIST1H1C;HIST1H1D	21.893	11	0.0939806	2.59109	18.4371	20.2573	23.5571	24.7809	22.1229	23.121
O75533;Q7Z497	Splicing factor 3B subunit 1	SF3B1	145.83	4	0.0144546	2.58231	12.1536	10.765	12.7566	14.4496	13.2691	15.7034
A5PLK7;A0A024RAC5;Q9P258	Protein RCC2	RCC2	49.678	3	0.00529991	2.56103	12.1536	12.5153	12.8653	15.874	15.5297	13.8135
A0A024QZ44;A0A024QZ15;Q96NT5-2;Q96NT5;J3QRF7;B4DJ17	Proton-coupled folate transporter	HCP1;SLC46A1	46.643	2	0.0115592	2.54669	12.1536	12.5153	14.2119	15.5202	14.5402	16.4604
Q96BA7;B3KX72;B4DLR3;Q00839-2;Q00839;Q7Z4Q5	Heterogeneous nuclear ribonucleoprotein U	HNRNPU;HNRPU	79.715	11	0.0194134	2.53474	15.147	16.5227	18.0681	19.3103	19.8549	18.1768
Q5JPU2;Q5JPU0;Q5JPT9;Q5JPU1;Q53GE3;A0A024RBX9;P08559-3;P08559;P08559-2;P08559-4	Pyruvate dehydrogenase E1 component subunit alpha;Pyruvate dehydrogenase E1 component subunit alpha, somatic form, mitochondrial	PDHA1	13.814	2	0.215227	2.5338	19.9311	12.5153	19.2459	20.0299	20.2746	18.9891
A0A024R7F1;K7ELL7;B4DJQ5;P14314-2;P14314;A0A0S2Z4D8;A0A0S2Z4W7;A2VCQ4	Glucosidase 2 subunit beta	PRKCSH	59.296	7	0.122036	2.52729	18.7285	14.3952	12.6097	17.8993	17.9635	17.4526
A8K1U0;A0A024R1V3;Q14596-2;Q14596;A0A024R1Y3;Q3LRK1;Q3LRI0;Q3LRI6;B7Z5R6	Next to BRCA1 gene 1 protein	NBR1	107.43	5	0.0155657	2.51906	12.1536	12.5153	10.6191	15.6674	13.7217	13.456
P23396;Q53G83;P23396-2;E9PPU1;H0YEU2;E9PL09;F2Z2S8;H0YF32;H0YCJ7;Q9NQS8	40S ribosomal protein S3	RPS3	26.688	8	0.00603231	2.51631	16.9779	18.8029	18.8855	20.2015	20.9743	21.0394
A0A090N8Y2;P13667	Protein disulfide-isomerase A4	ERP70;PDIA4	72.932	9	0.0947328	2.49017	17.8967	13.6267	12.6097	17.2474	17.2214	17.1349
B4DVK5;B4DQ39;B3KVF0;B1AHB1;Q53FG5;B1AHB0;A8K521;P33992;Q59F49	DNA helicase;DNA replication licensing factor MCM5	MCM5	44.981	4	0.0154644	2.48328	12.9621	12.5153	15.2035	15.4959	16.0541	16.5806
I1VZV6;D1MGQ2;P69905;U6A216;E9M4D4;G3V1N2;A0A0K2BMD8;Q96T46;E1B2D1;Q9BX83;Q4ZGM8	Hemoglobin subunit alpha	HBA1;HBA2	15.279	2	0.0652206	2.46735	25.5219	21.6547	21.1058	25.1177	25.5091	25.0577
D6RAA6;A6QKW0;A0A024R9W7;P57088	Transmembrane protein 33	TMEM33;SHINC3	25.223	3	0.0192678	2.4659	18.0204	17.6167	15.2918	18.674	19.6081	20.0445
E9PKZ0;P62917;G3V1A1;B4DVG7	60S ribosomal protein L8	RPL8	22.389	3	0.105915	2.45346	17.0077	18.3212	20.0828	22.8731	21.7084	18.1906
Q53F48;A0A024QZK8;P31942-3;P31942-2;P31942;A0A024QZP1;B4DHY1;P31942-6;P31942-5;P31942-4	Heterogeneous nuclear ribonucleoprotein H3	HNRPH3;HNRNPH3	36.925	2	0.00507955	2.4497	12.1536	12.5153	14.1416	15.3082	15.3698	15.4815
H0YKB3;V9HW89;Q00796-2;Q00796	Sorbitol dehydrogenase	SORD;HEL-S-95n	12.71	2	0.0484671	2.44795	12.1536	16.0578	12.6097	16.4646	15.9176	15.7828
P11388;P11388-2;P11388-3;P11388-4	DNA topoisomerase 2-alpha	TOP2A	174.38	11	0.0638784	2.43721	12.1536	11.5805	15.8819	16.0445	15.2628	15.6203
B4DFG0;P35659-2;P35659;H0Y993;B4DNW3	Protein DEK	DEK	39.5	3	0.0375091	2.4213	12.1299	13.4093	15.3854	16.4878	16.8661	14.8345
Q96DV6;A2A3R6;P62753;A2A3R5	40S ribosomal protein S6	RPS6	28.708	10	0.0644975	2.41409	20.9011	21.8035	20.3987	25.9511	22.7638	21.6307
C6EMX8;B2RBA6;A0A0S2Z4A5;P33993;B3KUD7;B4DDF5;P33993-3;Q9H4N9	DNA helicase;DNA replication licensing factor MCM7	MCM7	81.279	4	0.0281277	2.40817	14.0582	10.7273	13.207	15.3098	15.3128	14.5945
B2RD27;P51665;B4DXI8	26S proteasome non-ATPase regulatory subunit 7	PSMD7	37.011	3	0.0160062	2.39861	13.4448	12.5153	12.6097	16.8046	14.1054	14.8557
Q8IXJ3;B4DZB1;B3KX19;Q6IBM8;A8KAP3;Q15029-2;Q15029;Q15029-3;B3KWY2	116 kDa U5 small nuclear ribonucleoprotein component	SNRP116;U5-116KD;EFTUD2	95.371	10	0.00652031	2.39323	13.2692	13.7401	14.9843	16.0599	17.1619	15.9514
C9JJT5;C9JU26;G3V325;B4DJ38;P56134-4;P56134-3;P56134-2;P56134;Q53FE1	ATP synthase subunit f, mitochondrial	ATP5J2-PTCD1;ATP5J2	5.9149	2	0.0149136	2.36209	15.4132	14.3178	12.6097	16.4191	16.3579	16.6501
A0A024R169;Q9NXF1-2;Q9NXF1;B7Z9D5;B4DQR0	Testis-expressed sequence 10 protein	TEX10	105.67	5	0.00178761	2.35478	12.1536	12.5153	12.6097	14.3788	15.4535	14.5108
G3V576;G3V4W0;B4DY08;B2R5W2;G3V4C1;B2R603;G3V2Q1;A8K9A4;P07910-2;P07910;B3KX96;P07910-4;G3V555;G3V575;G3V5X6;G3V3K6;G3V251;B4DMJ1;B4DSU6;D3DPI2;G3V4M8;A0A0G2JNQ3;P07910-3;B2RXH8	Heterogeneous nuclear ribonucleoproteins C1/C2;Heterogeneous nuclear ribonucleoprotein C-like 2	HNRNPC;hCG_1641229;HNRNPCL2	25.256	8	0.016254	2.33948	18.1487	19.7935	19.1867	21.0516	22.6891	20.4066
Q96IR1;Q53HV1;B2R491;P62701	40S ribosomal protein S4;40S ribosomal protein S4, X isoform	RPS4X	27.259	10	0.0111494	2.33774	17.2823	17.3293	18.9982	20.943	19.3225	20.3575
Q53ER0;A8K6K7;P13807-2;P13807;B7Z806;B7Z6I6	Glycogen [starch] synthase, muscle	GYS1	83.857	5	0.258779	2.32268	12.1536	13.677	18.8661	18.7589	14.5295	18.3764
B4DRU0;B4DVU3;B4DDN4;B4DVQ5;A1KYQ7;A0A024QYU9;Q99613-2;Q99613;B5ME19;A0A024QYX7;B3KNZ4;B4E2Z6	Eukaryotic translation initiation factor 3 subunit C;Eukaryotic translation initiation factor 3 subunit C-like protein	EIF3C;EIF3CL	84.966	9	0.00439852	2.32053	15.0941	15.3419	15.8125	17.8129	18.5337	16.8634
Q6LES9;A8K3S0;Q59GW7;P40937-2;P40937;F5H5S0;C9JH72;A8K4Z2	Replication factor C subunit 5	RFC5	38.397	3	0.00278926	2.3101	12.1536	12.5028	12.6097	14.9581	15.3022	13.9362
A0A0S2Z5K3;Q3LIB4;A0A0S2Z5R3;Q9NPI6-2;Q9NPI6	mRNA-decapping enzyme 1A	Nbla00360;DCP1A	59.488	3	0.0182585	2.29091	12.1536	12.5153	12.6097	13.7708	16.3652	14.0154
A3KPC7;A0A024RAS2;B2R5B3;A4FTV9;A0A0U1RR32;A0A0U1RRH7;Q99878;Q96KK5;Q9BTM1;Q16777;Q6FI13;P20671;P0C0S8;H0YFX9;B4E0B3;B2R5B6;Q9BTM1-2;Q96QV6;P16104	Histone H2A;Histone H2A type 1-J;Histone H2A type 1-H;Histone H2A.J;Histone H2A type 2-C;Histone H2A type 2-A;Histone H2A type 1-D;Histone H2A type 1;Histone H2A type 1-A;Histone H2AX	HIST1H2AH;H2AFJ;HIST1H2AK;HIST1H2AJ;HIST2H2AC;HIST2H2AA3;HIST1H2AD;HIST1H2AG;HIST1H2AA;H2AFX	13.906	6	0.105189	2.287	22.4158	24.2981	27.2463	27.9964	25.8451	26.9796
B2R659;A0A0S2Z4J1;P51659;B4DDM5;E7ER27;E7EWE5;B4DSD0;P51659-3;P51659-2	Peroxisomal multifunctional enzyme type 2;(3R)-hydroxyacyl-CoA dehydrogenase;Enoyl-CoA hydratase 2	HSD17B4	79.611	9	0.148248	2.28643	18.0163	13.1977	12.6097	17.4352	17.344	15.9039
O75367-2;O75367-3;O75367;D6RCF2	Core histone macro-H2A.1;Histone H2A	H2AFY	39.183	6	0.314144	2.27661	12.1536	20.7496	19.6683	20.2571	19.9612	19.183
H7C0R3;Q9H3A5;Q9BUZ3;B4DDN1;Q96AW5;B4DNN3;A0A1B0GVU9;Q53HS0;A8K3A8;P47897-2;P47897;A0A0U1RRC8;A0A0U1RQX5;A0A1B0GTT3;A0A0U1RQQ5	Glutamine--tRNA ligase	QARS	28.565	2	0.00215962	2.25879	12.1536	12.5489	12.6097	14.0556	14.8963	15.1368
Q9Y3B4	Splicing factor 3B subunit 6	SF3B6	14.585	2	0.0194772	2.25863	12.1536	13.6017	14.239	14.6341	15.5315	16.6046
Q53HT6;Q53G72;P51572;P51572-2;C9JMD7;C9JSP1;C9JQ75;C9J0M4	B-cell receptor-associated protein 31	BCAP31	27.961	4	0.115364	2.25611	17.19	12.5153	12.6097	16.938	15.8902	16.2552
B4DMT5;B3KSH1;O00303;B4DEW9	Eukaryotic translation initiation factor 3 subunit F	EIF3F	33.24	5	0.0155812	2.24599	14.5418	15.7053	16.9247	17.5627	18.679	17.668
P25398	40S ribosomal protein S12	RPS12	14.515	3	0.101196	2.2393	16.9158	15.8462	12.6097	18.7849	16.7388	16.5659
A0A090N7X1;A0A090N7Y2;Q9UG63;Q9UG63-2	ATP-binding cassette sub-family F member 2	ABCF2	71.289	2	0.000965334	2.23092	12.1536	12.5361	12.6097	14.5793	14.7	14.7129
Q6IBU0;A0A024R6Q1;P55010	Eukaryotic translation initiation factor 5	EIF5	49.151	3	0.0323803	2.2247	14.2728	13.5518	16.3937	16.6261	17.887	16.3794
P62906;A0A024RCW3;Q1JQ76	60S ribosomal protein L10a;Ribosomal protein	RPL10A	24.831	3	0.0138086	2.21883	15.5337	16.8802	17.5655	18.6163	18.3152	19.7044
Q86T03;Q86T03-2	Type 1 phosphatidylinositol 4,5-bisphosphate 4-phosphatase	TMEM55B	29.469	3	0.0291095	2.20819	14.0452	15.6756	12.6097	16.0853	16.8797	15.9901
Q2KQ72;Q05BV1;B7ZLZ7;B3KMB1;A8K984;A0A024R158;O95347-2;O95347;Q7Z2X1;Q6IPS5	Structural maintenance of chromosomes protein;Structural maintenance of chromosomes protein 2	SMC2;SMC2L1	85.978	3	0.00488051	2.18328	12.2746	12.5153	12.6097	15.1067	15.1423	13.7004
B4DNG2;B4DN41;J3KTA4;B5BUE6;P17844-2;P17844;Q7Z2V5;Q59E92;J3KRZ1	Probable ATP-dependent RNA helicase DDX5	DDX5;DKFZp686J01190	61.516	2	0.00825457	2.18188	12.1536	12.5153	13.9613	14.6261	15.1995	15.3502
B2R6D0;A0A087WW66;Q99460-2;Q99460;Q05BX4;Q05CW6	26S proteasome non-ATPase regulatory subunit 1	PSMD1	105.84	6	0.0113816	2.17896	13.7161	11.723	13.4258	14.6902	15.2126	15.499
A0A024R7T3;P52597;B4DKS8	Heterogeneous nuclear ribonucleoprotein F;Heterogeneous nuclear ribonucleoprotein F, N-terminally processed	HNRPF;HNRNPF	45.671	2	0.0387951	2.15926	12.1536	12.7043	14.8443	14.2922	15.7443	16.1436
A0A0S2Z4Y4;A0A0S2Z5H3;Q14677;Q14677-3;Q14677-2	Clathrin interactor 1	CLINT1	68.259	2	0.00312284	2.14081	12.1536	12.1475	12.3905	14.0253	15.1009	13.9878
A0A0S2Z489;O00232-2;O00232;A0A0S2Z476	26S proteasome non-ATPase regulatory subunit 12	PSMD12	52.904	3	0.00263601	2.13916	12.1536	12.5153	12.6097	15.1253	14.5061	14.0647
Q75MT5;B5BUD2;P35250-2;P35250;H7C5S7;H7C5P1;H7C5Q7;F8WC37;H7C5A0;H7C5G4	Replication factor C subunit 2	RFC2	35.243	2	0.00549449	2.12893	12.1536	12.5153	12.6097	15.4807	14.0982	14.0865
H3BS72;Q9P035;H3BPZ1;Q9P035-2;H3BRL8	Very-long-chain (3R)-3-hydroxyacyl-CoA dehydratase 3	HACD3	47.118	4	0.0906447	2.12503	17.1807	14.9907	12.6097	16.7249	17.3382	17.0932
Q96GA3;B4DTT8	Protein LTV1 homolog	LTV1	54.854	3	0.0239912	2.12474	12.1536	12.5153	12.6097	16.0931	14.2368	13.3229
O60832-2;O60832;C9IYT0;U5UA77;U5U7S7;H7C0M1	H/ACA ribonucleoprotein complex subunit 4	DKC1	47.602	4	0.0271801	2.10914	12.1536	12.5153	12.6097	15.6062	15.1268	12.873
P53621;P53621-2	Coatomer subunit alpha;Xenin;Proxenin	COPA	138.34	16	0.0173622	2.10801	14.2591	15.0586	16.5265	17.2746	16.9243	17.9693
Q9NZI8;D3DTW3;Q9NZI8-2	Insulin-like growth factor 2 mRNA-binding protein 1	IGF2BP1	63.48	5	0.00298299	2.08904	14.5589	13.8364	14.3528	16.3294	16.7918	15.894
Q15397;B2RDG4	Pumilio domain-containing protein KIAA0020	KIAA0020	73.584	6	0.0637325	2.07692	12.1536	12.5153	12.6097	16.7054	13.7877	13.0163
Q59GE4;P46783;F6U211;S4R435;Q9NQ39	40S ribosomal protein S10;Putative 40S ribosomal protein S10-like	RPS10;RPS10-NUDT3;RPS10P5	19.86	2	0.0125424	2.07646	14.614	15.8766	16.3367	16.9868	17.8043	18.2657
B3KNN7;B4DEB0;B4DPM7;Q96N86;B4DV84;Q8N9M2;Q6IBN0;O43242;O43242-2	26S proteasome non-ATPase regulatory subunit 3	PSMD3	57.232	7	0.017284	2.06741	14.8901	13.8812	16.2566	16.9531	16.8634	17.4135
B4E1L0;A0A024R5Q7;P30520	Adenylosuccinate synthetase isozyme 2	ADSS	47.938	2	0.00729596	2.06381	13.0878	14.277	12.6097	15.5785	15.1642	15.4234
B4E318;B4DUS0;Q9P287-4;Q9P287-3;Q9P287;Q9P287-2	BRCA2 and CDKN1A-interacting protein	BCCIP	29.797	2	0.0140989	2.05915	12.1536	12.5153	13.8055	14.1693	15.6286	14.854
Q9BR63;A8K666;Q9NSD9;B7ZB32;Q9NSD9-2	Phenylalanine--tRNA ligase beta subunit	FARSB	65.7	4	0.00898823	2.05292	12.1536	12.4204	13.6023	14.1866	14.853	15.2955
B4E380;K7EK07;B2R4P9;Q71DI3;P84243;P68431;K7EMV3;B4DEB1;B2R6Y1;K7ES00;Q16695;A8K4Y7;Q6NXT2	Histone H3;Histone H3.2;Histone H3.3;Histone H3.1;Histone H3.1t;Histone H3.3C	H3F3B;H3F3A;HIST2H3A;HIST1H3A;HIST3H3;H3F3C	12.918	5	0.0882387	2.04721	21.9957	23.2453	25.4326	27.0421	24.4378	25.3354
A0A024R8W0;P38919;I3L3H2	Eukaryotic initiation factor 4A-III;Eukaryotic initiation factor 4A-III, N-terminally processed	DDX48;EIF4A3	46.871	2	0.0195177	2.04548	13.1048	12.5153	12.6097	15.3921	15.5908	13.3833
H3BLZ8;Q59F66;Q92841-1;Q92841-3;Q92841-2;Q92841;B4DZQ7	Probable ATP-dependent RNA helicase DDX17	DDX17	80.439	7	0.0159192	2.03041	14.4737	15.2494	16.6504	17.1147	17.8229	17.5271
C9JD32;B9ZVP7;J3KT29;Q9BTQ7;A0A024R1Q8;P62829	60S ribosomal protein L23	RPL23	9.6694	2	0.00314831	2.027	17.2416	18.0766	17.6897	19.3147	19.9925	19.7816
B7ZAX9;B4DZC0;O60264	SWI/SNF-related matrix-associated actin-dependent regulator of chromatin subfamily A member 5	SMARCA5	116.77	6	0.0292729	2.00966	12.9403	12.5153	15.0493	15.9807	15.3691	15.1842
R4GMU7;A0A024RD36;Q6DKI1;B3KMP5;A8K5J5;B7Z4G0;Q6DKI1-2	60S ribosomal protein L7-like 1	RPL7L1	22.746	2	0.0269779	1.99544	12.1536	12.5153	12.6097	14.4861	13.0469	15.7319
C9JB42;C9JDR7;C9JDX6;F8WCZ4;C9J2P2;B4DNF1;E9PH18;B4DMJ9;C9J2C4;A7UJ17;B4DVN1;A0A0J9YX62;O75190-2;O75190-3;O75190;C9JN01;B4DNN5;Q8WWF6	DnaJ homolog subfamily B member 6;DnaJ homolog subfamily B member 3	DNAJB6;DNAJB3	7.8818	2	0.250677	1.992	18.174	19.093	12.6097	18.9678	18.5651	18.3197
Q4ZG57;Q14566	DNA replication licensing factor MCM6	MCM6	88.945	6	0.0253221	1.97658	13.829	12.5153	14.9293	15.4579	15.4102	16.3352
P61221;D6R9I9	ATP-binding cassette sub-family E member 1	ABCE1	67.314	3	0.0202955	1.96941	12.1536	12.6391	13.5045	14.1785	14.1434	15.8836
B4DYN3;B3KPP7;A8K140;A0A024R438;Q7Z3C6-2;Q7Z3C6	Autophagy-related protein 9A	ATG9A	87.282	5	0.0312496	1.96817	12.1536	14.8788	12.9118	15.3675	15.331	15.1503
B4DJV2;A0A024RB75;O75390;F8VTT8;F8W4S1;A0A0C4DGI3;B3KTN4;F8W642;F8VZK9;F8VX07;F8VRP1;F8VX68;F8VWQ5;F8VPF9;F8VPA1;F8W1S4;H0YH82;B7Z1E1	Citrate synthase;Citrate synthase, mitochondrial	CS	50.431	4	0.188374	1.95183	16.7627	14.4706	12.6097	15.8994	14.9241	18.875
B4E266;B4DER1;B2RCM2;Q9P2J5;Q9P2J5-2;Q9H8E3;Q9P2J5-3;Q9HAM7	Leucine--tRNA ligase, cytoplasmic	LARS	129.19	10	0.0505993	1.94963	14.7506	12.5633	15.4019	15.7864	15.732	17.0464
O75396	Vesicle-trafficking protein SEC22b	SEC22B	24.593	5	0.163061	1.93674	17.771	15.8244	12.6097	17.7382	17.7258	16.5514
A8K492;P56192;B4DF61;B4E0E9;P56192-2	Methionine--tRNA ligase, cytoplasmic	MARS	101.14	6	0.083487	1.93311	14.1778	11.8648	15.7194	15.7096	15.4702	16.3815
D6RAN4;Q53Z07;P32969;B4E1M5;E7ESE0;B4DLV8;H0Y9V9;H0Y9R4;Q2NKY6	60S ribosomal protein L9	RPL9	20.775	4	0.0145702	1.9321	15.6292	16.6438	17.6788	18.4495	18.6382	18.6603
Q969E2-2;Q969E2;K7EJJ4;C9JWM2;Q969E2-3	Secretory carrier-associated membrane protein 4	SCAMP4	22.047	2	0.204943	1.9281	17.6295	12.5153	17.4628	18.624	16.9595	17.8083
Q86WV2;H3BN72;H3BNV9;P13073;H3BNI5;H3BPG0	Cytochrome c oxidase subunit 4 isoform 1, mitochondrial	COX4I1	9.2906	2	0.256079	1.91909	19.4653	16.1916	12.6097	18.1502	17.8916	17.9821
Q4G0J3;Q4G0J3-3;D6RFF0;H0YA82	La-related protein 7	LARP7	66.898	4	0.0464512	1.91794	12.1536	12.5153	12.6097	15.6842	14.713	12.6353
A0A024QZV0;Q86UY0;Q6EHZ3;Q658S9;Q8NBS9-2;Q8NBS9	Thioredoxin domain-containing protein 5	hCG_1811539;TXNDC5;STRF8;DKFZp666I134	36.177	5	0.182683	1.91351	16.7381	15.4787	11.4065	16.7225	16.663	15.9783
O15173;O15173-2	Membrane-associated progesterone receptor component 2	PGRMC2	23.818	3	0.165324	1.90032	16.9029	17.0332	12.6097	16.4418	17.9883	17.8167
Q05D78;F8W7U8;A0A024R395;P49959-2;P49959;P49959-3;Q9BS79;F5GXT0	Double-strand break repair protein MRE11A	MRE11A	59.724	3	0.0157468	1.88197	12.1536	12.5153	12.6097	13.1726	14.7992	14.9528
D3DN77;A0A024R3Z6;Q53FN7;Q7L1Q6-2;Q7L1Q6;Q7L1Q6-4;Q7L1Q6-3;B3KU41;C9JFN4;C9IZ80	Basic leucine zipper and W2 domain-containing protein 1	hCG_2022736;BZW1	30.768	2	0.0936884	1.86781	15.3402	16.2828	12.6097	16.0189	17.2753	16.5421
B4DXN6;B4DV79;A4D210;A0A024R821;P55884;P55884-2;Q96G38	Eukaryotic translation initiation factor 3 subunit B	EIF3B;EIF3S9	77.225	7	0.0263763	1.84926	13.6882	14.7113	15.9083	16.1178	17.063	16.6747
A0A1B0GV93;B4DWS6;B3KQJ0;D3DR22;Q53GQ0;E9PI21	Very-long-chain 3-oxoacyl-CoA reductase	HSD17B12	30.361	3	0.0599908	1.8476	14.26	15.3176	12.6097	14.8305	16.3932	16.5064
N0E466;N0E4C7;Q5SRQ3;Q5SRQ6;N0E472;A0A0G2JM12;P67870;N0E650;N0E638;N0E6J1;B4DUJ4;N0E644;A0A0G2JM58	Casein kinase II subunit beta	CSNK2B;CSNK2B-LY6G5B-1181;CSNK2B-LY6G5B--991;CSNK2B-LY6G5B-1072;CSNK2B-LY6G5B-560;CSNK2B-LY6G5B-562	14.568	2	0.0235626	1.81339	15.5627	16.6007	17.3082	17.5749	18.3751	18.9616
B4DQX8;Q9UKG1	DCC-interacting protein 13-alpha	APPL1	71.339	2	0.0238099	1.8123	14.0376	12.5153	12.6097	15.4833	14.0575	15.0587
B4DPY2;O75400-2;O75400-3;O75400;Q4ZG51	Pre-mRNA-processing factor 40 homolog A	PRPF40A;FNBP3	92.897	2	0.0187897	1.79131	12.1536	12.5153	12.6097	14.3934	15.0878	13.1714
B3KXZ4;H0Y8E6;B7Z8Z6;P49736;Q9BWF4	DNA helicase;DNA replication licensing factor MCM2	MCM2	91.271	3	0.0507569	1.78695	11.0166	12.5153	13.8424	13.8438	14.7257	14.1656
P60866;P60866-2;E5RIP1;E5RJX2;G3XAN0	40S ribosomal protein S20	RPS20	13.373	2	0.00414376	1.78028	18.7807	18.9458	19.3113	20.664	21.0808	20.6338
B4E3I9;Q8N516;Q4LE38;O95163;Q68DI5;F5H2T0;B3KXE7;B3KNB2	Elongator complex protein 1	IKBKAP;IKBKAP variant protein;DKFZp781H1425	138.11	5	0.00617189	1.77692	12.1536	12.5153	12.7187	13.9466	14.004	14.7679
E9PCY5;B4DKD0;Q71UH4;Q02880-2;Q02880	DNA topoisomerase 2;DNA topoisomerase 2-beta	TOP2B	130.48	3	0.054942	1.76701	12.1536	9.76225	12.5351	13.3399	13.1308	13.2813
Q15050	Ribosome biogenesis regulatory protein homolog	RRS1	41.193	2	0.00388618	1.73654	12.1536	12.5153	12.6097	14.2788	14.1207	14.0887
P62263;H0YB22;E5RH77	40S ribosomal protein S14	RPS14	16.273	4	0.0662223	1.72961	18.5128	16.6695	18.9825	20.8818	18.9234	19.5485
P27824;P27824-2;P27824-3	Calnexin	CANX	67.567	10	0.0809885	1.71136	18.2234	16.1519	15.0706	17.9143	17.8338	18.8318
M0QZC5;P62280	40S ribosomal protein S11	RPS11	13.997	2	0.00939206	1.70625	16.8143	16.6622	17.6418	18.9446	18.3464	18.9461
Q6IBR8;B5BU01;P20042;Q3B7I9;Q96I16	Eukaryotic translation initiation factor 2 subunit 2	EIF2S2	38.388	2	0.0337407	1.70492	12.0972	14.1344	12.5311	14.1662	15.1164	14.5949
A0A024QYX5;A0A0S2Z5C9;Q9UET6-2;Q9UET6;B7Z4K4;B3KN91	Putative tRNA (cytidine(32)/guanosine(34)-2-O)-methyltransferase	FTSJ1	36.079	2	0.0456091	1.6939	14.8076	12.5153	12.6097	15.2633	14.8984	14.8526
B4E2T6;A0A0B4J1W3;B2RBE5;Q9BXJ9;Q58F05;Q9BXJ9-4	N-alpha-acetyltransferase 15, NatA auxiliary subunit	NAA15;NARG1	86.54	4	0.0621633	1.68363	12.1536	12.5153	14.588	14.996	13.994	15.3177
Q9Y4W2-2;Q9Y4W2;B7Z381;Q9Y4W2-4;Q9Y4W2-3	Ribosomal biogenesis protein LAS1L	LAS1L	81.242	3	0.0486217	1.68183	12.7884	12.5153	12.6097	13.4012	15.8454	13.7122
F8VU65;Q53HW2;A8K4Z4;A0A024RBS2;P05388;F8VPE8;G3V210;Q6NSF2;F8VWS0;Q53HK9;P05388-2;Q8NHW5;F8VQY6;F8VRK7;F8VW21;B4E3D5;F8VS58;F8VZS0	60S acidic ribosomal protein P0;60S acidic ribosomal protein P0-like	RPLP0;RPLP0P6	27.187	6	0.0245296	1.66942	18.625	19.2573	20.073	20.3578	21.6908	20.915
B4DZ85;B4DF87;Q96E88;B2R5V0;A0A024QZI5;Q13772;Q13772-3;Q13772-4	Nuclear receptor coactivator 4	NCOA4	50.712	3	0.0906552	1.66812	14.7242	12.5153	13.0985	16.346	15.2193	13.777
Q13501;E7EMC7;Q13501-2;B4E3V2;E3WH17;E9PFW8	Sequestosome-1;Tyrosine-protein kinase receptor	SQSTM1;SQSTM1-ALK	47.687	6	0.165198	1.6652	16.6451	15.1496	15.2099	19.0764	17.955	14.9687
P35606-2;P35606	Coatomer subunit beta	COPB2	99.045	6	0.0903885	1.65475	13.3248	13.2882	16.02	15.9638	15.1543	16.4792
A0A024R5H0;O75531;B2R4V4	Barrier-to-autointegration factor;Barrier-to-autointegration factor, N-terminally processed	BANF1	10.058	3	0.425472	1.64866	12.1536	13.932	19.0046	18.1825	13.7583	18.0954
B7Z8K4;Q6FI03;Q5U0Q1;Q53HH4;Q13283;Q6ZP53;Q32P45	Ras GTPase-activating protein-binding protein 1	G3BP;DKFZp686L1159;G3BP1	31.511	2	0.0235494	1.64425	12.1536	12.5153	13.7244	13.9751	14.8933	14.4576
Q05CK9;B7Z645;Q59GL1;B2R8Z8;O60506-4;O60506-3;O60506-2;O60506;O60506-5	Heterogeneous nuclear ribonucleoprotein Q	SYNCRIP	50.65	6	0.0554888	1.63546	13.7489	16.1014	16.0613	17.14	16.8573	16.8207
A2RUU9;A6NNN6;E7ETA6;B9EIS5;D3DSQ0;Q15154-2;Q15154;B4DJ00;B4DWY1;A0A088AWL4;H0YBA1	Pericentriolar material 1 protein	PCM1	209.9	8	0.0338032	1.63329	12.1536	12.5153	12.6097	15.0895	14.1329	12.956
Q9BVA1	Tubulin beta-2B chain	TUBB2B	49.953	3	0.1619	1.61861	12.1536	14.5688	15.8288	15.9371	14.6	16.8699
E9PGG1;E7EUM4;E7ERR6;E7ERH4;E7ET01;E7ETL8;E7EQU2;E7ESD3;E7EMU4;E7EV09;E7EQL5;B4DPZ3;A0A140VKE9;Q13409-6;Q13409-3;Q13409-7;Q13409-2;Q13409-5;Q13409;Q53SA6;E7EU01;Q59GU5	Cytoplasmic dynein 1 intermediate chain 2	DYNC1I2;DNCI2	12.328	2	0.265431	1.61316	17.7272	16.5103	12.6097	15.9753	17.471	18.2404
C9J931;Q6NZ61;A8K005;A0A090N900;Q15382	GTP-binding protein Rheb	RHEB	8.6739	3	0.0765792	1.61168	15.6593	15.7418	18.2183	17.9766	17.7901	18.6877
Q9Y3I0;B4DNA0	tRNA-splicing ligase RtcB homolog	RTCB	55.21	3	0.0592215	1.59236	13.4985	15.1676	15.7585	15.7276	16.4326	17.0415
Q9Y678;B3KW21;Q8WUI6	Coatomer subunit gamma-1	COPG1;COPG	97.717	5	0.0186309	1.57823	12.6112	13.9858	13.4601	15.2969	14.8325	14.6624
Q15738;C9JDR0	Sterol-4-alpha-carboxylate 3-dehydrogenase, decarboxylating	NSDHL	41.9	3	0.106084	1.57653	16.6526	15.3163	13.3129	16.2381	16.8947	16.8785
Q5VVD0;P62913;Q08ES8;P62913-2	60S ribosomal protein L11	RPL11	20.252	3	0.0202478	1.57146	17.3073	18.739	18.5967	19.6711	19.827	19.8592
B4DMB5;P17812;B4E1E0;P17812-2	CTP synthase;CTP synthase 1	CTPS1	55.95	7	0.0227985	1.56956	16.3003	15.7411	16.744	17.5208	18.6094	17.3638
B4E0Q4;B4DZJ7;O00267-2;O00267;B4DJK4	Transcription elongation factor SPT5	SUPT5H	104.38	5	0.336454	1.56801	12.1536	12.5153	17.2534	14.2051	14.8614	17.5597
A0A024R534;O94776	Metastasis-associated protein MTA2	MTA2	75.022	2	0.0189259	1.55725	12.1536	12.5153	13.3732	13.9549	14.7105	14.0486
A0A0S2Z3L2;P16615;P16615-5;P16615-2;P16615-3;P16615-4;H7C5W9	Sarcoplasmic/endoplasmic reticulum calcium ATPase 2	ATP2A2	114.76	10	0.199342	1.55486	17.4285	15.2625	12.8271	16.9377	17.0061	16.239
B2R8A2;A0A024R7M0;Q9BVK6	Transmembrane emp24 domain-containing protein 9	TMED9	25.077	2	0.191082	1.54221	18.104	18.2254	14.358	17.8511	18.9083	18.5547
A0A0D9SFB3;A0A0D9SG12;B5BTY4;Q59GX6;A0A0D9SF53;O00571-2;O00571;Q5S4N1;A0A024R9A4;O15523-2;O15523;B4E010;B4DLU5	ATP-dependent RNA helicase DDX3X;ATP-dependent RNA helicase DDX3Y	DDX3X;DDX3Y	70.839	5	0.0505183	1.54212	14.1927	14.8872	16.2799	16.153	16.6003	17.2328
B4DII5;B4DWX3;O60684;O15131	Importin subunit alpha;Importin subunit alpha-7;Importin subunit alpha-6	KPNA6;KPNA5	59.64	2	0.0110833	1.53291	12.1536	12.5153	12.6097	14.2986	13.4869	14.0919
B3KXZ9;B2R642;A8K6A6;A0A024R3I5;P43121;P43121-2	Cell surface glycoprotein MUC18	MCAM	59.019	2	0.0530488	1.52869	14.2404	12.5153	12.6097	14.6115	13.9581	15.3819
K7ERI7;Q7Z4W8;P35268;K7EMH1	60S ribosomal protein L22	RPL22	11.168	3	0.0365061	1.52759	18.8894	18.7128	18.9029	21.2244	20.6047	19.2588
A0A140VJS3;P62195;P62195-2;J3QSE0;J3QQM1;Q59GS3	26S protease regulatory subunit 8	PSMC5	45.626	5	0.0412097	1.52609	14.6066	14.4853	15.849	16.419	15.7979	17.3022
B3KMI3;A8K6Q9;A0A024RDV9;Q8N0X7;A0A0S2Z510;B4DXT5;B3KML8	Spartin	SPG20	48.821	4	0.111951	1.50805	15.2283	12.5153	15.2366	16.3391	15.9488	15.2164
B4DM22;Q59EG8;Q13200;Q13041;Q13200-2;Q13200-3	26S proteasome non-ATPase regulatory subunit 2	PSMD2	99.313	5	0.0393575	1.50224	13.2787	13.9448	14.8179	15.3166	14.9769	16.2546
E7EX90;Q6MZZ3;Q14203-5;Q14203-2;Q14203-3;Q14203-4;Q14203-6;Q14203	Dynactin subunit 1	DCTN1;DKFZp686I0746	139.09	3	0.0158864	1.48939	12.1536	13.0073	12.6097	13.9795	13.7325	14.5268
P12532;P12532-2;B3KVA7;B2R8A3;A0A024RAK5;P17540	Creatine kinase U-type, mitochondrial;Creatine kinase S-type, mitochondrial	CKMT1A;CKMT2	47.036	2	0.0221268	1.48329	12.1536	12.5153	13.3463	13.7074	14.2999	14.4578
Q53XL8;Q53HB3;P62191-2;P62191;G3V4X1	26S protease regulatory subunit 4	PSMC1	49.184	2	0.111887	1.4718	15.0467	15.38	12.6097	16.0779	15.1623	16.2117
E5RHW4;O94905	Erlin-2	ERLIN2	37.725	3	0.295806	1.46443	18.158	15.939	12.6097	16.6822	16.9244	17.4934
E9KL35;P63244;D6RFX4;H0YAF8;D6R9Z1;J3KPE3;H0Y8W2;D6R9L0;B4DVD2;D6RHH4;H0YAM7;D6RFZ9;D6RAC2;D6REE5;D6RAU2;E9PD14;D6RBD0	Guanine nucleotide-binding protein subunit beta-2-like 1;Guanine nucleotide-binding protein subunit beta-2-like 1, N-terminally processed	GNB2L1	35.076	10	0.010509	1.46026	18.3971	18.4914	18.0491	19.6754	19.5843	20.0587
Q7Z726;Q6NVW7;A8K7D9;P52292;J3QLL0;J3KS65	Importin subunit alpha;Importin subunit alpha-1	KPNA2	57.875	8	0.0181143	1.45489	16.9302	15.9537	16.513	18.3258	17.727	17.7088
Q549N5;Q9Y5M8;H7C4H2	Signal recognition particle receptor subunit beta	SRPRB	29.702	3	0.20599	1.45232	16.8712	14.4997	12.6097	16.1822	16.6251	15.5303
Q15008;Q15008-4;C9J7B7;C9J0E9;B3KT66;Q15008-3;Q15008-2	26S proteasome non-ATPase regulatory subunit 6	PSMD6	45.531	2	0.0760595	1.45129	12.1536	14.2443	13.3712	14.2628	14.2365	15.6237
Q6IB11;O00264;O00264-2	Membrane-associated progesterone receptor component 1	PGRMC1	21.671	5	0.0602379	1.4431	17.8307	16.2299	15.8676	18.4494	17.491	18.3172
P62318-2;P62318	Small nuclear ribonucleoprotein Sm D3	SNRPD3	13.291	2	0.0370259	1.44094	17.0161	17.8895	16.6906	19.0312	19.0204	17.8675
B4DMT4;B4DXP9;R4GMT0;B4DM97;P61163	Alpha-centractin	ACTR1A	34.514	3	0.189026	1.4382	12.1536	15.5159	15.1584	14.7599	15.7407	16.6419
F2Z2C0;A8QI98;Q9Y2L1	Exosome complex exonuclease RRP44	DIS3	63.616	3	0.115722	1.42314	12.1536	12.5153	14.6523	14.2612	13.8928	15.4367
B4DY16;A0A024R1U0;P46060;B4E0U0	Ran GTPase-activating protein 1	RANGAP1	57.758	11	0.0722294	1.41573	17.1226	16.4565	18.1694	18.167	19.6875	18.1411
Q14730;B5BUB5;P05455;Q9UMH5;E9PGX9;E7ERC4	Lupus La protein	SSB	33.758	2	0.236023	1.41384	12.1536	13.1409	15.5547	16.4813	13.4285	15.1809
Q3B7A7;Q59HH3;P22102;Q15374;P22102-2	Trifunctional purine biosynthetic protein adenosine-3;Phosphoribosylamine--glycine ligase;Phosphoribosylformylglycinamidine cyclo-ligase;Phosphoribosylglycinamide formyltransferase	GART	107.72	8	0.10331	1.40869	16.1297	13.2758	14.9799	16.4924	15.9098	16.2093
Q14008-2;Q14008;Q14008-3	Cytoskeleton-associated protein 5	CKAP5	218.52	6	0.117399	1.40055	12.8558	10.5554	12.6097	14.3785	13.2428	12.6012
B4DUQ3;B2R7C2;O43264-2;O43264;F5H3C1	Centromere/kinetochore protein zw10 homolog	ZW10	30.237	2	0.130752	1.39491	12.1536	12.7732	13.7492	12.6738	14.8441	15.343
H3BMF4;Q9H2V7-3;Q9H2V7-2;Q9H2V7;H3BT44;H3BPT8;H3BPQ9;Q59FQ8;A0A024QZ93;H3BR82;Q9H2V7-5;Q9H2V7-4	Protein spinster homolog 1	SPNS1;SPIN1	61.105	2	0.163235	1.38979	15.7869	15.3454	12.6097	16.2867	15.2542	16.3705
F8WF02;C9J634;P11177-2;P11177;Q59G68;P11177-3	Pyruvate dehydrogenase E1 component subunit beta, mitochondrial	PDHB	27.65	2	0.0303755	1.36233	12.1536	12.5153	12.6097	13.6528	13.1921	14.5207
E7EU96;B5BUH5;B2R6D7;Q5U5J2;Q8NEV1;P68400;Q2I0Y7	Casein kinase II subunit alpha 3;Casein kinase II subunit alpha	CSNK2A1;CSNK2A3	45.31	5	0.0411568	1.36008	15.2502	16.6569	16.7034	17.2983	17.6347	17.7577
B4DMP7;Q16186;A0A087WUX6;Q68E00;A0A087WX59	Proteasomal ubiquitin receptor ADRM1	ADRM1;DKFZp686G2045	20.828	2	0.0707913	1.34153	13.8551	14.7421	12.6097	15.002	14.7796	15.45
Q9UNS2;J3QL22;J3QS85;J3KTQ1;J3QKR0;B4DN01;C9JLV5;H7C3P9;Q9UNS2-2	COP9 signalosome complex subunit 3	COPS3	47.873	2	0.211415	1.32978	11.6967	14.2948	15.3968	14.3397	15.4704	15.5676
B4DUQ1;A0A024R228;Q6IBN1;Q5EC54;P61978-3;P61978;P61978-2;B4DFF1;B3KU16;Q5T6W2	Heterogeneous nuclear ribonucleoprotein K	HNRPK;HNRNPK	48.51	7	0.153509	1.3248	15.3865	16.8155	18.1609	17.494	17.6747	19.1686
B4DVL8;Q6PJ76;Q9BVJ8;B4DVA7;A0A0S2Z3L7;H3BS10;A0A0S2Z3W3;H3BP20;P06865	Beta-hexosaminidase;Beta-hexosaminidase subunit alpha	HEXA	34.579	4	0.205545	1.32381	13.3019	13.2654	16.4564	15.102	15.3997	16.4935
B4DP70;F1T0B3;A0A087X2G1;A3RJH1;Q92499;Q92499-3;Q92499-2	ATP-dependent RNA helicase DDX1	DDX1	59.196	2	0.0539312	1.32241	12.793	12.3185	12.6097	13.9649	14.776	12.9476
Q6FID4;Q5SQT9;B2R679;Q9NR31;H0Y5E8;Q9NR31-2	GTP-binding protein SAR1a	SARA1;SAR1A	22.338	2	0.0596862	1.31427	16.1071	18.039	17.327	18.2919	18.6043	18.5196
D6RBD7;C9J1V9;O43324-2;O43324;D6RCQ0;H0YAL7	Eukaryotic translation elongation factor 1 epsilon-1	EEF1E1;EEF1E1-BLOC1S5	16.686	2	0.0501026	1.31325	14.8927	15.402	16.1304	16.4998	16.3384	17.5267
B7Z1V7;B7Z4V2;V9HW84;P38646;Q8N1C8;B7Z4T3	Stress-70 protein, mitochondrial	HEL-S-124m;HSPA9	47.362	10	0.377051	1.31155	18.4756	16.0496	12.6097	17.9066	16.4179	16.7451
E9PK01;P29692;E9PMW7;E9PPR1;E9PL12;E9PQ49;E9PI39;A0A087X1X7;Q71RH4;Q9H7G6;D3DWK1;B2RAR6;E9PRY8;P29692-3;P29692-2;E9PN91;E9PIZ1;E9PL71;H0YCK7;Q9BW34;E9PQZ1;P29692-4	Elongation factor 1-delta	EEF1D	28.821	6	0.0430989	1.3078	18.2385	18.3713	18.7387	19.5184	20.6176	19.136
D3DP78;A0A140VJW5;P14868-2;P14868;Q53T60	Aspartate--tRNA ligase, cytoplasmic	DARS	53.464	7	0.0369821	1.30734	15.2266	14.8352	16.1924	16.8063	16.4668	16.903
O75976-2;O75976;B7Z843	Carboxypeptidase D	CPD	126.49	4	0.113498	1.30494	14.5283	13.9916	12.0425	14.8187	14.3828	15.2757
B5MCD7;O43759-2;O43759;A2A283;F8WCE4;O43759-3	Synaptogyrin-1	SYNGR1	18.465	2	0.38888	1.30097	17.9458	17.9663	12.6097	17.2981	17.9157	17.2109
Q09028-3;Q09028;Q09028-4;Q09028-2;H0YEU5;B4DRT0;H0YCT5;H0YF10;H0YDK2	Histone-binding protein RBBP4	RBBP4	46.158	4	0.068388	1.29395	15.5371	16.658	17.3734	17.3612	17.7888	18.3003
K7EP16;Q6IAM0;O75821;K7ER90;K7EL20;K7ENA8;A8K5K5	Eukaryotic translation initiation factor 3 subunit G	EIF3G	13.212	2	0.0366663	1.29296	14.3935	14.768	15.2686	15.4711	16.5313	16.3065
A6NJU6;A6NFX8;Q9UKK9;A6NCQ0	ADP-sugar pyrophosphatase	NUDT5	20.629	3	0.0276598	1.28943	15.9805	14.9495	15.8368	16.9213	16.9415	16.7723
I3L1P8;Q6IBH0;Q02978-2;Q02978	Mitochondrial 2-oxoglutarate/malate carrier protein	SLC25A11	32.182	2	0.152374	1.28684	15.2942	12.5153	12.6097	15.0179	14.71	14.5517
O43776;K7EMQ6;K7EPK2;K7EQ35;B4DF91;B4DGT6;B4DN60	Asparagine--tRNA ligase, cytoplasmic	NARS	62.942	2	0.074623	1.28498	12.6389	14.0678	13.8595	13.949	15.3381	15.134
Q68DQ4;B2R5T5;P10644-2;P10644;K7EM13;K7EPB2	cAMP-dependent protein kinase type I-alpha regulatory subunit;cAMP-dependent protein kinase type I-alpha regulatory subunit, N-terminally processed	DKFZp779L0468;PRKAR1A	42.947	6	0.043679	1.27633	15.7517	16.6802	15.3784	17.6123	17.1879	16.8391
Q14165;F5H1S8;F5GX14	Malectin	MLEC	32.233	2	0.237672	1.24916	16.0445	12.5153	12.6097	14.8216	14.902	15.1934
E9PLT0;Q9GZV0;A0A024R0K2;A0A024R0E2;O75534-2;O75534;O75534-3;O75534-4;Q8WU01;Q9UG93;Q96L66	Cold shock domain-containing protein E1	CSDE1;DKFZp586J0620;UNR	74.583	2	0.0380264	1.24008	13.2291	12.5153	12.6097	13.4304	14.4115	14.2325
P60520;H3BSM5;H3BQ50	Gamma-aminobutyric acid receptor-associated protein-like 2	GABARAPL2	13.667	4	0.0645237	1.2342	18.1203	19.6563	18.3515	20.2287	20.1161	19.4859
P30050;Q59FI9;P30050-2;D3DS95	60S ribosomal protein L12	RPL12;hCG_21173	17.818	6	0.118022	1.23331	18.1423	19.5108	18.8816	19.0085	21.2182	20.0079
Q53Y83;Q53HF3;P06280	Alpha-galactosidase A	GLA	48.766	4	0.0487366	1.22274	16.137	15.138	15.0479	16.2273	16.6417	17.122
P21796;B3KTS5;B4DEI3;C9JI87	Voltage-dependent anion-selective channel protein 1	VDAC1	30.772	6	0.283303	1.21861	19.6512	16.712	15.3654	18.843	18.4289	18.1126
E9PKD5;E9PM69;R4GNH3;A8K781;A0A140VK42;P17980;E9PMD8;E9PN50	26S protease regulatory subunit 6A	PSMC3	34.614	5	0.22007	1.21852	12.6792	16.012	15.6726	15.9153	15.7378	16.3663
V9HW39;Q9NR45;Q5TBR0;Q5TBR1	Sialic acid synthase	HEL-S-100;NANS	40.321	2	0.21196	1.21602	12.1536	15.0463	15.1083	15.3512	15.962	14.643
O15230	Laminin subunit alpha-5	LAMA5	399.73	16	0.277976	1.20654	10.8349	13.0796	12.452	15.4397	12.3524	12.194
Q96AG4	Leucine-rich repeat-containing protein 59	LRRC59	34.93	4	0.396458	1.2047	18.0608	14.6186	12.6097	17.0729	16.5814	15.2491
A0A024R3R5;Q14739	Lamin-B receptor	LBR	70.729	2	0.181516	1.20111	15.4345	14.891	12.6097	14.8148	15.8018	15.9219
B4DLA6;B3KMX0;A0A024R7U6;P33991	DNA replication licensing factor MCM4	MCM4	92.722	3	0.069574	1.20002	12.1536	12.5153	13.4477	13.5058	13.59	14.6209
A0A075B6F6;A0A0S2Z6F0;A0A0S2Z5V7;Q8TCT9-5;Q8TCT9;Q8TCT9-4;Q8TCT9-2;A0A0C4DGU3	Minor histocompatibility antigen H13	HM13	30.162	2	0.203982	1.19919	15.663	13.5447	12.6097	14.9972	15.9552	14.4626
Q32Q67;G8JLD5;D3DUW7;D3DUW6;B4DYR6;D3DUW5;O00429-7;O00429-4;O00429-5;O00429-3;O00429-2;O00429;O00429-8;O00429-6	Dynamin-1-like protein	DNM1L	64.147	2	0.0976301	1.19664	12.1536	12.5153	12.6097	13.5043	12.6005	14.7638
O60493-2;O60493-4;O60493	Sorting nexin-3	SNX3	14.766	2	0.28521	1.18917	12.1536	16.1453	15.3923	15.2444	16.1433	15.8711
P07814;H6WCP5;V9GYZ6;Q3KQZ8;B4DKX5	Bifunctional glutamate/proline--tRNA ligase;Glutamate--tRNA ligase;Proline--tRNA ligase	EPRS	170.59	9	0.048701	1.18472	14.7021	14.0104	15.2582	15.6756	15.6608	16.1885
O94906-2;O94906	Pre-mRNA-processing factor 6	PRPF6	102.43	6	0.232528	1.17626	12.1536	13.6167	12.6097	14.7235	15.1536	12.0317
H0YJC0;V9HW24;A0A087X2I1;P62333;B4DR91;H0YJS8	26S protease regulatory subunit 10B	PSMC6;HEL-S-73	29.541	5	0.149319	1.1698	14.8618	17.0706	16.6621	17.0798	16.8252	18.199
H0Y4R1;P12268;B7Z1G4;Q6QE17	Inosine-5-monophosphate dehydrogenase 2	IMPDH2	50.957	10	0.0311772	1.1641	17.8285	17.8583	18.5308	19.2561	19.1218	19.3321
Q6FGH9;P63167;F8VXI7;F8VXL2;F8VRV5;Q96FJ2	Dynein light chain 1, cytoplasmic;Dynein light chain 2, cytoplasmic	DNCL1;DYNLL1;DYNLL2	10.366	2	0.0924855	1.15927	16.0638	17.1202	18.0477	18.3889	17.9658	18.3548
A0A024R8T9;O43760;O43760-2;K7ELD9;K7ENG9;K7ELS8;K7EJ35	Synaptogyrin;Synaptogyrin-2	SYNGR2	24.81	2	0.109672	1.15401	19.6367	18.9857	17.5211	20.1948	19.6072	19.8035
E9PCY7;G8JLB6;P31943;E5RGV0;D6RIU0;D6RBM0;E7EQJ0;D6RAM1;D6R9T0;D6RFM3;D6RIT2;D6RDU3;D6RJ04;D6RIH9;E7EN40	Heterogeneous nuclear ribonucleoprotein H;Heterogeneous nuclear ribonucleoprotein H, N-terminally processed	HNRNPH1	47.087	7	0.120744	1.14651	16.7858	15.9154	17.7584	18.6033	18.1355	17.1604
D6R9P3;D6RD18;B4DMY3;D6RBZ0;Q53F64;Q99729-3;Q99729-2;Q99729-4;Q99729	Heterogeneous nuclear ribonucleoprotein A/B	HNRNPAB	30.302	2	0.201809	1.1403	14.6294	12.5153	15.6839	15.3973	15.3212	15.5309
A0A024RCU9;A8K8B2;H3BLV9;Q96SB4-4;Q96SB4;Q96SB4-3	SRSF protein kinase 1	SRPK1	61.962	2	0.157939	1.13882	12.1536	12.5153	12.6097	14.666	13.9814	12.0477
A0A087WUL2;P49720;A0A087WXQ8;A0A087WY10	Proteasome subunit beta type-3	PSMB3	16.161	3	0.204402	1.13338	14.1886	17.2728	16.2411	17.4779	16.8831	16.7417
A0A024RAM0;Q92973-2;Q92973;Q92973-3	Transportin-1	TNPO1	102.35	3	0.071641	1.13245	12.1536	13.5292	12.8743	13.5022	14.4024	14.0499
Q53FV3;B3KM48;A0A0S2Z5H7;D6RAX7;D6RFN0;Q9BT78-2;Q9BT78;D6RD63	COP9 signalosome complex subunit 4	COPS4	46.267	2	0.198434	1.1262	12.225	13.4873	12.6097	12.2688	14.9606	14.4712
Q8TCJ8;Q8NCK5;B2RDP6;A0MNN5;Q9BQ67;M0QX71	Glutamate-rich WD repeat-containing protein 1	DKFZp564C172;GRWD1	49.447	2	0.222448	1.12356	12.1536	12.5153	13.9859	14.0908	12.5805	15.3541
A0A024R883;O75348;F2Z307;O95670-2;O95670	V-type proton ATPase subunit G 1;V-type proton ATPase subunit G 2	ATP6V1G1;ATP6V1G2-DDX39B;ATP6V1G2	13.757	3	0.139818	1.12248	15.343	17.7921	16.5371	17.7743	17.3928	17.8725
A8KA19;O43592;F8WDU6;A0A024RB67	Exportin-T	XPOT	109.92	2	0.0612777	1.11756	12.1536	11.5735	11.9702	12.5618	12.7318	13.7565
V9HWC6;P23284	Peptidyl-prolyl cis-trans isomerase;Peptidyl-prolyl cis-trans isomerase B	HEL-S-39;PPIB	22.742	7	0.301383	1.11165	19.7735	19.1348	16.2144	20.2473	19.691	18.5193
Q6IPN0;F8W914;Q9NQC3-2;Q9NQC3-5;Q9NQC3;A0A0U1RQR6;Q53R94;Q53SY1;A6XGP7;H7C106;D6W5C2;Q9NQC3-3;Q9NQC3-4;Q9NQC3-6	Reticulon;Reticulon-4	RTN4;NOGOC	36.918	2	0.119468	1.10766	17.383	15.5956	15.4936	17.1853	17.6123	16.9975
Q71U36-2;Q71U36;Q1ZYQ1;Q13748;B4DQK4;Q9UQM3;Q13748-2;Q6PEY2	Tubulin alpha-1A chain;Tubulin alpha-3C/D chain;Tubulin alpha-3E chain	TUBA1A;TUBA2;TUBA3C;TUBA3E	46.297	2	0.302793	1.10674	14.0038	15.9384	17.0509	15.7716	16.1579	18.3838
F8W118;F8VV59;B7Z9C2;A0A024RBE6;P55209-3;F8VRJ2	Nucleosome assembly protein 1-like 1	NAP1L1	24.694	8	0.068763	1.10049	18.5738	19.6213	19.8786	20.6419	20.6059	20.1274
O00116;B7Z3Q4;A0A1B0GWA2;B8ZZ81	Alkyldihydroxyacetonephosphate synthase, peroxisomal	AGPS	72.911	6	0.41591	1.09994	16.3728	12.5153	12.6097	15.8134	15.9844	12.9998
A8K335;Q92820	Gamma-glutamyl hydrolase	GGH	36.047	2	0.264586	1.09479	15.5632	12.5153	12.6097	14.4979	14.0839	15.3907
Q96AZ4;A0A087WU14;B4DP10;B4E2V7;A0A087WXB0;A8K2G0;O15126	Secretory carrier-associated membrane protein 1	SCAMP1	15.388	2	0.0622768	1.09081	17.8032	18.7544	18.0322	19.8003	18.9214	19.1404
E9PKG1;H7C2I1;Q99873-3;Q99873-2;Q99873-4;Q99873;Q5U8W9;E9PIX6;B4DJ87;E9PQ98;A0A087X1W2	Protein arginine N-methyltransferase 1	PRMT1;HRMT1L2	37.709	7	0.0585497	1.08931	16.2743	17.2753	16.8073	17.5437	17.7709	18.3104
B4DJ66;Q53GN6;B2RBM7;A0A024R201;Q9UNM6;Q9UNM6-2;J3KNQ3;Q9Y6E3;A0A087WUL9	26S proteasome non-ATPase regulatory subunit 13	PSMD13	35.347	3	0.251513	1.08875	12.1536	14.2383	14.8702	14.1285	14.3326	16.0672
C9JYN0;Q16563-2;A0A0U1RQT9;A8K865;A4D0R1;Q16563	Synaptophysin-like protein 1	SYPL1;SYPL	24.784	2	0.0302415	1.08702	17.0494	17.0665	16.9577	18.1196	17.9431	18.2719
Q6FHJ5;O14828;O14828-2	Secretory carrier-associated membrane protein 3	SCAMP3	38.242	9	0.052495	1.08691	19.0192	19.9836	19.0171	20.4009	20.5567	20.3231
P54136;P54136-2;B4DXW6	Arginine--tRNA ligase, cytoplasmic	RARS	75.378	7	0.100504	1.0819	16.0721	14.7748	16.0529	17.0595	16.0352	17.0508
F8VPD4;P27708;Q53SY7	CAD protein;Glutamine-dependent carbamoyl-phosphate synthase;Aspartate carbamoyltransferase;Dihydroorotase	CAD	236.02	8	0.137716	1.07643	12.6434	13.9903	14.6855	14.521	14.5809	15.4465
A0A024R3X7;Q9UNM1;B8ZZL8;P61604;B8ZZ54;S4R3N1	10 kDa heat shock protein, mitochondrial	HSPE1;EPFP1;HSPE1-MOB4	7.5406	2	0.542797	1.07499	19.7642	17.7709	12.6097	18.3913	17.721	17.2575
P08243-2;P08243;P08243-3;F8WEJ5;B4DY32	Asparagine synthetase [glutamine-hydrolyzing]	ASNS	62.168	5	0.0474476	1.06813	16.3809	15.5797	16.3336	17.2627	16.9956	17.2402
P62304;A6NHK2	Small nuclear ribonucleoprotein E	SNRPE	10.803	2	0.123612	1.06738	16.8055	18.318	18.6809	19.1713	19.2683	18.567
O95373;B3KQG6	Importin-7	IPO7	119.52	8	0.0539759	1.06672	15.0498	15.3433	15.9937	16.2628	16.7826	16.5415
F8VVM2;Q8NCF7;Q53HC3;B2RE88;A0A024RBE8;A0A024RBH9;Q00325-2;Q00325	Phosphate carrier protein, mitochondrial	SLC25A3	36.161	3	0.399825	1.06602	18.8828	17.2936	13.9327	17.8017	17.3118	18.1937
Q96HX3;Q6IBR0;Q53EP4;P04843;B7Z4L4;B4DL99;B4DNJ5	Dolichyl-diphosphooligosaccharide--protein glycosyltransferase subunit 1	RPN1	64.581	10	0.307024	1.06449	18.3049	16.6432	14.3265	17.1765	17.7031	17.5885
A0A024RDY0;O00410;O00410-3;H0Y8C6;O00410-2;B4E0R6;B3KWG6	Importin-5	RANBP5;IPO5	123.63	12	0.0914536	1.05657	15.0076	14.3631	15.3059	16.6208	15.2328	15.9928
A0A024R7L5;A0A024R7L8;Q92900-2;Q92900	Regulator of nonsense transcripts 1	UPF1	123.03	2	0.0748141	1.04978	11.5217	12.5153	11.1627	12.6575	12.9024	12.7891
H0Y3P2;D3DQV9;Q59G42;B4DZF2;P78344-2;P78344;Q2TU89	Eukaryotic translation initiation factor 4 gamma 2	EIF4G2;AAG1	98.117	3	0.188789	1.04373	12.1536	12.5153	12.6097	13.5871	14.7559	12.0668
E9PDF6;B0I1S9;O43795-2;O43795	Unconventional myosin-Ib	MYO1B	128.48	6	0.137506	1.04279	13.1386	12.5685	14.6538	14.2521	14.5506	14.6866
E7EMD0;B4DDH3;B4DKM8;B4DJI8;Q63HL4;B2R6E5;A8K3B4;Q59ED7;H0Y4R2;P16435;B4E305	NADPH--cytochrome P450 reductase	POR;DKFZp686G04235	47.401	2	0.220126	1.03468	15.0898	12.5153	12.6097	14.366	14.8515	14.1013
F2Z3I4;Q5T371;Q5T370;Q8N5I2	Arrestin domain-containing protein 1	ARRDC1	13.303	2	0.355197	1.03415	16.3709	16.0895	12.6097	16.695	16.1868	15.2907
A0A024RDQ0;A0A024RDS1;Q92598-2;Q92598-3;Q92598;B4DF68;Q92598-4;B4DY72;A0A0A0MSM0;B4DZB4	Heat shock protein 105 kDa	HSPH1	92.115	6	0.0996595	1.02587	15.5094	14.6624	16.3319	16.641	16.5766	16.3639
A0A024R3W7;P24534;F8WF65;F2Z2G2;C9JZW3;A4D1M6	Elongation factor 1-beta	EEF1B2;LOC392793	24.763	2	0.108845	1.02077	16.9462	17.0963	18.4713	18.3907	18.881	18.3045
F8VYN9;P40616-2;P40616;F8VP99;F8VP63;B4DZG7;B4DR16	ADP-ribosylation factor-like protein 1	ARL1	21.778	2	0.167504	1.01667	15.0928	17.1724	15.9235	16.3997	17.579	17.26
O14980;B3KWD0;B7ZB16;B4DR01	Exportin-1	XPO1	123.38	6	0.13733	1.01341	14.4895	12.6075	13.5172	15.0808	14.2613	14.3123
Q53FA5;P60468;S4R3B5	Protein transport protein Sec61 subunit beta	SEC61B	10.043	2	0.533367	1.00917	19.2528	16.943	12.6097	17.141	16.8876	17.8044
P53618;E9PP73	Coatomer subunit beta	COPB1	107.14	4	0.285841	1.00491	11.8384	10.1592	11.5118	13.3545	10.4415	12.728
Q13867;K7ESE8;J3KSD8;K7ES02;B4DXF3	Bleomycin hydrolase	BLMH	52.562	5	0.389476	1.00208	16.2399	12.5153	15.909	17.1237	15.0835	15.4631
F8VY02;V9HW71;P30040	Endoplasmic reticulum resident protein 29	ERP29;HEL-S-107	18.116	4	0.293015	1.00003	17.306	16.164	14.2826	17.6821	17.2172	15.8534
F8VZJ2;H0YHX9;A0A024RB41;Q13765;E9PAV3-2;E9PAV3;B4DDI8;F8W0W4;F8W1N5;F8VNW4	Nascent polypeptide-associated complex subunit alpha;Nascent polypeptide-associated complex subunit alpha, muscle-specific form	NACA;hCG_2016482	15.016	5	0.063071	0.999646	17.5981	18.1807	18.4406	19.3734	18.8362	19.0086
A0A140VK70;P35998;Q75L23;P35998-2	26S protease regulatory subunit 7	PSMC2	48.633	8	0.1193	0.999257	15.3889	16.4395	16.833	16.8414	16.9816	17.8361
B7ZM73;Q7Z3U7-2;Q7Z3U7-6;Q7Z3U7-5;Q7Z3U7;F8VZV1	Protein MON2 homolog	MON2	187.32	6	0.500676	0.993985	10.1659	16.046	14.0094	13.6248	15.0504	14.5281
Q6I9T8;B3KUN1;P67775-2;P67775;B3KQ51;Q8WZ56;Q5U0I7;B3KRM2;A0A140VJS0;P62714;H0YBN9	Serine/threonine-protein phosphatase;Serine/threonine-protein phosphatase 2A catalytic subunit alpha isoform;Serine/threonine-protein phosphatase 2A catalytic subunit beta isoform	PPP2CA;PPP2CB	35.55	4	0.190019	0.989568	14.9178	17.0155	17.0385	16.9227	17.3598	17.658
Q9BS26	Endoplasmic reticulum resident protein 44	ERP44	46.971	3	0.0912961	0.985719	14.2002	14.278	14.9048	14.7775	15.9571	15.6056
Q6P0M4;Q7Z355;J3KR24;Q7Z3U5;A0A0A0MSX9;Q59G75;P41252;B4DVX2	Isoleucine--tRNA ligase, cytoplasmic	IARS;DKFZp686L17145;DKFZp686L0869	120.63	8	0.149706	0.985157	15.1883	14.1286	15.9311	15.8349	15.6688	16.6999
I3L0H8;B4DS24;Q2NL95;Q9HBZ9;Q7Z4W5;Q53G16;F6QDS0;A0A0U4B4U6;H3BQK0;Q9UMR2-2;Q9UMR2-4;Q9NUU7;Q9UMR2;H3BTB3;H3BMQ5;H3BN59;Q59FQ9;Q68DY7;B4DL69;Q69YM2;A0A024QZ90;I3L352;Q9UMR2-3;Q9NUU7-2	ATP-dependent RNA helicase DDX19B;ATP-dependent RNA helicase DDX19A	DDX19A;DDX19B;DKFZp686C21137;hCG_1998531;DKFZp762C1313	50.519	2	0.108724	0.981162	12.9835	14.3248	14.3291	14.6683	14.7326	15.18
Q9H9B4;D6RDG7;S4R2X2;D6RFI0	Sideroflexin-1	SFXN1	35.619	3	0.473262	0.979182	18.235	15.4363	12.6097	16.4889	16.3763	16.3533
B4DY09;Q53FG3;F4ZW63;F4ZW62;Q12905	Interleukin enhancer-binding factor 2	ILF2	38.91	3	0.403054	0.976118	12.1536	16.6009	15.2554	15.3948	16.2511	15.2923
O95061;Q59ES5;B3KXH8;B2RAU5;Q9Y5X1	Sorting nexin;Sorting nexin-9	WISP;SNX9	35.815	2	0.413659	0.973975	16.1004	12.5153	16.8355	15.4148	16.2888	16.6694
I4AY87;P14174	Macrophage migration inhibitory factor	MIF	12.476	2	0.324362	0.972458	20.0569	16.8334	17.3527	19.9174	18.8064	18.4365
Q53Y51;P30046;J3KQ18;H7C342;B4DJQ7;A0A0F7RPW6;B5MC82;B4E259;P30046-2;A6NHG4	D-dopachrome decarboxylase;D-dopachrome decarboxylase-like protein	DDT;DDTL	12.712	4	0.138914	0.967126	16.1103	16.1359	15.5251	17.2013	15.8689	17.6025
B3KRK8;B0YJC4;V9HWE1;P08670;Q53HU8;A0A1B0GTT5;Q5JVS8;A0A1B0GUA0;B0YJC5	Vimentin	VIM;HEL113	46.976	4	0.351949	0.96115	14.607	12.7858	15.3608	13.4814	16.2956	15.8602
Q15645	Pachytene checkpoint protein 2 homolog	TRIP13	48.55	2	0.122234	0.960767	13.5326	13.165	13.543	13.7316	14.0671	15.3241
R4SBI6;Q6FGZ3;P07099	Epoxide hydrolase 1	EPHX1	52.948	4	0.29142	0.960247	16.4653	13.7366	13.4713	15.1972	15.9392	15.4175
A0A0U1RQF0;P49327	Fatty acid synthase;[Acyl-carrier-protein] S-acetyltransferase;[Acyl-carrier-protein] S-malonyltransferase;3-oxoacyl-[acyl-carrier-protein] synthase;3-oxoacyl-[acyl-carrier-protein] reductase;3-hydroxyacyl-[acyl-carrier-protein] dehydratase;Enoyl-[acyl-carrier-protein] reductase;Oleoyl-[acyl-carrier-protein] hydrolase	FASN	273.2	37	0.12724	0.958408	17.0617	16.7829	17.9989	18.1096	17.6923	18.9168
P36405	ADP-ribosylation factor-like protein 3	ARL3	20.455	2	0.371729	0.956478	16.5039	15.9185	12.6097	16.1663	15.8194	15.9158
A0A0S2Z575;A0A0S2Z583;Q8TC12-2;Q8TC12;H0YJ10;H0YIZ8;G3V2G6;G3V234;B3KQ19;H0YJ46;Q8TC12-3	Retinol dehydrogenase 11	RDH11	26.332	2	0.368965	0.950378	16.4499	15.0383	12.6097	15.831	16.2758	14.8424
Q5U0A0;A0A109NGN6;P28066	Proteasome subunit alpha type;Proteasome subunit alpha type-5	PSMA5	26.425	4	0.142557	0.948114	16.5227	17.6221	16.4967	18.3191	17.0193	18.1475
B4DWN1;A8K7T4;Q12907;D6RIU4;D6RDX1;D6RBV2	Vesicular integral-membrane protein VIP36	LMAN2	32.577	4	0.184078	0.940526	17.3369	16.2608	15.1392	17.5622	16.9279	17.0684
F5GY37;J3KPX7;Q99623;B4DW05;F5GWA7;Q99623-2	Prohibitin-2	PHB2	29.723	5	0.433583	0.939251	18.7965	15.72	14.0268	17.1087	16.9634	17.2889
A8K9U6;Q7Z2W4;C9J6P4;Q7Z2W4-2;Q7Z2W4-3;Q05DV5	Zinc finger CCCH-type antiviral protein 1	ZC3HAV1	101.46	11	0.163445	0.934312	16.2427	15.0428	14.3015	16.5158	15.9161	15.9581
B5BUB1;Q9Y265;Q9Y265-2;E7ETR0;B3KRS7	RuvB-like 1	RUVBL1	50.215	11	0.0527004	0.929732	17.7512	17.7374	17.5259	18.6349	18.5106	18.6582
Q9H8S9;Q9H8S9-2;Q7L9L4;Q7L9L4-2	MOB kinase activator 1A;MOB kinase activator 1B	MOB1A;MOB1B	25.079	2	0.510203	0.929518	17.3402	17.9382	12.6097	16.6991	16.8287	17.1489
A0A024RDG1;O60763;O60763-2	General vesicular transport factor p115	VDP;USO1	107.89	6	0.294739	0.928026	12.1536	14.6146	14.0204	13.9759	15.7069	13.89
B4DDM6;J3QT28;A0A140VJF3;O43684-2;O43684	Mitotic checkpoint protein BUB3	BUB3	28.239	2	0.229527	0.922645	14.8442	14.902	16.7864	17.0192	15.6123	16.669
Q9H834;H0Y2W2;Q96T67;Q9NVI7-3;Q9NVI7-2;Q5T9A4-3;Q9NVI7;Q5T9A4;Q8N3E6;Q5T2N8	ATPase family AAA domain-containing protein 3A;ATPase family AAA domain-containing protein 3B;ATPase family AAA domain-containing protein 3C	ATAD3A;ATAD3B;DKFZp761L1023;ATAD3C	53.519	3	0.402048	0.922183	16.5766	14.7796	12.6097	15.9182	14.544	16.2703
D6RJ96;B3KNM0;Q53ZP9;A0A140VKE7;O95757;E9PDE8;B4DXT2;B4DZR0	Heat shock 70 kDa protein 4L	HSPA4L	59.196	4	0.225657	0.922145	14.0229	12.5153	14.0045	15.5634	13.9523	13.7933
A0A024R4U3;Q14166	Tubulin--tyrosine ligase-like protein 12	TTLL12	74.403	4	0.429055	0.918443	12.0845	16.2378	15.6902	14.898	15.9504	15.9194
A0A024R3J7;P46977-2;P46977	Dolichyl-diphosphooligosaccharide--protein glycosyltransferase subunit STT3A	hCG_2032701;STT3A	80.428	2	0.361312	0.912788	16.0074	12.4162	12.966	14.7262	14.8226	14.5792
Q5RKT7;B2RDW1;P62979;J3QS39;J3QTR3;F5H6Q2;Q3MIH3;F5GYU3;F5H2Z3;F5H265;Q5UGI3;B4DV12;F5H388;F5H747;F5GXK7;J3QKN0;Q5U5U6;Q5PY61;Q9UFQ0;Q96C32;Q96MH4;L8B4I8;L8B196;Q96H31;L8B4R0;A8K674;L8B4Z6;L8B4M0;L8B4J3;Q66K58;Q59EM9;P62987;P0CG47;P0CG48;M0R1V7;Q49A90;M0R1M6;J3QSA3;F5GZ39;Q8WYN9	Ubiquitin-40S ribosomal protein S27a;Ubiquitin;40S ribosomal protein S27a;Ubiquitin-60S ribosomal protein L40;Ubiquitin;60S ribosomal protein L40;Polyubiquitin-B;Ubiquitin;Polyubiquitin-C;Ubiquitin	RPS27A;HEL112;UBB;UBC;UBA52;DKFZp434K0435;UbC	17.905	10	0.14146	0.910962	24.7213	24.6706	25.4234	25.9956	25.0175	26.5351
B2RE46;P04844-2;P04844;Q5JYR4;B4DJL0;Q5JYR7	Dolichyl-diphosphooligosaccharide--protein glycosyltransferase subunit 2	RPN2	69.333	4	0.161217	0.909493	15.7202	15.6953	14.2867	15.5361	16.4831	16.4114
B4DJ21;Q9H3S7;B4DJ12;B4DST5	Tyrosine-protein phosphatase non-receptor type 23;Protein-tyrosine-phosphatase	PTPN23	100.72	7	0.228692	0.907164	15.5591	15.603	13.5884	16.4826	15.6074	15.3819
Q96CS3;B4E2M8	FAS-associated factor 2	FAF2	52.623	2	0.403123	0.900451	16.0891	12.5153	12.6097	15.3626	14.3228	14.23
A0A024RAJ6;P07686;H0YA83;H0Y9B6;Q5URX0	Beta-hexosaminidase;Beta-hexosaminidase subunit beta;Beta-hexosaminidase subunit beta chain B;Beta-hexosaminidase subunit beta chain A	HEXB	63.111	2	0.139481	0.88787	12.1536	12.5153	12.6097	13.1267	12.6409	14.1746
F5H6X6;B4DSM6;A0A024R592;V9HWJ0;B4DJ30;Q14697;Q14697-2;B4DIW2;E9PKU7;B4DZ53	Neutral alpha-glucosidase AB	GANAB;HEL-S-164nA	96.215	11	0.298419	0.887524	17.8387	15.1043	15.3079	17.392	16.7794	16.742
Q0QF37;Q75MT9;Q6FHZ0;A0A024R4K3;P40926;P40926-2;G3XAL0;B3KTM1	Malate dehydrogenase;Malate dehydrogenase, mitochondrial	MDH2	31.969	9	0.425443	0.885055	19.062	16.9223	14.6457	17.9256	17.7863	17.5732
A0A140VJZ4;P15374;A0A087WTB8;Q5TBK7	Ubiquitin carboxyl-terminal hydrolase isozyme L3;Ubiquitin carboxyl-terminal hydrolase	UCHL3	26.182	5	0.296009	0.866401	16.1976	14.0327	16.3893	17.1778	16.3483	15.6928
Q53H22;A8K4H7;Q06203;D6RE15;D6RCC8;Q59G63	Amidophosphoribosyltransferase	PPAT	57.384	2	0.0691348	0.864848	14.3512	14.4255	14.5364	15.1398	15.2809	15.4869
A0A090N8G0;P41250	Glycine--tRNA ligase	GARS	77.53	5	0.116266	0.860072	15.165	14.2445	15.0492	16.1144	15.4854	15.4392
C9J9K3;A0A024R2P0;A0A0C4DG17;P08865;Q96RS2;F8WD59;A0A024R7P5	40S ribosomal protein SA	RPSA;LOC388524	29.404	6	0.243523	0.855149	20.7338	21.9875	19.8398	21.2228	22.4054	21.4984
A0A024R0Q4;Q8IV08;M0R3G9	Phospholipase D3	PLD3	54.705	2	0.132933	0.854795	16.2131	14.7957	15.4686	16.444	16.3348	16.2631
V9HWB4;P11021	78 kDa glucose-regulated protein	HEL-S-89n;HSPA5	72.332	19	0.171885	0.852063	20.1761	19.0056	18.3913	20.1103	19.9577	20.0611
Q9Y3F4;Q9Y3F4-2;B0AZV0	Serine-threonine kinase receptor-associated protein	STRAP	38.438	5	0.187433	0.851585	15.9109	14.8141	16.4474	16.8657	15.973	16.8885
Q53HG5;A8K4K9;Q15006;H0YAS9	ER membrane protein complex subunit 2	EMC2	34.761	3	0.299167	0.851361	16.918	14.5289	14.2082	16.1771	16.0647	15.9673
Q9UES0;A4D2J0;O15498-2;O15498;B5BU81	Synaptobrevin homolog YKT6	YKT6	21.606	2	0.214559	0.84541	13.8863	15.8985	14.2391	15.4556	15.3585	15.746
A0A024R652;P11586;F5H2F4;B7Z809	C-1-tetrahydrofolate synthase, cytoplasmic;Methylenetetrahydrofolate dehydrogenase;Methenyltetrahydrofolate cyclohydrolase;Formyltetrahydrofolate synthetase;C-1-tetrahydrofolate synthase, cytoplasmic, N-terminally processed	MTHFD1	101.53	13	0.150561	0.843659	17.087	16.7707	17.3521	18.0058	17.1419	18.5931
A0A024R6I3;Q53GF9;P49755;G3V2K7;B4DL12	Transmembrane emp24 domain-containing protein 10	TMED10	24.976	5	0.594414	0.836882	18.0003	17.7427	12.6097	17.7206	17.7009	15.4419
B3KX11;P49368;B4DUR8;Q59H77;P49368-2;Q2TU64	T-complex protein 1 subunit gamma	CCT3	57.945	16	0.141383	0.831137	18.0563	18.6981	19.3501	19.6786	19.1965	19.7227
Q59EZ3;P11717	Cation-independent mannose-6-phosphate receptor	IGF2R	266.11	17	0.219646	0.826857	15.4462	15.3926	13.7699	16.2295	15.6181	15.2417
A0A087X0U3;Q8N169;A0A024R050;P43003-2;P43003;E7EUS7;E7EUV6;M0QY32;M0R106;Q59GB0;B4DHC6;M0R063;B4DF14;A0A087WT87;P48664-2;P48664	Amino acid transporter;Excitatory amino acid transporter 1;Excitatory amino acid transporter 4	SLC1A3;SLC1A6	47.099	2	0.234737	0.821024	14.0491	15.6167	15.6784	15.3629	15.8033	16.641
I6TRR8			109.15	5	0.100588	0.81497	14.168	14.6529	14.8956	15.4898	15.211	15.4606
Q2VIR3;P41091;F8W810;Q2VIR3-2	Putative eukaryotic translation initiation factor 2 subunit 3-like protein;Eukaryotic translation initiation factor 2 subunit 3	EIF2S3L;EIF2S3	51.228	3	0.243722	0.810856	14.7785	14.6127	15.9489	16.7745	15.9872	15.011
A0A0C4DGS1;A0A024RAD5;P39656-2;P39656;U3KQ84;P39656-3	Dolichyl-diphosphooligosaccharide--protein glycosyltransferase 48 kDa subunit	DDOST	48.799	4	0.447384	0.810136	18.036	15.2969	14.1611	15.8141	17.1267	16.9836
E7ES96;Q53FV8;A0A0S2Z4D2;A0A024R6A3;P49768-2;P49768;E5RFW4;B7Z8T5;E5RG63;B4DVM3;B1AP22;P49768-3;P49768-5;P49768-6;P49768-7;P49810-3;P49810	Presenilin;Presenilin-1;Presenilin-1 NTF subunit;Presenilin-1 CTF subunit;Presenilin-1 CTF12;Presenilin-2;Presenilin-2 NTF subunit;Presenilin-2 CTF subunit	PSEN1;PSEN2	42.082	2	0.38212	0.807814	15.2369	13.8713	12.6097	15.9011	13.5465	14.6938
B2R841;P53350;I3L387;Q58A51;D3DWF3;B4E083;Q59GD0	Serine/threonine-protein kinase PLK;Serine/threonine-protein kinase PLK1	PLK1;Plk-1 delta	68.264	2	0.256997	0.800467	12.1536	12.5153	14.1386	13.7627	13.2028	14.2433
B4DJ63;B4DW25;B4DP88;B4E1G2;Q5BJF5;Q5HYG8;A0A024RB99;V9HW06;Q53ET4;B4DWA7;P34897-3;P34897;G3V5L0;G3V2Y4;B4DLV4;B4DJQ3;P34897-2;H0YIZ0	Serine hydroxymethyltransferase;Serine hydroxymethyltransferase, mitochondrial	SHMT2;DKFZp686P09201;HEL-S-51e	41.656	4	0.507949	0.792745	17.4522	14.8723	12.6097	16.0229	15.7966	15.4929
G3V4F7;B4DDS7;P61011-2;P61011	Signal recognition particle 54 kDa protein	SRP54	48.67	2	0.486383	0.7911	11.9256	12.5153	12.6097	13.6308	10.6754	15.1176
B4DPV8;Q8NC54	Keratinocyte-associated transmembrane protein 2	KCT2	19.261	2	0.247292	0.790852	16.5671	16.3987	15.1569	17.0477	17.507	15.9405
Q9HC39;Q9HBB9;I3L2C7;Q8WUM5;P57678	Gem-associated protein 4	GEMIN4	118.79	3	0.155485	0.790167	12.1536	12.5153	12.6097	12.5118	13.7865	13.3509
B4DP80;Q8NCW5-2;Q8NCW5	NAD(P)H-hydrate epimerase	APOA1BP	33.627	3	0.358545	0.784626	12.1536	14.3204	12.6097	14.6135	12.5536	14.2706
Q549C5;Q9NS69;Q53GB0	Mitochondrial import receptor subunit TOM22 homolog	MST065;TOMM22	15.521	3	0.609962	0.772331	16.9203	12.5153	12.6097	16.7573	12.8598	14.7452
Q5QTQ6;B4DJS7;A8K885;A0A0A0MRI2;Q9UNH7-2;Q9UNH7	Sorting nexin-6;Sorting nexin-6, N-terminally processed	SNX6	24.652	2	0.319863	0.771871	12.1536	14.5231	14.3763	14.3355	14.8815	14.1516
F8VYY9;A0A024R125;P54619-2;P54619;P54619-3;H0YHF8;F8VPF5;F8VVA3;B7Z6X8;E9PGP6;A0A090N8Q6;Q9UGJ0-2;Q9UGJ0-3;Q9UGJ0	5-AMP-activated protein kinase subunit gamma-1;5-AMP-activated protein kinase subunit gamma-2	PRKAG1;PRKAG2	31.905	2	0.485621	0.768561	12.1536	15.7446	15.3454	14.2104	15.1163	16.2227
Q9Y230;B3KNL2;Q9Y230-2;M0R0Y3;B4DW30	RuvB-like 2	RUVBL2	51.156	13	0.224945	0.766482	17.8082	17.3664	18.9104	18.7082	18.3039	19.3724
A0A024R2Z6;Q9BVP2-2;Q9BVP2	Guanine nucleotide-binding protein-like 3	GNL3	60.572	3	0.127721	0.758111	14.3566	13.9159	14.308	15.1425	15.1886	14.5238
A0A024R972;P11047	Laminin subunit gamma-1	LAMC1	174.01	15	0.51181	0.756637	14.5062	14.6757	17.4794	16.7741	14.4948	17.6622
Q53YD7;P26641;P26641-2	Elongation factor 1-gamma	EEF1G	50.118	9	0.11796	0.748384	18.9009	18.8563	19.2326	19.7369	19.486	20.0121
Q7RU04;Q9H4A4;C9JMZ3;A6NKB8	Aminopeptidase B	RNPEP	73.497	3	0.281941	0.743998	12.1536	12.1724	12.5597	14.0232	11.812	13.2825
B4E054;A0A024R7X3;B3KUZ7;A0A024R7U9;Q9UI12-2;Q9UI12;G3V126;Q8TF11	V-type proton ATPase subunit H	ATP6V1H	52.711	3	0.512681	0.743819	15.2507	15.9254	11.6704	14.9346	15.2636	14.8799
B4DT77;B4DWU2;B4DHY4;Q53HM8;B2R657;P20073-2;P20073;B2R7L2	Annexin;Annexin A7	ANXA7	37.805	9	0.12293	0.743032	19.0136	19.6529	19.1776	19.9642	19.9322	20.1767
B7Z9L0;A8K3C3;P50991;B7Z2Z8;P50991-2;B7Z2F4	T-complex protein 1 subunit delta	CCT4	52.33	16	0.117116	0.742716	18.7324	18.9126	19.1622	19.8934	19.4643	19.6777
Q96HE7	ERO1-like protein alpha	ERO1L	54.392	3	0.527118	0.730345	16.3473	15.1133	11.8963	15.7018	14.9993	14.8468
Q8N5A0;A0A087WUT6;O60841;B3KM86;D3DVI5	Eukaryotic translation initiation factor 5B	EIF5B	138.8	2	0.160216	0.728524	12.1536	12.5153	12.6097	12.8546	13.7388	12.8708
O00231;O00231-2;B4DTS5;J3QRY4	26S proteasome non-ATPase regulatory subunit 11	PSMD11	47.463	5	0.21467	0.722633	15.311	16.0961	16.1928	15.9657	16.5401	17.262
Q5TB53;Q96JZ5;A0A024QYS2;Q9HD45;Q8WUB5	Transmembrane 9 superfamily member 3	TM9SF3;SMBP	29.881	2	0.558639	0.711971	15.8084	16.4247	12.6097	16.0463	16.8493	14.0831
B3KQT9;V9HVY3;P30101;B3KQT2;B4DJ98;B4DDM1	Protein disulfide-isomerase;Protein disulfide-isomerase A3	HEL-S-269;PDIA3	54.102	15	0.345869	0.711479	19.9664	18.9542	17.357	19.6836	19.4911	19.2374
B4DY26;Q5T7S2;P36897-3;P36897;P36897-2;F8W1R9;B4DXN7	Receptor protein serine/threonine kinase;TGF-beta receptor type-1	TGFBR1	48.875	3	0.303792	0.70904	12.1536	12.5153	13.8323	13.9851	12.6919	13.9513
O43175;V9HW79;Q5SZU1;B3KSC3;Q9UMY2;Q8N5M8	D-3-phosphoglycerate dehydrogenase	PHGDH;HEL-S-113;PGDH3	56.65	15	0.178475	0.708613	20.5869	19.69	19.5208	20.8527	20.5758	20.4951
B7Z9U2;B4DH19;B4DGR3;B4DSK5;I3L0N3;B7Z5J7;P46459-2;P46459;Q96D47;D3DXJ4	Vesicle-fusing ATPase	NSF	72.228	6	0.356697	0.70796	14.011	16.1194	13.8097	14.8711	15.8594	15.3335
Q5QPE4;Q9Y5X3;Q5QPE5;B7Z476;Q53FH8;Q6P5V6	Sorting nexin-5	SNX5	26.596	3	0.222968	0.695143	13.8877	14.2994	14.7693	15.1112	14.3324	15.5982
D3DUL8;Q6P9B6;B4DTA9;A8K5C2	TLD domain-containing protein 1	KIAA1609;TLDC1	51.032	3	0.61712	0.694504	12.9792	14.1388	16.8063	13.7481	14.4968	17.7629
Q53G15;B7Z6D5;B3GQE6;Q96GQ7	Probable ATP-dependent RNA helicase DDX27	DDX27	47.168	2	0.257976	0.685026	12.1536	12.5153	12.6097	12.2239	13.9539	13.1558
B2RDD7;O14744-2;O14744;G3V5L5;G3V580;G3V2L6;H0YJX6;B4DV00;O14744-4;O14744-3;O14744-5	Protein arginine N-methyltransferase 5;Protein arginine N-methyltransferase 5;Protein arginine N-methyltransferase 5, N-terminally processed	PRMT5	72.709	2	0.271237	0.683876	13.8315	13.9928	15.4799	15.1235	15.395	14.8373
A8K7F6;P60842;A8K088;J3KT12;P60842-2;B4DNH2;J3KTB5;J3QS69;Q59F68;J3QR64;J3QL43;J3KSZ0	Eukaryotic initiation factor 4A-I	EIF4A1	46.121	14	0.163782	0.682185	19.8065	20.0957	20.6716	20.8424	20.8696	20.9083
C9JJV6;C9JZL8;C9J5M0;C9JC07;B4DG42;A0A024R4N0;Q96S97	Myeloid-associated differentiation marker	MYADM;hCG_1640809	15.864	2	0.183128	0.679537	18.5059	18.5208	18.2461	18.5822	19.1042	19.625
A0A024R5B2;E7ETY4;A9CP04;A0A140VJP1;A8K2S4;E9PC69;Q7KZI7-10;Q7KZI7-13;Q7KZI7-7;Q7KZI7-2;Q7KZI7-15;Q7KZI7-5;Q7KZI7-16;Q7KZI7-4;Q7KZI7-9;Q7KZI7-12;Q7KZI7-14;Q7KZI7-3;Q7KZI7-6;Q7KZI7-11;Q7KZI7-8;Q7KZI7;F5H4J8;F5H6N2;F5H4F6;A0A024R555	Serine/threonine-protein kinase MARK2	MARK2;Par1b	77.63	2	0.255816	0.678324	14.9389	13.6783	14.6684	15.2395	14.4866	15.5943
B0YIW5;Q6MZV5;B0YIW6;P48444;P48444-2	Coatomer subunit delta	ARCN1;DKFZp686M09245	57.21	6	0.216133	0.663636	14.1457	14.0322	15.1651	15.0138	14.9632	15.3568
Q56VW8;A0A140VJT0;P63151;P63151-2;E5RIY1;E5RFR9;Q59GC6;Q6ZP32;Q9Y2T4-3;Q9Y2T4-4;Q9Y2T4-2;Q9Y2T4	Serine/threonine-protein phosphatase 2A 55 kDa regulatory subunit B;Serine/threonine-protein phosphatase 2A 55 kDa regulatory subunit B alpha isoform;Serine/threonine-protein phosphatase 2A 55 kDa regulatory subunit B gamma isoform	PPP2R2A;PPP2R2C	51.647	2	0.44628	0.66064	14.2812	15.5256	12.6097	14.7279	15.5767	14.0939
B4DN87;A8K259;A0A024R5K8;P50454;E9PKH2;Q9NPA9;E9PR70;E9PPV6	Serpin H1	SERPINH1;ra-a47	44.204	4	0.294569	0.654946	16.9759	16.6689	15.1991	16.7828	16.8815	17.1446
Q53SS8;Q15365	Poly(rC)-binding protein 1	PCBP1	37.497	2	0.348643	0.643382	15.3279	17.3474	16.623	16.4592	17.4355	17.3337
C9JJ34;C9JDM3;B7Z6U1;A0A140VK94;B4DE76;F6WQW2;P43487-2;P43487;C9JIC6;C9JXG8;D3DX26;C9JGV6	Ran-specific GTPase-activating protein	RANBP1	18.762	3	0.254708	0.643199	17.8903	17.4778	18.8546	19.0695	18.4916	18.5912
B4DHX4;A0A0S2Z3X8;P31150;B4DH24	Rab GDP dissociation inhibitor alpha	GDI1	46.908	4	0.549604	0.641635	15.8949	13.4219	12.6097	15.9365	14.5936	13.3215
A0A024R1A3;P22314-2;P22314	Ubiquitin-like modifier-activating enzyme 1	UBE1;UBA1	117.85	17	0.197359	0.637961	17.3176	17.5886	18.1291	18.1686	18.164	18.6167
A0A024R1Y2;A0A024R1T9;Q4LE36;P53396-2;P53396;P53396-3;Q8N9C4	ATP-citrate synthase	ACLY;ACLY variant protein	119.77	16	0.261353	0.632237	16.3595	16.4622	17.4388	17.4733	16.8634	17.8205
Q6IBK3;A8K769;A0A140VK92;O15127;H3BV04;H3BN93;H3BUB6;H3BPL9;B3KU14	Secretory carrier-associated membrane protein 2	SCAMP2	36.535	2	0.375004	0.629116	15.9073	18.1692	16.8581	17.0863	17.9075	17.8282
P35580;P35580-5;P35580-2;P35580-3;P35580-4	Myosin-10	MYH10	229	11	0.302513	0.623518	14.6903	14.0215	14.3206	14.9952	15.8012	14.1066
A0A0A1TSG4;Q08722-2;Q08722-3;Q08722-4;Q08722	Leukocyte surface antigen CD47	CD47	31.871	2	0.282185	0.61845	20.009	19.1258	18.5539	19.8987	19.4711	20.1742
B4DDG7;E7ENJ6;B3KNH5;A0A024R7K8;Q59EK3;Q9BXS5;Q9BXS5-2;K7EJL1;B4DN99;Q53GI5;B3KN68;Q9Y6Q5;Q9Y6Q5-2	AP-1 complex subunit mu-1;AP-1 complex subunit mu-2	AP1M1;AP1M2	40.254	4	0.411126	0.614848	15.0307	17.159	14.8049	16.2256	16.6034	16.0102
Q6IBT3;Q53HV2;Q99832;Q99832-3;B7Z7I4;Q99832-4;B7Z1C9;Q99832-2	T-complex protein 1 subunit eta	CCT7	59.328	15	0.221024	0.614663	18.5239	18.2561	18.15	19.4773	18.7813	18.5154
Q53FW2;P60891;B1ALA9;B2R860;A0A0B4J207;A0A140VK41;P60891-2;P11908;P21108;P11908-2;B7ZB02;B1ALA7;H7C540	Ribose-phosphate pyrophosphokinase 1;Ribose-phosphate pyrophosphokinase 2;Ribose-phosphate pyrophosphokinase 3	PRPS1;PRPS1L1;PRPS2	34.864	4	0.334552	0.606886	15.0871	16.7013	16.5515	16.3307	16.6436	17.1863
Q6IB71;A0A140VK43;P25788-2;P25788	Proteasome subunit alpha type;Proteasome subunit alpha type-3	PSMA3	28.415	4	0.54705	0.606869	14.5022	18.1679	16.2312	17.0493	17.625	16.0477
Q5CAQ5;V9HWP2;P14625;Q59FC6;B4DHT9;B4DU71	Endoplasmin	TRA1;HEL-S-125m;HSP90B1	92.339	14	0.436904	0.598172	19.6726	17.1704	17.5186	18.9254	18.8859	18.3448
A0A024R1S5;O00178;B0QY59;B2RDW9	GTP-binding protein 1	GTPBP1	71.463	2	0.248686	0.594691	12.1536	12.9324	12.6097	13.5239	12.6536	13.3023
Q14204	Cytoplasmic dynein 1 heavy chain 1	DYNC1H1	532.4	29	0.468696	0.593128	13.9229	14.7411	16.1306	15.1644	14.7144	16.6953
F5GXX5;P61803;F5H895;A0A0B4J239;Q53G02	Dolichyl-diphosphooligosaccharide--protein glycosyltransferase subunit DAD1	DAD1	9.5541	3	0.593452	0.58796	19.4888	18.1044	15.1443	17.993	18.1094	18.399
A0A087WVQ6;Q00610-2;Q00610	Clathrin heavy chain;Clathrin heavy chain 1	CLTC	192.06	43	0.1953	0.587307	19.1802	19.5745	19.2957	20.0121	19.7453	20.0549
B3KUZ8;A0A024R6W0;P00505;P00505-2;A8K482	Aspartate aminotransferase;Aspartate aminotransferase, mitochondrial	GOT2	41.326	5	0.657549	0.586643	17.7555	16.3056	12.6097	16.2232	16.8423	15.3653
B4E028;C9JG41;B4DIB1;A0A024R466;Q9NQX7-2;Q9NQX7-3;Q9NQX7	Integral membrane protein 2C;CT-BRI3	ITM2C	15.035	2	0.323829	0.580827	15.6485	15.7122	15.983	17.3016	15.643	16.1415
Q5HY57;P50402	Emerin	EMD	24.938	3	0.675614	0.577166	16.9106	13.325	12.4434	15.93	15.5744	12.9061
P18085;C9JPM4;C9JAK5	ADP-ribosylation factor 4	ARF4	20.511	3	0.278788	0.576677	18.399	18.2426	19.0962	18.7531	19.0069	19.7079
J3KQ32;Q9NTK5;Q53SQ6;Q9NTK5-2	Obg-like ATPase 1	OLA1;PTD004	46.937	3	0.465814	0.572525	13.7929	13.774	14.6904	14.3333	13.5103	16.1313
A1JUI8;B4DPJ8;Q59ET3;B2R9K8;A0A024RDL1;P40227;P40227-2	T-complex protein 1 subunit zeta	CCT6A	53.68	11	0.210859	0.570484	18.8072	19.0181	19.1953	19.7457	19.3269	19.6595
Q8TDN6;Q9NUW4;B4E0B8;A0JLQ5	Ribosome biogenesis protein BRX1 homolog	BRIX1;BXDC2	41.401	2	0.40121	0.56852	12.1536	12.5153	12.6097	14.1483	11.9181	12.9178
P13639;Q8TA90;B4DPU3;Q6PK56	Elongation factor 2	EEF2	95.337	26	0.271085	0.561514	19.8263	19.6565	20.5186	20.5423	20.2036	20.9401
A0A024R9E2;A0A087WTT1;E7ERJ7;B4DQX0;B3KT93;A0A024R9C1;P11940-2;P11940;E7EQV3;B4DZW4;E5RH24;E5RJB9;H0YAP2;H0YBN4;H0YAR2	Polyadenylate-binding protein;Polyadenylate-binding protein 1	PABPC1	47.334	6	0.213196	0.560147	16.3846	16.7583	16.5728	17.3042	17.1313	16.9606
H7C3A1;Q9BXP5-5;Q9BXP5-4;Q9BXP5-2;Q9BXP5-3;Q9BXP5;Q7Z4Y3	Serrate RNA effector molecule homolog	SRRT	56.733	3	0.713458	0.559868	12.1536	10.8375	14.9026	12.392	15.9594	11.2219
A8K048;V9HW29;D3DRX6;M1V490;M1VRN1;M1VPF9;M1VKJ2;M1VE91;C1PHA2;P33176;M1V481;M1VPF7;M1VRN0;M1VKI9;M1VE89	Kinesin-like protein;Kinesin-1 heavy chain	HEL-S-61;KIF5B;KIF5B-RET(NM_020630)_K22;R12;KIF5B-RET(NM_020630)_K23;R12;KIF5B-RET(NM_020975)_K22;R12;KIF5B-RET(NM_020975)_K23;R12;KIF5B-RET(NM_020630)_K24;R11;KIF5B-ALK;KIF5B-ALK_K17;A20;KIF5B-RET(NM_020630)_K15;R12;KIF5B-RET(NM_020975)_K15;R12;KIF5B-RET(NM_020630)_K16;R12;KIF5B-RET(NM_020975)_K16;R12	100.84	6	0.6064	0.555921	16.0841	13.9806	12.6481	15.6945	15.4085	13.2776
A8K9T9;A8K8N7;O15067;B4DJ26	Phosphoribosylformylglycinamidine synthase	PFAS	144.64	3	0.303343	0.55563	13.5427	12.8467	13.7834	13.6353	14.5363	13.6681
O75225;B3KW79;A0A024RA40;Q9H3G5;Q9NZ90	Probable serine carboxypeptidase CPVL	CPVL	34.143	3	0.620215	0.554905	17.0271	14.4697	12.6097	15.6709	15.4175	14.6829
Q8TDR3;Q8NEH0;Q8IYV2;Q9UHI6	Probable ATP-dependent RNA helicase DDX20	DDX20	92.219	2	0.451385	0.552152	12.1536	12.5153	12.6097	14.4563	12.2403	12.2385
B4DNL5;A0A024R8S5;P07237;B4DLN6;B4DUA5;H7BZ94;I3L398;H0Y3Z3	Protein disulfide-isomerase	P4HB	55.381	10	0.469956	0.543404	18.7133	17.3546	16.2759	18.412	18.2412	17.3209
B7ZAF0;Q5JP53;Q5SU16;P07437;Q6LC01;B4DY90;Q5ST81;Q9BUU9;B4E052;B4DQN9;B7ZAK1;Q96B85;B4DXZ5;B4DMU8;Q1KSF8;B4DMJ5	Tubulin beta chain	TUBB;XTP3TPATP1	46.566	4	0.423565	0.538147	20.1992	21.6286	21.7579	21.0354	21.6666	22.4981
Q9NNW5;Q8NDH0;E9PDU5;B4E256;A0A087X295;E9PBK6;B4DLP3	WD repeat-containing protein 6	WDR6;DKFZp434F1720	121.72	9	0.285412	0.524357	15.6938	15.5147	16.0517	16.5088	16.549	15.7754
Q9P2X2;Q53F03;B2R7N6;P43007;B7Z9M1;B7Z561	Amino acid transporter;Neutral amino acid transporter A	SLC1A4	55.67	2	0.583549	0.523727	14.6777	12.2088	12.6008	14.1119	14.7527	12.194
A0A024R0A8;O43865;Q6ZMM9;Q2NKW8;V5YQL4;O43865-2;H0Y8B3;Q6ZNS6;Q96HN2-4;Q96HN2-3;Q96HN2-2;Q96HN2	Adenosylhomocysteinase;Putative adenosylhomocysteinase 2;Putative adenosylhomocysteinase 3	AHCYL1;FGFR2-AHCYL1;AHCYL2	58.951	6	0.434415	0.519984	16.193	14.7552	16.3039	16.8195	16.5198	15.4727
B3GQS7;A0A024R3X4;P10809;B7Z5E7;B7Z597;B7Z4F6	60 kDa heat shock protein, mitochondrial	HSPD1	60.68	13	0.584095	0.519109	20.0433	17.827	16.5993	19.3825	18.5413	18.1031
Q92542-2;Q92542;H0Y6T7;B4DJN0;B4DR82;Q5T205;H0Y3Z4	Nicastrin	NCSTN	76.743	4	0.46504	0.513231	17.5706	16.2477	16.1551	16.6934	16.5741	18.2457
B2RBR9;Q14974;B7Z5M1;J3KTM9;Q14974-2;B7Z752	Importin subunit beta-1	KPNB1	97.183	14	0.25348	0.512859	17.6857	17.7657	17.6464	18.4663	18.246	17.9241
O14654	Insulin receptor substrate 4	IRS4	133.77	13	0.280086	0.512513	17.3756	16.9477	17.1455	18.0928	17.3506	17.5629
B4DEX8;A0A140VJP5;P31153-2;P31153	S-adenosylmethionine synthase;S-adenosylmethionine synthase isoform type-2	MAT2A	39.71	2	0.261336	0.510541	15.8634	16.0905	15.9011	16.5933	16.6704	16.123
K9JA46;P07900;P07900-2;Q2VPJ6;Q8TBA7;Q86U12;O75322;Q96HX7	Heat shock protein HSP 90-alpha	EL52;HSP90AA1	84.659	30	0.320194	0.50671	22.1431	22.0085	22.6605	22.7851	23.2675	22.2796
E9PSI1;B7Z6C9;E9PJC4;E9PQY7;E9PS99;E9PL78;E9PJM1;E9PMQ9;A8K7U5;O15321-2;O15321	Transmembrane 9 superfamily member 1	TM9SF1	92.386	3	0.515966	0.496594	15.205	14.3675	12.6097	14.7329	14.8793	14.0598
P17987;E7EQR6;F5H282;E7ERF2	T-complex protein 1 subunit alpha	TCP1	60.343	13	0.274133	0.489379	18.7079	18.4078	18.92	19.2629	19.0419	19.199
Q53HC2;P30048-2;P30048	Thioredoxin-dependent peroxide reductase, mitochondrial	PRDX3	27.624	2	0.509099	0.488805	14.9203	14.8593	12.6097	14.7775	14.403	14.6753
B7Z2B2;E7ERQ4;B7Z2P8;Q8NHS3	Major facilitator superfamily domain-containing protein 8	MFSD8	20.551	2	0.70122	0.48472	17.002	16.779	12.6097	16.946	15.5354	15.3636
A0A024RD80;P08238;B4DMA2;B4DGL0;Q6PK50	Heat shock protein HSP 90-beta	HSP90AB1	83.263	17	0.354255	0.483473	21.3038	21.4145	22.047	22.1652	22.5394	21.5111
B4DDE5;Q9Y289;Q659F8;Q8NC18	Sodium-dependent multivitamin transporter	SLC5A6;DKFZp434F152	45.855	3	0.43422	0.483014	17.3779	16.1926	17.1294	17.2875	16.679	18.1825
B4DF70;V9HW12;P32119;A6NIW5	Peroxiredoxin-2	HEL-S-2a;PRDX2	20.107	3	0.439344	0.481055	18.3907	17.5132	17.4297	19.0136	18.4102	17.353
Q96L92-3;Q96L92;A0A0C4DFU6;Q96L92-2	Sorting nexin-27	SNX27	59.81	3	0.435727	0.473977	15.4645	14.6997	14.0715	15.5601	14.4701	15.6274
H3BQF1;P07741-2;P07741;Q12898;H3BSW3;H3BQZ9;H3BQB1	Adenine phosphoribosyltransferase	APRT	16.323	3	0.327296	0.473494	17.8387	17.9878	17.6882	17.785	18.7023	18.448
C9JIG9;A0A024R2M7;O95747	Serine/threonine-protein kinase OSR1	OXSR1	51.856	2	0.550026	0.471929	13.07	15.1422	15.2488	14.0836	15.1512	15.6421
P50443	Sulfate transporter	SLC26A2	81.661	2	0.398184	0.471243	13.9933	14.2266	14.1537	14.1009	14.1903	15.4961
A0A087WYC1;Q59GF8;P34932;V9HW33;B4DH02;O14992;A0A087WTS8;B4DUS3;B4DIZ3;B4E354;B4DT47;B4E0H6	Heat shock 70 kDa protein 4	HSPA4;HEL-S-5a;HS24/p52	78.605	13	0.342528	0.467196	17.0483	16.6581	16.4985	17.6573	17.2099	16.7393
B7ZM24;Q53ZR1;P55011-3;P55011;G3XAL9	Solute carrier family 12 member 2	SLC12A2	129.72	8	0.592371	0.460236	17.263	16.1421	14.0899	16.6563	15.965	16.2545
A8K8U1;Q86VP6;Q86VP6-2;B3KMG3;A0A0C4DGH5	Cullin-associated NEDD8-dissociated protein 1	CAND1	136.32	7	0.440416	0.454217	14.3889	15.6745	15.5494	15.0667	16.1477	15.7611
C9J1Z8;A4D0Z3;P84085;B4DLJ3	ADP-ribosylation factor 5	ARF5	17.107	2	0.744887	0.453667	12.1536	16.9446	16.1621	14.1409	15.5301	16.9503
B2R7P6;A0A0A0MSW4;P48739;P48739-2;P48739-3;B3KYB6	Phosphatidylinositol transfer protein beta isoform	PITPNB	31.468	3	0.415237	0.447894	14.6838	14.7232	15.257	15.8331	15.6356	14.539
P49588;P49588-2	Alanine--tRNA ligase, cytoplasmic	AARS	106.81	8	0.49522	0.447134	15.9867	14.8904	15.1732	16.3342	14.7106	16.3469
V9HWH7;P31939;B2R7P8;P31939-2	Bifunctional purine biosynthesis protein PURH;Phosphoribosylaminoimidazolecarboxamide formyltransferase;IMP cyclohydrolase	HEL-S-70p;ATIC	64.615	11	0.337142	0.445908	17.2557	17.5521	17.6346	17.8834	17.5907	18.3061
A0A024R0H7;Q9BQA1;B4DJP0;H0Y711;Q9BQA1-2	Methylosome protein 50	WDR77	36.724	2	0.335081	0.444111	15.4283	15.6322	16.0771	16.0008	16.0795	16.3897
A0A024RB85;Q9UQ80;A8K6Y1;Q6PIN5;Q9UQ80-2;Q05D08;F8VR77	Proliferation-associated protein 2G4	PA2G4	43.786	6	0.494669	0.442228	16.4845	15.4153	16.3356	17.5383	16.2317	15.7921
B2R858;P26196;Q8IV96	Probable ATP-dependent RNA helicase DDX6	DDX6	53.216	2	0.448613	0.437612	12.1536	12.1446	11.9529	13.126	12.8951	11.5429
Q53G71;V9HW88;P27797;B4DHR1;K7EJB9	Calreticulin	HEL-S-99n;CALR	46.918	4	0.362839	0.433389	16.9261	16.1671	16.1775	16.8269	16.6815	17.0625
Q59G44;H0Y9V7;B4E295;B4E2Q0;P98194-2;P98194-4;P98194;P98194-3;P98194-5;P98194-8;P98194-9;P98194-6;P98194-7;H0Y9S7	Calcium-transporting ATPase;Calcium-transporting ATPase type 2C member 1	ATP2C1	68.685	3	0.634804	0.431203	13.9506	15.9722	12.6097	15.0794	14.6948	14.052
H9ZYJ2;P10599;P10599-2	Thioredoxin	TXN	11.737	4	0.364029	0.429687	19.309	19.3321	18.9813	20.1146	19.3298	19.467
V9HWB8;P14618;A0A024R5Z9;P14618-2;B4DNK4;B4DRT3;H3BTN5;P14618-3;A0A024R609;H3BQ34;Q8WUW7	Pyruvate kinase;Pyruvate kinase PKM	HEL-S-30;PKM;PKM2	57.936	23	0.369892	0.420558	20.2343	20.1807	20.6606	20.7843	20.419	21.134
Q9Y487	V-type proton ATPase 116 kDa subunit a isoform 2	ATP6V0A2	98.081	4	0.5908	0.419923	13.1882	13.2179	12.6097	14.3345	14.1357	11.8055
B4DQY1;B4DDF7;A8K7B7;A8K3H8;P30153;Q8NB89;B4DE69;B3KQV6;A8K8B0;P30154-5;P30154-4;P30154;P30154-2	Serine/threonine-protein phosphatase 2A 65 kDa regulatory subunit A alpha isoform;Serine/threonine-protein phosphatase 2A 65 kDa regulatory subunit A beta isoform	PPP2R1A;PPP2R1B	61.521	6	0.547993	0.412963	15.2669	15.8294	16.6622	15.4311	16.2122	17.3541
Q96L35;Q59F17;Q541P7;P54760;D3DNT9;P54753	Receptor protein-tyrosine kinase;Ephrin type-B receptor 4;Ephrin type-B receptor 3	EPHB4;EPHB3	102.56	3	0.48404	0.40957	12.83	12.5153	12.2358	13.0243	12.0546	13.7307
B4E022;V9HWD9;Q53EM5;P29401;P29401-2;E9PFF2;F8W888;A0A0S2Z5C0;B3KPZ8;A0A0K0K1H9;B4DVU1;A0A0B4J1R6;B3KSI4	Transketolase	HEL107;TKT	62.878	4	0.641781	0.402291	16.6313	16.604	14.0586	16.4281	16.7693	15.3033
A0A024R9I0;P21283;E7EV59;B7Z593	V-type proton ATPase subunit C 1	ATP6V1C1	43.941	2	0.473577	0.397594	13.2436	13.2526	12.6097	13.3629	14.1689	12.767
Q6IPT9;Q6IPS9;Q6IPN6;Q53HR5;Q53HQ7;Q53HM9;A8K9C4;Q5VTE0;P68104;Q53GA1;Q53GE9;Q53G85;Q96RE1;Q8IUB0;B4DV42;A0A087WV01;Q9H2I7;Q53G89;A0A087WVQ9;P68104-2;Q53HR1;B4DNE0;Q9NZS6;Q504Z0;B4E2C5;Q16577;A9X7H1;Q05639	Elongation factor 1-alpha;Putative elongation factor 1-alpha-like 3;Elongation factor 1-alpha 1;Elongation factor 1-alpha 2	EEF1A1;EEF1A1P5;EEF1A1L14;PTI-1;EEF1A2	50.184	12	0.384861	0.396895	22.4399	22.975	22.8591	23.1811	23.4041	22.8794
B0ZBD0;Q8WVX7;P39019;M0R2L9;M0QXK4;M0QYF7;M0R140	40S ribosomal protein S19	RPS19	16.06	3	0.44761	0.394575	18.0143	17.8595	17.7405	18.4633	18.7995	17.5351
V9HVZ4;P04406;Q2TSD0;P04406-2;E7EUT5;Q0QET7;A4UCT1;B4DRV9	Glyceraldehyde-3-phosphate dehydrogenase	HEL-S-162eP;GAPDH	36.053	10	0.380597	0.393762	21.4448	21.0892	21.6155	21.7288	21.5961	22.0058
Q92896;Q92896-3;Q92896-2;H3BM42	Golgi apparatus protein 1	GLG1	134.55	3	0.681357	0.376963	11.1019	10.9363	12.6935	11.7935	10.5244	13.5447
F2XI28;B2ZRD4;W8Y4A2;W0HE66;V6CJI7;U6ER51;U6BZR6;T2B9H9;S5TLC0;S5DU27;S5DN96;S5DLI1;S5DI47;S5DHS8;S5DHS4;R9UR01;R9RIA8;R9RFL1;R4RWV9;Q9GIP0;Q8SNC6;Q5R1M1;Q2UV93;Q0GC70;Q09GE6;N1LK74;M9TIT3;M5ETC5;M4TCH1;M4RMN4;M4RCG9;M4R8V8;M4R8V2;M4R8T6;K8ESP8;K4UNA5;K4ULG4;I7GSS2;I2GUK8;I1U8N1;H8XBU0;H6SSQ4;H2ALZ7;G8FV57;G0WJF3;G0WJF2;F5CR31;F4NC92;E9ABX8;E7BBA4;E1Y6P5;E1CJE3;E0WMT8;E0WMN0;D8MIW0;D5H3W2;D4P942;…	HLA class I histocompatibility antigen, Cw-16 alpha chain;HLA class I histocompatibility antigen, A-30 alpha chain;HLA class I histocompatibility antigen, Cw-12 alpha chain;HLA class I histocompatibility antigen, B-59 alpha chain;HLA class I histocompatibility antigen, B-55 alpha chain;HLA class I histocompatibility antigen, B-54 alpha chain;HLA class I histocompatibility antigen, A-36 alpha chai…	HLA-A;HLA-C;HLA-Cw;HLA;HLA-B;Cw;B*56;HLA-B41;B-3501;HLA-Bw62.4;HLA-Bw62.1;HLA-Bw62.5;HLA-Bw62.3;HLA-B57;HLA-B*1513;HLA-B35;HLA-B*3512;HLAC;HLA-CW	31.623	6	0.553017	0.376406	17.4045	17.6992	18.2229	17.5774	17.6153	19.2631
A0A0S2Z4R1;P54577;A0A0C4DGZ5	Tyrosine--tRNA ligase, cytoplasmic;Tyrosine--tRNA ligase, cytoplasmic, N-terminally processed;Tyrosine--tRNA ligase	YARS	59.143	6	0.406845	0.374668	15.9498	15.8474	16.4245	16.6532	16.2673	16.4253
Q6FH24;B4DWR3;D3DWY7;P61758	Prefoldin subunit 3	VBP1	18.735	2	0.445285	0.37191	14.4623	15.0032	14.4637	15.5044	14.6338	14.9067
Q16643;Q16643-2;Q16643-3;D6RCR4;D6RFI1;D6R9W4;B7Z2Z0;D6R9Q9;B3KSQ7	Drebrin	DBN1	71.428	2	0.529266	0.368504	13.7355	12.5153	13.1155	13.8946	12.7263	13.8508
Q59ER4;B4DN85;Q96J02-3;Q96J02-2;Q96J02	E3 ubiquitin-protein ligase Itchy homolog	ITCH	71.393	6	0.545284	0.367526	15.5785	16.7764	16.0056	15.6386	17.0826	16.7418
A0A024R321;O75369-6;O75369-3;O75369-2;O75369-9;O75369;O75369-8;O75369-5;O75369-4;Q68CT4;E7EN95;O75369-7	Filamin-B	FLNB;DKFZp686A1668	280.49	3	0.626427	0.36734	9.69711	11.8989	9.56117	11.013	10.9983	10.2479
Q0VGA5;Q53HA4;Q5T5C7;P49591	Serine--tRNA ligase, cytoplasmic	SARS	58.406	4	0.514885	0.360464	15.0246	16.2636	16.203	15.7559	16.3424	16.4743
V9HWH6;Q8N7G1;P00491;Q9P1G4;G3V5M2	Purine nucleoside phosphorylase	HEL-S-156an;PNP	32.118	4	0.594842	0.354333	15.5179	17.1568	14.9753	16.2092	16.3731	16.1308
Q6LET3;A0A140VJL3;P00492	Hypoxanthine-guanine phosphoribosyltransferase	HPRT1	24.588	6	0.474319	0.345042	18.2222	17.7407	18.7194	18.3962	18.5335	18.7877
A0A024R222;B4DHQ3;Q9Y617;A0A024R280;Q9Y617-2	Phosphoserine aminotransferase	PSAT1	40.422	7	0.714244	0.340962	18.2991	15.8837	15.7665	18.3068	16.4949	16.1705
Q9Y6M4-3;Q9Y6M4-4;Q9Y6M4;Q9Y6M4-2;K7EP38;A0A0U1RQH9;A0A0U1RQK2;A0A0U1RR14;K7ESB6;B7Z7D1;A0A024R604;U3KQA5;A0A024R5W3;A0A0U1RQT7;Q8IXA3;A0A0U1RQY7;U3KQB3;Q9HCP0-2;P78368;Q9HCP0	Casein kinase I isoform gamma-3;Casein kinase I isoform gamma-1;Casein kinase I isoform gamma-2	CSNK1G3;CSNK1G2;hCG_2004507;CSNK1G1	48.897	2	0.767492	0.339732	12.1536	16.0801	15.4161	13.6966	15.1829	15.7895
P50570-3;P50570-2;P50570-5;P50570-4;P50570;Q59G96	Dynamin-2	DNM2	97.553	6	0.676345	0.336682	13.3774	16.1078	15.2944	14.5813	15.5669	15.6415
A0A0P1J1R0;Q5W0H4;A0A0B4J2C3;P13693;A0A024RDY2;B4DKJ4;J3KPG2;Q9NXW1;P13693-2	Translationally-controlled tumor protein	TPT1	19.595	3	0.575362	0.330035	16.7341	17.0899	16.7038	18.1957	16.566	16.7562
V9HW26;P25705;P25705-2;P25705-3;K7ERX7;K7EK77;B4DGW3	ATP synthase subunit alpha;ATP synthase subunit alpha, mitochondrial	HEL-S-123m;ATP5A1	59.75	9	0.752674	0.319996	19.6448	17.8338	15.5812	18.115	17.8108	18.0939
P55060-3;P55060;B4DM67;B4DUC5;B4DS32;P55060-4;B4DPS6;B4DM31	Exportin-2	CSE1L	107.78	7	0.627488	0.315418	15.1509	14.7584	16.4125	15.6528	15.1326	16.4826
Q8N6N5;Q8IZ29;P68371;Q8IWP6;B3KML9;P04350;Q96HX0;B4DJ43;B4DE77;B4DFH6	Tubulin beta-4B chain;Tubulin beta-4A chain	TUBB2C;TUBB4B;TUBB4A	49.807	19	0.633217	0.309088	21.7682	23.0513	23.2422	22.2712	22.9581	23.7596
Q6I9U3;P20645;H0YGE9;H0YGT2;Q96AH2;F5GX30;B2R6S2;Q53GY9	Cation-dependent mannose-6-phosphate receptor	M6PR	30.975	3	0.592254	0.302651	17.8169	19.3969	18.1821	18.5783	18.8676	18.8579
V9HWH2;V9HW77;P12277;A0A0S2Z471;B4DP56	Creatine kinase B-type	HEL-S-29;HEL-211;CKB	42.644	11	0.510808	0.302521	19.8215	19.9563	20.4511	20.6756	20.1251	20.3359
A0A024R861;O00743-2;O00743;O00743-3;A0A0S2Z482;B7Z3E2	Serine/threonine-protein phosphatase;Serine/threonine-protein phosphatase 6 catalytic subunit;Serine/threonine-protein phosphatase 6 catalytic subunit, N-terminally processed	PPP6C	35.144	2	0.764094	0.299628	12.992	16.1393	15.1123	13.6756	15.8841	15.5828
Q8NE01-2;Q8NE01-3;Q8NE01	Metal transporter CNNM3	CNNM3	70.631	3	0.630371	0.29925	14.3111	13.4825	13.1331	13.7926	13.2051	14.8267
P16152;E9PQ63;A8MTM1;P16152-2	Carbonyl reductase [NADPH] 1	CBR1	30.375	5	0.651307	0.296433	16.2347	14.4475	16.3746	16.3288	15.7213	15.8959
B3KT06;B3KPS3;P68363;A8JZY9;P68363-2;B4DDU2	Tubulin alpha-1B chain	TUBA1B	46.341	18	0.599303	0.294467	21.9894	23.052	23.1226	22.5628	22.8808	23.6038
B4DLC0;Q15366-6;Q15366-3;Q15366;Q15366-2;F8VXH9;B4DRD7;H3BRU6;F8VZX2;Q15366-7;Q15366-8;Q15366-4;Q15366-5;F8W0G4;F8W1G6;J3QT27;Q5MJP6;E9PFP8;P57721-2;P57721-3;P57721-5;P57721-4;P57721	Poly(rC)-binding protein 2;Poly(rC)-binding protein 3	PCBP2;PCBP3	32.165	6	0.493214	0.293529	18.6256	19.0034	18.8466	19.1157	19.2468	18.9937
Q53HU0;P50990-2;P50990;Q7Z759;P50990-3;H7C4C8	T-complex protein 1 subunit theta	CCT8	59.65	13	0.513697	0.288493	18.6587	18.8194	19.2824	19.2814	19.1436	19.2009
Q6PUJ7;Q6FHP5;Q53FV0;A8K401;P35232;C9JZ20;E7ESE2;E9PCW0;C9JW96;P35232-2	Prohibitin	HEL-S-54e;PHB	29.82	5	0.750725	0.286208	19.5213	18.1757	16.0314	18.1557	18.1029	18.3284
Q53Y06;P36543-2;P36543;C9J8H1;P36543-3	V-type proton ATPase subunit E 1	ATP6V1E1	26.145	3	0.540573	0.284556	15.4257	15.9669	15.5181	16.154	16.1031	15.5072
B4DUT7;Q53F90;A0A140VJK6;P49915-2;P49915	GMP synthase [glutamine-hydrolyzing]	GMPS	71.24	2	0.593344	0.284135	13.7489	14.6779	14.9975	14.3849	14.8306	15.0612
Q9UJZ1-2;Q9UJZ1;A0A087WYB4	Stomatin-like protein 2, mitochondrial	STOML2	33.337	3	0.822829	0.283717	17.0499	12.5153	12.6097	14.0553	14.0362	14.9346
I3L397;I3L504;P63241;P63241-2;F8WCJ1;C9J7B5;C9J4W5;Q9GZV4;Q6IS14	Eukaryotic translation initiation factor 5A;Eukaryotic translation initiation factor 5A-1;Eukaryotic translation initiation factor 5A-2;Eukaryotic translation initiation factor 5A-1-like	EIF5A;EIF5A2;EIF5AL1	16.019	2	0.831953	0.280587	15.3094	19.2329	19.468	16.5672	19.2221	19.0628
I3L3P7;B2R4W8;P62244;I3L246;A8K7H3;H3BN98	40S ribosomal protein S15a	RPS15A;hCG_1994130	11.477	4	0.757926	0.278322	17.1649	19.0125	19.235	17.2431	19.8758	19.1284
Q5CZB5;Q02952-3;Q02952-2;Q02952	A-kinase anchor protein 12	DKFZp686M0430;AKAP12	125.08	2	0.715034	0.277059	13.6482	11.2418	12.9062	13.5894	12.7739	12.264
Q15813;Q15813-2	Tubulin-specific chaperone E	TBCE	59.345	2	0.680881	0.267513	12.1536	11.3245	13.3436	12.4928	13.004	12.1276
V9HW96;P78371;F5GWF6;P78371-2;F8VQ14;B7Z4R3	T-complex protein 1 subunit beta	HEL-S-100n;CCT2	57.488	16	0.580969	0.262435	18.3666	18.6826	19.237	19.0141	18.763	19.2965
B5MDF5;P62826;J3KQE5;F5H018;B4DV51	GTP-binding nuclear protein Ran	RAN	26.224	8	0.548883	0.260252	21.2771	21.2863	21.6099	21.4108	21.7113	21.832
E9PP23;E9PHY0;B7Z4Z2;B7Z6L8;P11117;B7Z8T9;B7Z7D2;E9PQY3;B7Z552	Lysosomal acid phosphatase	ACP2	35.156	3	0.566608	0.260041	17.6659	17.8314	17.735	17.5419	18.2096	18.2609
B3KY56;B3KMV5;A0A024RB17;A0A024RB16;Q9BSJ8;Q9BSJ8-2	Extended synaptotagmin-1	FAM62A;ESYT1	117.39	6	0.640115	0.257201	14.9231	15.2716	15.8649	15.1616	15.3235	16.3461
Q6ZTI3;Q15046;H3BRC9;J3KRL2;H3BPV7;Q15046-2	Lysine--tRNA ligase	KARS	48.421	2	0.764682	0.251881	14.0618	11.8394	12.6854	14.0777	11.8202	13.4445
B4E2S7;P13473-2;H0YCG2;B4DF49;B7Z2R9;P13473;P13473-3	Lysosome-associated membrane glycoprotein 2	LAMP2	39.811	3	0.604842	0.250547	17.9826	18.3777	18.5691	18.0782	18.5899	19.0128
C9J0K6;P30626-3;P30626-2;P30626	Sorcin	SRI	17.605	9	0.656017	0.239701	20.7584	22.1224	21.1953	21.9484	21.3793	21.4674
V9HW21;P00918;A0A0K0K1L1	Carbonic anhydrase 2	HEL-76;CA2	29.246	4	0.648194	0.239484	17.7461	17.5525	17.024	18.03	18.0337	16.9774
Q5VSQ6;P13674-3;P13674-2;P13674	Prolyl 4-hydroxylase subunit alpha-1	P4HA1	60.966	2	0.74062	0.232998	14.72	12.5153	12.6097	13.3207	13.6211	13.6022
A2VCR0;B4DM33;Q15691	Microtubule-associated protein RP/EB family member 1	MAPRE1	19.408	2	0.629303	0.232064	16.3894	17.2264	17.1977	17.4739	16.9966	17.0392
P38606-2;P38606;B7Z2V6	V-type proton ATPase catalytic subunit A	ATP6V1A	64.735	7	0.764298	0.231061	17.7742	16.9483	15.4352	17.8352	16.7673	16.2483
Q6P4Q7;Q6P4Q7-2;Q9H8M5-3;Q9H8M5-2;Q9H8M5	Metal transporter CNNM4;Metal transporter CNNM2	CNNM4;CNNM2	86.606	2	0.693891	0.228202	12.1536	12.5153	12.0752	12.5048	11.5948	13.3291
P54709;D3DNF9;C9JA36;P54709-2;C9JXZ1	Sodium/potassium-transporting ATPase subunit beta-3	ATP1B3	31.512	9	0.748976	0.22785	20.4534	20.7452	21.7663	20.6048	20.5816	22.4621
P62495;D6RCB3;B7Z7P8;P62495-2	Eukaryotic peptide chain release factor subunit 1	ETF1	49.03	3	0.611042	0.224173	15.2154	15.1624	15.4267	15.7976	15.5072	15.1721
Q9UF24;Q53FM7;O75489;E9PS48;O75489-2	NADH dehydrogenase [ubiquinone] iron-sulfur protein 3, mitochondrial	DKFZp586K0821;NDUFS3	22.218	2	0.866656	0.214427	16.0496	17.0986	12.6097	15.2351	14.3342	16.8319
F5GZS6;J3KPF3;P08195-3;P08195;P08195-4;P08195-2;B4E2Z3;A0A024R599	4F2 cell-surface antigen heavy chain	SLC3A2	64.872	20	0.644927	0.211251	21.6852	21.0361	21.2613	21.49	21.2692	21.8572
K4DI93;Q13620-3;Q13620-1;Q13620;A6NE76;B2RBV7;A0A0A0MR50;Q13619-2;Q13619	Cullin-4B;Cullin-4A	CUL4B;CUL4A	102.75	3	0.836036	0.202381	10.3796	12.8588	12.2657	10.3423	12.9068	12.8621
V9HWF4;P00558;P00558-2;B4E1H9;B4DHM5;B4DWQ3;B4DHB3	Phosphoglycerate kinase;Phosphoglycerate kinase 1	HEL-S-68p;PGK1	44.614	12	0.721032	0.200261	18.6416	18.0304	19.4977	18.8089	18.5889	19.3726
Q53GG3;B3KN57;B3KML1;O60749;O60749-2	Sorting nexin-2	SNX2	58.444	6	0.701823	0.198472	15.5388	16.5563	16.5183	16.4821	16.7462	15.9805
Q6IAA8;F5GX19;F5H3Y3;H0YFI1;B4DUK2;F5H479	Ragulator complex protein LAMTOR1	LAMTOR1	17.745	4	0.771495	0.195626	16.2465	18.4312	16.6119	17.4012	17.155	17.3203
Q9UQD4;Q6FGM0;Q99961;M0QYE0;M0R0I3;Q99961-3	Endophilin-A2	SH3GL1	39.84	4	0.664039	0.191986	17.5874	17.0437	17.5647	17.5812	17.4133	17.7772
A0A0A0MSI0;Q06830;B2R4P2;A0A0A0MRQ5	Peroxiredoxin-1	PRDX1	18.976	7	0.668586	0.185456	21.4169	21.3057	21.2554	21.8288	21.4466	21.2589
A8K5I0;A0A0G2JIW1;P0DMV9;P0DMV8;B4DNT8;Q59EJ3;P0DMV8-2;B4DFN9;B4DI39;B4DWK5;B4E388;B4DVU9;B4E1S9;V9GZ37;B3KTT5	Heat shock 70 kDa protein 1B;Heat shock 70 kDa protein 1A	HEL-S-103;HSPA1B;HSPA1A	70.051	23	0.678761	0.183705	23.5234	24.2509	23.8481	24.1186	24.028	24.027
Q96HN5;H0YFY6;Q7Z757;A0A024R5G4;Q59HB8;A0A087WY61;A0A024R5M9;Q4LE64;Q14980-4;Q14980-3;Q14980-2;Q14980	Nuclear mitotic apparatus protein 1	NUMA1;NUMA1 variant protein	107.3	2	0.721016	0.18309	12.1536	12.5153	12.6097	12.9573	12.991	11.8796
B3KTJ9;Q8N163-2;Q8N163;E5RHJ4	Cell cycle and apoptosis regulator protein 2	CCAR2	102.93	2	0.703512	0.177978	13.4388	13.3241	12.6097	13.4969	13.0911	13.3186
Q14126	Desmoglein-2	DSG2	122.29	15	0.703168	0.175762	18.4366	18.3503	18.2814	18.3957	18.1587	19.0411
B3KU62;A0A024R9I3;Q597H1;Q53EU7;Q92597-3;Q92597-2;Q92597;E5RG99;E5RJY1;E7ESM1;B7Z5Z7;B7Z4H0;E5RIR1;E5RGM5;E5RIV1;B3KWB2;E5RIM2;B7Z505;Q8N959	Protein NDRG1	NDRG1;TRG14	38.573	2	0.768499	0.17164	17.9945	16.4666	16.6459	17.5585	16.8201	17.2434
D3DWB6;Q93008-1;Q93008;Q59EZ5;Q6P468;O00507;Q86X58;O00507-2	Ubiquitin carboxyl-terminal hydrolase;Probable ubiquitin carboxyl-terminal hydrolase FAF-X;Probable ubiquitin carboxyl-terminal hydrolase FAF-Y	USP9X;USP9Y	271.25	4	0.742832	0.158543	12.1536	12.5153	11.411	12.1554	12.2064	12.1937
P05141;Q6NVC0	ADP/ATP translocase 2;ADP/ATP translocase 2, N-terminally processed	SLC25A5	32.852	8	0.810473	0.157846	20.9153	19.6873	18.7073	19.7341	19.8293	20.22
H7C3T4;V9HW63;Q13162	Peroxiredoxin-4	PRDX4;HEL-S-97n	18.214	3	0.784289	0.156491	19.3193	19.3311	18.0378	18.6313	19.5578	18.9687
Q8TB01;Q6NWZ1;A0A024RBH2;Q07065;B3KVX6	Cytoskeleton-associated protein 4	CKAP4	62.06	10	0.908219	0.155766	17.8129	14.1998	12.6097	15.5778	15.6136	13.8983
Q6NVY0;A0A024R904;Q9HB71;Q9HB71-3	Calcyclin-binding protein	CACYBP	26.182	7	0.770242	0.148238	18.5341	18.4753	18.1444	19.0161	18.7571	17.8253
V9HWG9;B2R983;P78417;Q5TA02;P78417-2;P78417-3	Glutathione S-transferase omega-1	HEL-S-21;GSTO1	27.566	2	0.888032	0.145113	16.3556	13.3057	15.2836	16.47	13.6757	15.2345
Q59FM5;P29992	Guanine nucleotide-binding protein subunit alpha-11	GNA11	41.891	2	0.86835	0.14418	16.9474	16.9733	14.1026	16.1482	15.7745	16.5331
A0A024R845;P61106;X6RFL8	Ras-related protein Rab-14	RAB14	23.897	8	0.835505	0.143045	18.4297	20.7795	19.6086	19.3938	20.0612	19.792
Q5M7Z9;Q53GX7;P26639;P26639-2;B2RDX5;B4DKZ9;B3KTN2	Threonine--tRNA ligase, cytoplasmic	TARS	78.605	8	0.813512	0.133602	15.2376	16.8989	16.3418	16.1233	16.4709	16.2849
X5DNM4;V9HW62;Q04760-2;Q04760	Lactoylglutathione lyase	GLO1;HEL-S-74	20.777	2	0.773153	0.133229	16.058	15.8181	15.9487	16.3087	15.5478	16.3679
B2R9U2;Q02790	Peptidyl-prolyl cis-trans isomerase FKBP4;Peptidyl-prolyl cis-trans isomerase FKBP4, N-terminally processed	FKBP4	51.834	6	0.76601	0.130817	15.6319	15.8864	15.3513	15.9583	15.5048	15.799
H0YH81;Q0QEN7;V9HW31;P06576;F8W079	ATP synthase subunit beta;ATP synthase subunit beta, mitochondrial	ATP5B;HEL-S-271	38.138	13	0.845805	0.128476	20.4824	18.581	18.7698	19.3705	18.9651	19.883
B3KQJ7;Q59ED5;O43657;A0A024RCI0;B4DRB0;B4DUZ1;A0A087WYV6;A0A087WZU5	Tetraspanin;Tetraspanin-6	TSPAN6	27.533	4	0.848454	0.126901	20.0934	19.1412	18.5081	20.1501	18.4934	19.48
E7DVW5;Q01469	Fatty acid-binding protein, epidermal	FABP5	15.164	2	0.872099	0.124871	18.1788	15.9877	16.225	17.6838	16.0588	17.0235
Q04721;Q96JU8	Neurogenic locus notch homolog protein 2;Notch 2 extracellular truncation;Notch 2 intracellular domain	NOTCH2	265.4	9	0.892271	0.123983	16.3961	13.4449	14.3507	15.6073	13.7335	15.2229
Q68CX0;Q9H2J7;Q9H2J7-3	Transporter;Sodium-dependent neutral amino acid transporter B(0)AT2	DKFZp761I0921;SLC6A15	80.823	5	0.824439	0.118048	16.2183	15.8447	16.3927	16.7688	16.5669	15.474
A0A067XG54;Q8NB49-2;Q8NB49-3;Q8NB49-4;Q8NB49	Phospholipid-transporting ATPase;Phospholipid-transporting ATPase IG	ATP11C	127.68	5	0.848792	0.115021	14.6265	15.4796	15.806	14.5664	15.6428	16.048
A8K8A4;Q96FN4;B2RD40;Q96FN4-2	Copine-2	CPNE2	61.217	6	0.875948	0.10911	15.2775	17.3018	17.2276	16.2102	16.7207	17.2033
Q15084-5;Q15084-3;Q15084;Q15084-4;Q15084-2	Protein disulfide-isomerase A6	PDIA6	53.261	6	0.918603	0.105718	17.492	17.1751	19.8038	17.501	17.2642	20.0228
B4DVJ0;B4DE36;A0A0A0MTS2;P06744;P06744-2;K7EQ48;A0A0J9YXP8;A0A0J9YX90;A0A0J9YYH3	Glucose-6-phosphate isomerase	GPI	59.99	8	0.895925	0.102275	18.1127	16.0083	17.2952	18.2718	16.2355	17.2157
A0A024RD93;P22234;E9PBS1;P22234-2;B4DGX3;D6RF62	Multifunctional protein ADE2;Phosphoribosylaminoimidazole-succinocarboxamide synthase;Phosphoribosylaminoimidazole carboxylase	PAICS	47.079	11	0.857512	0.0992175	19.1803	18.14	18.2654	19.3014	18.3932	18.1887
P23526;P23526-2;Q1RMG2	Adenosylhomocysteinase	AHCY	47.716	10	0.844473	0.0935656	19.6504	20.5953	20.349	20.2538	20.0804	20.5411
H7BXG7;A0A024RDH6;A0A024RDD3;D6REX3;O94979-7;O94979-6;O94979-3;O94979-10;O94979-4;O94979-9;O94979-2;O94979;O94979-8;D6RHZ5	Protein transport protein Sec31A	SEC31A;SEC31L1	105.7	3	0.868	0.0932788	13.6881	14.7797	13.6322	14.322	14.5518	13.5061
Q6IAT9;P28072	Proteasome subunit beta type;Proteasome subunit beta type-6	PSMB6	25.357	2	0.920463	0.0889542	18.2591	18.1323	15.9407	18.6082	17.692	16.2987
F2Z2V0;B0QZ18;Q99829;Q5JX56;Q5JX58;Q5JX59;Q5JX60;Q5JX44;E7ENH5;A6PVH9;Q59EI4	Copine-1	CPNE1	58.634	3	0.921255	0.0878264	15.3991	18.4374	17.7283	16.4907	17.4651	17.8725
P31930;B4DUL5	Cytochrome b-c1 complex subunit 1, mitochondrial	UQCRC1	52.645	3	0.946323	0.0844395	17.7955	14.565	13.6765	15.9322	13.7795	16.5787
Q9H3N1;G3V448;B4DZX7	Thioredoxin-related transmembrane protein 1	TMX1;TXNDC	31.791	2	0.899058	0.0800078	18.5751	17.1413	16.5492	17.5091	17.6968	17.2996
O75340;O75340-2;Q53FC3;A0A024QZ42	Programmed cell death protein 6	PDCD6	21.868	9	0.87112	0.0794401	21.5133	22.6916	22.093	22.0762	22.2411	22.2189
A0A024R061;P51809-3;P51809;B4DE96;B4DIH9;B2R6P4;A0A024R074;P51809-2;B4DMB4	Vesicle-associated membrane protein 7	SYBL1;VAMP7	24.935	4	0.868349	0.0789513	18.2946	19.1792	18.7589	18.5677	19.1692	18.7327
B4DPW9;Q53GY0;P13797;A0A0A0MSQ0;P13797-2;P13797-3;Q96HI1	Plastin-3	PLS3	67.599	18	0.900881	0.0754947	18.768	17.2872	18.8373	18.7399	17.8592	18.5199
V9HWE9;P09211;A8MX94;A0A087X2E9	Glutathione S-transferase P	HEL-S-22;GSTP1	23.356	8	0.869607	0.0748917	18.7343	19.3176	19.1046	19.3514	18.7382	19.2915
Q8TBN2;A0A087X0S5;P12109	Collagen alpha-1(VI) chain	COL6A1	47.703	2	0.881208	0.0744935	15.0978	15.2548	14.4214	15.4987	14.6285	14.8703
Q32Q12;P22392-2;Q6FHN3;J3KPD9;P22392;O60361	Nucleoside diphosphate kinase;Nucleoside diphosphate kinase B;Putative nucleoside diphosphate kinase	NME1-NME2;NME2;NME2P1	32.642	6	0.877664	0.0675767	19.852	19.6904	19.8069	20.2062	19.5148	19.8311
F8W9W2;B3KPS5;Q96AD6;P43250-3;P43250;P43250-2;D6RDA3;D6RHC7;D6RHX8	G protein-coupled receptor kinase 6	GRK6	62.192	2	0.89204	0.0637967	13.9356	13.7165	14.1745	14.4776	13.9824	13.558
C9JQR6;B3KP36;Q13308-3;Q13308-4;Q13308-2;Q13308;Q13308-6	Inactive tyrosine-protein kinase 7	PTK7	28.572	2	0.892922	0.0613998	17.4681	16.8015	16.9532	17.4595	16.9428	17.0048
F8VNT9;F8VV56;F8W022;F8VWK8;W6A4U0;A0A024RB05;P08962-3;P08962-2;P08962	Tetraspanin;CD63 antigen	CD63	14.265	2	0.901442	0.0609221	23.4363	22.4678	22.9865	23.3782	22.6519	23.0433
A0A024R0W3;Q96QD8;A8K6H9;Q96QD8-2	Sodium-coupled neutral amino acid transporter 2	SLC38A2	56.025	5	0.918805	0.0605682	18.1204	18.3676	18.962	18.993	19.0737	17.5649
Q5TZX9;A8K6M4;Q9UEU0;B2RE64;Q9UEU0-2	Vesicle transport through interaction with t-SNAREs homolog 1B	VTI1B	26.616	3	0.894448	0.0605473	15.8569	16.265	15.3737	15.9464	15.9032	15.8276
Q05DH1;A0A0K0K1K4;O14818;B0YJ74;O14818-2;Q8TAA3-2;Q8TAA3-5;Q8TAA3;H0Y586;A0A087WYS6	Proteasome subunit alpha type;Proteasome subunit alpha type-7;Proteasome subunit alpha type-7-like	PSMA7;PSMA8	26.713	5	0.919935	0.0561893	16.9529	18.4824	17.6098	17.6836	18.1107	17.4193
B4DYV0;Q96L67;F5H7V1;B4DRI0;Q6UUU9;G3V1R5;B1AKJ5;O43847;O43847-2;H0Y5G9	Nardilysin	NRD1	86.327	2	0.910206	0.0504975	17.6302	17.7306	16.9951	17.4215	17.5066	17.5792
A0A140VK56;P37837;F2Z393	Transaldolase	TALDO1	37.54	4	0.927668	0.0498369	16.5915	15.7911	17.0611	16.996	16.5852	16.012
V9HW22;P11142;E9PKE3;Q53GZ6;Q53HF2;Q96IS6;P11142-2;B3KTV0;E9PN89;E9PNE6;B4E1Q1;B4DTX2	Heat shock cognate 71 kDa protein	HEL-S-72p;HSPA8	70.897	28	0.919226	0.0428379	23.5282	23.8681	23.4956	23.8136	23.6342	23.5727
Q53FT8;A0A140VK45;P20618	Proteasome subunit beta type;Proteasome subunit beta type-1	PSMB1	26.491	4	0.954052	0.0373895	17.3542	18.8189	17.7314	18.4586	18.4915	17.0667
A0A024R5U5;O14672;A0AV88;O14672-2	Disintegrin and metalloproteinase domain-containing protein 10	ADAM10	84.141	2	0.959738	0.0340735	16.8259	15.667	15.3397	16.1118	16.7973	15.0257
Q9P2R3;Q9P2R3-2;Q9P2R3-4;B4DZ21;Q5H9P4;B3KPZ0	Rabankyrin-5	ANKFY1;DKFZp686M19106	128.4	4	0.975542	0.0322959	14.5632	13.2998	17.2877	15.8241	14.5484	14.8751
H7BXY3;A0A024R2T6;Q7L2E3-3;Q7L2E3;Q7L2E3-2;Q6W6M7	Putative ATP-dependent RNA helicase DHX30	DHX30	130.55	2	0.956162	0.0279878	12.1536	12.5153	12.6097	13.17	11.9977	12.1949
O95831-3;O95831;O95831-2	Apoptosis-inducing factor 1, mitochondrial	AIFM1	66.294	7	0.983472	0.0246409	17.1268	13.801	12.6097	15.4276	14.0334	14.1504
V9HW43;P04792;C9J3N8;B4DL87;F8WE04	Heat shock protein beta-1	HEL-S-102;HSPB1	22.782	2	0.97454	0.0240651	14.2664	16.9796	16.0761	15.5427	15.9054	15.9462
Q96F88;Q99575;E5RK39	Ribonucleases P/MRP protein subunit POP1	POP1	114.68	4	0.978629	0.0227466	12.1536	12.5153	12.6097	14.1124	12.3704	10.8641
B7Z4Q5;Q59EV9;B7Z2A4;P18433-4;P18433-2;P18433-3;P18433;B7Z4F4	Receptor-type tyrosine-protein phosphatase;Receptor-type tyrosine-protein phosphatase alpha;Protein-tyrosine-phosphatase	PTPRA	74.556	3	0.974954	0.0226493	13.6478	15.6651	13.6733	13.6365	14.678	14.7397
V9HW41;P61088;F8VZ29;F8VSD4;F8VV71;Q5JXB2	Ubiquitin-conjugating enzyme E2 N;Putative ubiquitin-conjugating enzyme E2 N-like	HEL-S-71;UBE2N;UBE2NL	17.138	5	0.976339	0.0153522	18.6815	18.7873	18.0067	19.0192	17.9068	18.5957
V9HW80;P55072;Q96IF9;Q0IIN5	Transitional endoplasmic reticulum ATPase	HEL-S-70;VCP	89.321	17	0.983869	0.0116264	17.476	19.1357	18.6812	18.2145	18.7158	18.3974
B7Z8X5;A0A024RDE8;Q96HC4-7;Q96HC4-4;Q96HC4;Q96HC4-6;H0Y929;A0A0D9SFR4;H0YBI4;H0Y8Y3;A0A0A0MSP3;Q4W5K9;Q59FC9;B7Z481;Q96HC4-3;Q96HC4-2	PDZ and LIM domain protein 5	PDLIM5;LIM	52.702	2	0.989874	0.00532617	14	13.6754	13.9306	13.8127	13.7798	14.0294
A0A0K0K1J6;B4DRT4;D9IAI1;P30086	Phosphatidylethanolamine-binding protein 1;Hippocampal cholinergic neurostimulating peptide	HEL-S-34;PEBP1	15.964	3	0.994296	0.00444348	18.0306	19.502	18.2575	18.9646	19.0062	17.8326
B4DE30;E7ENZ3;B4DYC8;B7ZAR1;B4DDU6;B4DZT5;B4DXI1;E9PCA1;Q9BU08;V9HW37;P48643-2;P48643;Q96GI1;B4DX08;B4DZY9	T-complex protein 1 subunit epsilon	CCT5;HEL-S-69	51.544	10	0.99567	0.00338343	17.3337	17.2757	17.4065	18.3802	17.3427	16.3032
Q5VW32;F5GXQ0;B7Z953;Q5VW32-2;Q5VW33;B7Z1V1	BRO1 domain-containing protein BROX	BROX	46.476	4	0.998151	0.00252066	18.8584	18.1282	15.3077	18.3499	17.873	16.079
P53794	Sodium/myo-inositol cotransporter	SLC5A3	79.693	3	0.999083	0.000601138	14.3949	15.442	15.3559	15.3946	15.222	14.5779
P78310-7;P78310-2;P78310-6;P78310;A0A024QYU8;P78310-5	Coxsackievirus and adenovirus receptor	CXADR;hCG_1983488	35.569	3	0.998945	-0.000729948	16.3124	16.3072	16.6479	16.3323	15.6724	17.2606
B4DE91;P49189;B4DYY1;B4DX14;B9EKV4;P49189-2	4-trimethylaminobutyraldehyde dehydrogenase	ALDH9A1	52.769	2	0.997944	-0.00135877	15.305	16.54	16.1528	15.5923	16.0547	16.3467
Q96RF0-3;Q96RF0-2;Q96RF0	Sorting nexin-18	SNX18	64.751	2	0.985061	-0.0126942	14.3913	12.5153	14.0392	14.3488	13.5084	13.0504
B4DY23;Q54A51;P35613-2;P35613;A0A087WUV8;B4DNE1;P35613-3;P35613-4;A0A087X2B5;I3L192	Basigin	hEMMPRIN;BSG	28.432	8	0.980673	-0.0135609	24.0646	22.8502	23.1892	23.4763	22.7351	23.8519
B2RAK1;Q9UIQ6-3;Q9UIQ6-2;Q9UIQ6	Leucyl-cystinyl aminopeptidase;Leucyl-cystinyl aminopeptidase, pregnancy serum form	LNPEP	117.34	2	0.973637	-0.0148972	12.8062	12.5153	12.6097	12.4604	12.3441	13.082
A8K2I7;A0A024R7I0;O14908;K7EM11;A0A024R7I1;O14908-2	PDZ domain-containing protein GIPC1	GIPC1	36.039	3	0.99371	-0.0157653	16.9565	16.0823	21.1231	16.5027	15.7011	21.9109
Q01813;Q01813-2	ATP-dependent 6-phosphofructokinase, platelet type	PFKP	85.595	5	0.9764	-0.0168489	15.3359	17.0158	16.2817	15.9302	16.4149	16.2377
Q01650	Large neutral amino acids transporter small subunit 1	SLC7A5	55.01	3	0.961308	-0.0231932	19.5336	19.5312	19.8505	19.2578	19.3778	20.2101
F5H6E2;B7Z3E5;O00159-2;O00159-3;O00159;B7Z9C0	Unconventional myosin-Ic	MYO1C	118.99	16	0.955988	-0.0264946	16.4374	17.1657	17.3483	16.6316	17.1288	17.1116
V9HWC7;P30041	Peroxiredoxin-6	HEL-S-128m;PRDX6	25.035	7	0.951991	-0.0266484	19.1468	19.5545	19.0433	19.4081	19.3393	18.9173
Q9BWS2;S4R3V8;Q86X29-6;Q86X29-5;Q86X29-4;Q86X29;Q86X29-2;Q86X29-3	Lipolysis-stimulated lipoprotein receptor	LSR	64.346	3	0.966658	-0.0356031	15.3117	16.3083	14.1405	14.9351	14.1409	16.5777
B2RB38;Q9Y5Y0	Feline leukemia virus subgroup C receptor-related protein 1	FLVCR1	59.918	3	0.953502	-0.0392955	18.1645	16.5531	15.8874	16.6468	16.8493	16.9911
V9HWB5;Q15181	Inorganic pyrophosphatase	HEL-S-66p;PPA1	32.66	5	0.934905	-0.0401159	16.4113	17.3401	17.2073	16.7542	17.3321	16.7521
A0A140VKC0;Q16222-2;Q16222-3;Q16222	UDP-N-acetylhexosamine pyrophosphorylase;UDP-N-acetylgalactosamine pyrophosphorylase;UDP-N-acetylglucosamine pyrophosphorylase	UAP1	57.028	2	0.952511	-0.0404469	13.5817	11.9734	12.8322	12.2935	13.7785	12.194
A0A0A0MR02;A0A024QZT0;A0A024QZN9;P45880-2;P45880;P45880-1;B4DKM5	Voltage-dependent anion-selective channel protein 2	VDAC2	30.348	7	0.943438	-0.0483133	20.0589	18.6102	20.4001	19.2288	19.2026	20.4929
Q6FI35;Q6FHF5;P12004;B4DUA2	Proliferating cell nuclear antigen	PCNA	28.715	4	0.948178	-0.0510954	17.0292	16.0838	17.2399	17.4292	17.5918	15.1787
E7END7;Q5U0I6;P62820;B7Z8M7;P62820-2;P62820-3	Ras-related protein Rab-1A	RAB1A	19.018	3	0.948633	-0.0522249	16.5336	19.4278	18.4308	17.5899	18.5419	18.1037
E5RIP4;A0A0S2Z5C8;A0A0S2Z5B1;A0A0S2Z5Z7;A0A0S2Z534;Q15043-2;Q15043-3;Q15043;E5RFZ8;E5RGA7;E5RJ40;E5RJG5	Zinc transporter ZIP14	SLC39A14	17	2	0.920696	-0.0533084	17.5604	18.3344	18.3503	17.4781	17.9111	18.6959
Q86Y56;E9PGY2;B3KNN3;B3KPE2;A0A024R803;B3KU91;H0Y650;Q86Y56-3;Q86Y56-2	Dynein assembly factor 5, axonemal	DNAAF5;FLJ20397	93.52	2	0.921305	-0.0565344	12.1536	12.5153	11.4465	11.2706	12.0082	12.6669
B7Z5S9;O94973;O94973-2;A0A0G2JS82;B7Z1Q4;O94973-3;A0A0G2JQM1	AP-2 complex subunit alpha-2	AP2A2	103.06	8	0.906025	-0.0574057	14.9716	16.1114	15.5202	15.3834	15.6167	15.4309
B7ZKQ9;A0A024RBS4;B3KW46;B4DZ71;A0A0S2Z3N2;B4E3I1;Q59FM4;Q8WTV0-4;Q8WTV0-5;Q8WTV0-2;Q8WTV0;A0A0S2Z3I2;F5H4X0;Q8WTV0-3	Scavenger receptor class B member 1	SCARB1	53.847	3	0.89919	-0.0574501	17.1677	16.7575	17.1851	16.7143	16.8309	17.3927
Q5U077;P07195;A8MW50;C9J7H8	L-lactate dehydrogenase;L-lactate dehydrogenase B chain	LDHB	36.638	11	0.896179	-0.0599815	22.8771	22.4978	22.1624	22.7565	22.1581	22.4427
J3QRN6;O94832;J3KRL0;Q7Z3N6;K7EIG7	Unconventional myosin-Id	MYO1D;DKFZp686A01173	111.29	4	0.931096	-0.061047	13.9297	13.2662	13.6503	12.1695	13.9893	14.5043
B7Z641;B7Z2A9;Q53X12;Q93050-1;Q93050;Q93050-3;Q53ET5;Q5CZH6;B7Z2J9	V-type proton ATPase subunit a;V-type proton ATPase 116 kDa subunit a isoform 1	ATP6V0A1;DKFZp686N0561	90.499	11	0.916082	-0.0628042	17.4516	18.8894	17.5127	17.8535	18.4122	17.3995
A0A024RDG6;Q14108;Q14108-2	Lysosome membrane protein 2	SCARB2	54.29	4	0.90427	-0.0690602	17.604	16.2509	16.5182	17.3319	16.4504	16.3835
A0A087X163;B7Z5V3;Q9NP72;Q9NP72-2;Q59EW3;Q5W0J0;B7Z4P9;H0Y6T8	Ras-related protein Rab-18	RAB18	20.42	3	0.929867	-0.0695826	15.3352	18.134	17.398	16.7742	17.2846	16.5996
A0A024R994;O75131;Q05DL8;A0A087WYQ3;E5RHZ0	Copine-3	CPNE3	60.13	17	0.863345	-0.0729154	22.517	22.221	22.1636	22.2122	22.0747	22.3958
A0A140VK65;P21281;B4DFM5;B4DQI9;Q71UA2;B4DWH7;C9JL73;P15313	V-type proton ATPase subunit B, brain isoform;V-type proton ATPase subunit B, kidney isoform	ATP6V1B2;ATP6B1;ATP6V1B1	56.5	6	0.910025	-0.0731948	17.1708	17.0053	15.8064	16.9529	17.164	15.6459
B7Z9S8;A6NGH2;Q6LEU2;A3KLL5;P05026-2;P05026;V9GYR2	Sodium/potassium-transporting ATPase subunit beta-1	ATP1B1	28.627	5	0.871493	-0.075226	19.9756	19.7504	19.9175	19.4738	19.5918	20.3522
A0A1B0GWJ0;A0A1B0GTJ7;X5D8S6;Q71UA4;P30566;X5DP48;X5D2Z4;A0A1B0GTG9;A0A1B0GWF8;B4DP46;A0A0A6YY92;P30566-2;A0A096LNY4;A0A096LNY5;B4DUM2;A0A096LNY6;A8K4X6	Adenylosuccinate lyase	ADSL	54.465	4	0.874369	-0.0803364	16.4537	15.6742	16.171	16.5016	16.1166	15.4398
J3QL14;R4GN72;B2R7M1;F5GYQ1;B7Z6L9;P61421;B7Z788	V-type proton ATPase subunit d 1	ATP6V0D1	26.705	4	0.897246	-0.0825852	19.1843	20.4678	18.4379	18.8871	19.5688	19.3862
B4DVZ8;A0A140VK27;P09960-3;P09960-2;P09960-4;P09960;Q59ES1	Leukotriene A(4) hydrolase;Leukotriene A-4 hydrolase	LTA4H	63.829	4	0.897296	-0.0850392	14.5044	15.5312	13.7319	14.8148	14.9919	13.7057
B7Z4B2;E9PLK3;B7Z899;P55786;P55786-2;B3KU93;B7Z1V9;B7Z1H4;B3KTP2	Puromycin-sensitive aminopeptidase	NPEPPS	92.865	8	0.879532	-0.0857081	15.8064	16.5082	16.8406	15.5367	16.5094	16.852
Q6P6D7;Q6FHU2;Q53G35;P18669;Q6FHK8;Q0D2Q6;B4DKL5;P15259	Phosphoglycerate mutase;Phosphoglycerate mutase 1;Phosphoglycerate mutase 2	PGAM1;PGAM2	28.82	7	0.869054	-0.0874743	19.3926	19.0562	18.9879	19.7443	18.3176	19.1124
J3KTF8;V9HWE8;J3QQX2;P52565;J3KRE2	Rho GDP-dissociation inhibitor 1	ARHGDIA;HEL-S-47e	21.517	2	0.893927	-0.0889035	18.2439	19.3212	17.5823	18.9188	18.5178	17.4441
Q5T0G8;P50995-2;P50995;Q6ICS0;Q59EP1;B7Z6L0;B4DPJ2	Annexin;Annexin A11	ANXA11	54.389	19	0.844332	-0.0898722	22.1429	22.247	22.6068	22.2456	21.8562	22.6252
A8K5D8;A8K4G7;A0A024R2C5;O75351	Vacuolar protein sorting-associated protein 4B	VPS4B	49.23	3	0.903938	-0.0974647	16.4011	17.1551	14.7455	16.3168	16.7231	14.9693
B4E1D9;Q05DL3;D6REM4;V9HW00;P48729-3;P48729;Q6PJ06;E7ETM0;B4DER9;Q8N752;P48729-2	Casein kinase I isoform alpha;Casein kinase I isoform alpha-like	CSNK1A1;HEL-S-77p;CSNK1A1L	26.745	3	0.90129	-0.100921	13.6745	15.8688	15.7687	14.7495	16.039	14.2208
B4DDL1;B4DS96;Q8IY97;A0A140VJE7;B3KXW5;O43747;O43747-2	AP-1 complex subunit gamma-1	AP1G1	39.561	2	0.888956	-0.105822	13.8041	16.0887	15.1124	14.0017	15.6059	15.0801
F8W9S7;A0A024R875;A0A024R862;A0A024R8A2;Q14C86-3;Q14C86-4;Q14C86-5;Q14C86-2;Q14C86;Q14C86-6;B3KMM3;B3KTX2;B0QZ65;A0A0A0MQV8;B4DGD8;B3KN67;H0Y4E7;H0Y7I9;C9IZ08;B4DK42	GTPase-activating protein and VPS9 domain-containing protein 1	GAPVD1	157.46	2	0.817811	-0.106906	12.1536	12.5153	12.6097	11.8346	12.579	12.5444
P07737;K7EJ44;I3L3D5	Profilin-1	PFN1	15.054	6	0.819715	-0.111447	20.755	21.8821	21.6012	21.2622	21.2549	21.3869
A0A024R4T4;P61081	NEDD8-conjugating enzyme Ubc12	UBE2M	20.9	3	0.834601	-0.113781	16.8957	16.3764	17.4467	17.038	16.1226	17.2169
Q99808;Q99808-2	Equilibrative nucleoside transporter 1	SLC29A1	50.219	4	0.843003	-0.114573	20.3101	19.477	18.8151	19.8631	18.8724	19.5229
A0A163HNA3;E7EM57;E7EUI8;Q2VF42;Q2Q9H2;B4DYA7;A8K8D9;P11413;P11413-3;P11413-2;Q0PHS6;E9PD92;Q0PHS1;Q2Q9B7	Glucose-6-phosphate 1-dehydrogenase	G6PD	27.225	3	0.863722	-0.118795	14.0637	15.0869	15.7839	14.8671	13.9789	15.7322
Q9H444	Charged multivesicular body protein 4b	CHMP4B	24.95	2	0.89732	-0.124753	17.7805	18.4733	14.8416	17.0557	16.8529	16.8126
Q53G58;B3KN06;A0A024RBI5;Q59EA2;Q9ULV4;Q9ULV4-2;Q9ULV4-3;F8W1H8;F8VUX3;F8VSA4;F8VRE9;F8VTT6;F8VVB7;B4E3S0;B4DMH3	Coronin;Coronin-1C	CORO1C	53.28	3	0.914327	-0.127472	17.0233	13.6718	14.8617	16.9395	13.4259	14.8089
A0A0S2Z2Z6;P08133;P08133-2;A8K3Q7;B7Z582;Q6ZP35;E7EMC6	Annexin A6;Annexin	ANXA6	75.872	29	0.862987	-0.127884	19.9215	21.2578	21.6632	20.0845	20.3986	21.9757
A8K5J7;A0A024R6M6;Q9UL15;Q9UL15-2	BAG family molecular chaperone regulator 5	BAG5	51.24	4	0.780703	-0.132608	15.7887	14.8319	15.7203	15.3796	15.2949	15.2686
A0A0A0MTB8;Q8NI36	WD repeat-containing protein 36	WDR36	99.365	2	0.776783	-0.134847	12.1536	12.5153	12.6097	12.0336	12.841	11.9995
Q15019;Q15019-3;Q15019-2;B5MCX3;C9IZU3;C9J938;H7C310;C9JB25;C9J2Q4	Septin-2	37500	41.487	7	0.784641	-0.135098	17.2306	17.5332	17.5682	17.0315	16.9174	17.9778
P12931;P12931-2	Proto-oncogene tyrosine-protein kinase Src	SRC	59.834	4	0.832778	-0.13734	16.8361	16.6011	14.885	16.0664	15.6029	16.2408
P25786;P25786-2;B4E0X6;B4DEV8;V9HW55	Proteasome subunit alpha type-1;Proteasome subunit alpha type	PSMA1;HEL-S-275	29.555	3	0.923603	-0.140414	13.9126	16.3341	16.1639	17.5457	16.2498	12.194
B7Z1I2;Q2TU84;A0A140VK69;P17174;P17174-2	Aspartate aminotransferase;Aspartate aminotransferase, cytoplasmic	GIG18;GOT1	41.004	4	0.814397	-0.141497	16.5921	16.6328	15.3827	16.5854	16.2895	15.3082
A0A024RBU0;Q9H9H4;F5H4M0	Vacuolar protein sorting-associated protein 37B	VPS37B	31.307	3	0.832157	-0.151743	14.7338	16.1883	16.7267	14.9735	15.6809	16.5391
Q6FGG2;Q15836;K7ENK9;K7EKX0	Vesicle-associated membrane protein 3	VAMP3;VAMP2	11.309	4	0.779557	-0.152634	20.5539	21.8437	20.742	20.4666	21.1915	21.0235
B7ZLE5;A0A024R462;P02751-12;P02751-4;P02751-10;P02751-6;P02751-5;P02751-9;P02751-14;P02751-13;P02751-8;P02751-17;P02751-3;P02751-11;P02751;P02751-7;P02751-15;Q6MZM7;Q6MZF4;P02751-16	Fibronectin;Anastellin;Ugl-Y1;Ugl-Y2;Ugl-Y3	FN1;DKFZp686O12165;DKFZp686K139	246.7	8	0.826159	-0.153667	13.7522	15.4172	15.7842	15.285	15.0912	14.1165
V9HW72;A8K690;P31948;P31948-2;P31948-3	Stress-induced-phosphoprotein 1	HEL-S-94n;STIP1	62.639	13	0.770481	-0.154925	18.8142	18.708	18.3743	19.2054	18.4355	17.7909
P49411	Elongation factor Tu, mitochondrial	TUFM	49.541	4	0.948822	-0.156355	15.6486	14.5948	21.7278	14.928	15.2067	21.3673
V9HWF5;A8K486;P62937;Q71V99;B2RE56;B4DM82;P62937-2;F8WE65;C9J5S7	Peptidyl-prolyl cis-trans isomerase;Peptidyl-prolyl cis-trans isomerase A;Peptidyl-prolyl cis-trans isomerase A, N-terminally processed	HEL-S-69p;PPIA	18.012	10	0.745381	-0.158994	22.1897	23.2726	22.3453	22.3614	22.4784	22.4908
B7Z4B7;Q5JXI8;B7Z6U8;Q53FI7;Q13642-1;Q13642-5;Q13642-4;Q13642;A0A0D9SFI6;A0A0D9SFB0;Q5JXH9;A0A0D9SFZ9;Q5JXH8;Q5JXH7;Q5JXI3;Q5JXI2;B7Z5T3;B7Z5V0;Q13642-3;A0A0D9SG53;A0A0D9SGB2;Q5JXI0;B7Z9A1	Four and a half LIM domains protein 1	FHL1	28.097	4	0.737464	-0.162337	17.9485	18.5153	18.5751	17.863	17.9904	18.6985
V9HWB9;P00338;P00338-3;B4DJI1;P00338-4;P00338-5;P00338-2;F5GXH2;F5GYU2;F5GXY2	L-lactate dehydrogenase;L-lactate dehydrogenase A chain	HEL-S-133P;LDHA	36.688	10	0.731799	-0.163745	21.73	21.2865	21.2488	21.798	20.9528	21.0233
A0A024R4F1;P06733;E2DRY6;P06733-2	Alpha-enolase;Enolase	ENO1	47.168	16	0.723412	-0.167276	21.2723	22.139	21.9536	21.5014	21.901	21.4606
Q96QK1;Q53FR4;Q5HYM2	Vacuolar protein sorting-associated protein 35	VPS35;DKFZp686O2462	91.706	10	0.744754	-0.172503	16.0367	17.3143	16.9555	16.2114	16.7616	16.816
P05023-4;P05023;P05023-3;B7Z3V1;P05023-2	Sodium/potassium-transporting ATPase subunit alpha-1	ATP1A1	113	33	0.689026	-0.17652	22.7288	22.6777	22.5506	22.2721	22.2838	22.8716
Q0IJ56;B4E0U6;A0A140VKA6;P50502;H7C3I1;Q1XBU6;B7ZA40;Q3KNR6;Q8IZP2;Q8NFI4;D6W507;F6VDH7	Hsc70-interacting protein;Putative protein FAM10A4;Putative protein FAM10A5	ST13;ST13P4;ST13P5;hCG_1990625	35.015	6	0.72527	-0.187795	20.4599	21.4595	20.4963	20.6615	21.09	20.1009
H3BM38;A8K287;O00161;H3BNE1;H3BR18;H3BPJ0;A0A024R9R8;O00161-2	Synaptosomal-associated protein;Synaptosomal-associated protein 23	SNAP23	13.905	5	0.693609	-0.188166	18.7076	19.5269	19.1789	18.8653	18.6552	19.3285
Q6ZNJ1-2;Q6ZNJ1-3;Q6ZNJ1;H0Y764	Neurobeachin-like protein 2	NBEAL2	282.86	3	0.821907	-0.191992	11.0129	14.1236	12.742	12.2935	13.0286	11.9804
D3DSM6;P41440;E9PIL5;A2VCN1;C9J8K6;C9JKP4;H3BTQ3;P41440-3;P41440-2	Folate transporter 1	SLC19A1	67.199	2	0.841706	-0.192497	15.5585	13.4047	15.3274	15.1785	12.8443	15.6903
B4E2L8;B2R6V9;P00488;Q9NQP5;A6PVK5	Coagulation factor XIII A chain	F13A1	70.343	2	0.876611	-0.194094	12.7369	16.9678	16.2438	13.6529	16.0702	15.6431
V9HWF2;P40925;P40925-3;B9A041;P40925-2;B8ZZ51;C9JF79	Malate dehydrogenase;Malate dehydrogenase, cytoplasmic	HEL-S-32;MDH1	36.426	8	0.73432	-0.196583	18.2985	18.8639	17.8564	18.7716	18.3367	17.3208
Q15375-2;Q15375-4;Q15375	Ephrin type-A receptor 7	EPHA7	111.5	6	0.683305	-0.200494	15.4416	14.7017	15.1642	14.5722	14.7064	15.4274
B4DSW9;B4DL06;B4DGU4;B5BU28;A0A024R2Q3;P35222	Catenin beta-1	CTNNB1	77.518	5	0.729463	-0.201246	18.0333	16.2807	17.2625	17.0252	16.7473	17.2003
A0A024QZP7;Q5H9N4;P06493;E5RIU6;A0A087WZZ9;I6L9I5;A0A024QZJ8;P06493-2	Cyclin-dependent kinase 1	CDC2;DKFZp686L20222;CDK1	34.081	7	0.663522	-0.201967	19.0261	19.4884	18.795	18.6305	18.825	19.2481
A0A0S2Z3G9;O43707;Q96BG6;O43707-2	Alpha-actinin-4	ACTN4	104.85	19	0.658993	-0.203946	17.656	18.5733	18.094	17.8978	17.9709	17.8427
Q6NVI1;P29966	Myristoylated alanine-rich C-kinase substrate	MARCKS	14.859	5	0.718983	-0.205875	20.0551	19.1859	20.1999	20.2178	18.8686	19.7368
A0A024RB27;Q504R6;P51153;D3DV69;A0A087WWB9	Ras-related protein Rab-13	hCG_24991;RAB13;hCG_1996054	22.745	3	0.682566	-0.207353	16.3269	16.9265	17.0072	16.2209	16.2524	17.1653
E9PMD7;A0A140VJS9;P62136;P62136-2;P62136-3;B3KXM2	Serine/threonine-protein phosphatase;Serine/threonine-protein phosphatase PP1-alpha catalytic subunit	PPP1CA	28.898	5	0.681858	-0.223117	17.4646	17.2679	17.6594	17.633	16.3662	17.7233
C9J5X1;P08069	Tyrosine-protein kinase receptor;Insulin-like growth factor 1 receptor;Insulin-like growth factor 1 receptor alpha chain;Insulin-like growth factor 1 receptor beta chain	IGF1R	154.79	3	0.720273	-0.224491	13.8549	12.5795	12.6097	13.6124	12.5992	12.159
A8K9B9;A0A024R9N6;Q9H223	EH domain-containing protein 4	EHD4	61.155	11	0.599047	-0.24074	17.8506	18.4661	18.541	18.0722	17.8184	18.245
P02786;G3V0E5	Transferrin receptor protein 1;Transferrin receptor protein 1, serum form	TFRC	84.87	23	0.703057	-0.241989	21.2475	22.9011	21.6662	20.9963	22.2012	21.8913
H0Y380;Q7Z3X4;H0Y4H1;H0Y7Z9;Q5W9G3;Q59FI2;H0Y6Z7;P10586-2;P10586;B4DWI5;B3KXA8;B3KWM1;B4DK48;B3KXJ7;Q59H90;Q3KPI9;F5GWR7;Q2HXI4;P23468-3;P23468-7;P23468-5;P23468-4;P23468-6;P23468-2;P23468	Receptor-type tyrosine-protein phosphatase F;Protein-tyrosine-phosphatase;Receptor-type tyrosine-protein phosphatase delta	PTPRF;DKFZp686B1310;LAR;PTPRD	111.19	7	0.609467	-0.243961	16.938	16.4017	16.6947	16.4356	15.979	16.888
A0A024R0L6;Q15102;M0R389;M0R1K3	Platelet-activating factor acetylhydrolase IB subunit gamma	PAFAH1B3	25.734	2	0.562492	-0.25397	15.125	14.9772	15.0157	15.0219	14.9012	14.4328
A8K8U3;A7E2D8;P23634-5;P23634-4;P23634-3;P23634-2	Calcium-transporting ATPase;Plasma membrane calcium-transporting ATPase 4	ATP2B4	128.78	3	0.655281	-0.258659	14.3848	13.9348	14.8907	14.303	13.3224	14.8088
Q9UBV8	Peflin	PEF1	30.381	3	0.633041	-0.261308	19.8518	20.6307	20.9275	20.1307	19.6908	20.8046
P11233;H7C3P7	Ras-related protein Ral-A	RALA	23.567	6	0.571487	-0.261484	20.1564	20.7198	20.6232	20.0203	20.0677	20.627
B4DKS0;A0A024R0H1;P53985;B2R6A5;Q5T8R5;P53985-2	Monocarboxylate transporter 1	SLC16A1	51.836	10	0.627041	-0.270809	23.4249	22.2013	22.3373	22.7187	21.8399	22.5925
A0A0S2Z6M9;Q9BYI3-3;Q9BYI3;H7C0W7	Hyccin	FAM126A	45.457	3	0.786191	-0.276463	12.1536	15.6769	13.9614	14.3864	12.4435	14.1326
Q13404-8;Q13404;E5RIF1;D6RG00;A0M8W4;H0YBX6;I3L0A0;Q15819;Q13404-7;Q13404-2;Q13404-1	Ubiquitin-conjugating enzyme E2 variant 1;Ubiquitin-conjugating enzyme E2 variant 2	UBE2V1;UBE2V2;TMEM189-UBE2V1	11.765	2	0.604495	-0.276869	18.9579	18.2748	17.4887	18.0933	17.893	17.9044
A0A024R3Q3;A0A024R0Y6;P84077;P61204;F5H423;B4DN70;B4DEB9;F5H0C7;B4E190;B4DJC8;P61204-2	ADP-ribosylation factor 1;ADP-ribosylation factor 3	ARF1;ARF3	20.697	7	0.647614	-0.280099	21.7127	23.0501	22.696	21.4403	22.3256	22.8527
A0A087X253;H0UID5;H0UID4;H0UID3;A8K916;A0A140VJE8;P63010-3;P63010;P63010-2;B4DWG4;A8K0G3;B4E261;Q68DI0;A0A087WYD1;A0A087WU93;A0A087WZQ6	AP complex subunit beta;AP-2 complex subunit beta	AP2B1;DKFZp781K0743	101.33	4	0.516318	-0.28421	15.5372	15.4948	15.8201	15.2023	15.175	15.6222
A0A0S2Z4C3;P07954-2;P07954;A0A0S2Z3S9;A0A0S2Z3W2;A0A0S2Z3X6;A0A0S2Z4H0	Fumarate hydratase, mitochondrial	FH	54.636	2	0.714329	-0.285208	15.496	14.8209	13.6133	15.2559	14.685	13.1336
Q86Y82;B1AJQ6;Q6LEU0;B4DSZ1	Syntaxin-12	STX12	31.642	6	0.687155	-0.286808	17.4659	19.7379	18.6057	17.8226	18.9581	18.1684
P61160;B4DWQ5;Q8IY98;F5H6T1;B4DHK9;P61160-2	Actin-related protein 2	ACTR2	44.76	7	0.589228	-0.287592	17.8011	19.1949	18.4904	18.1544	18.0042	18.465
Q02413	Desmoglein-1	DSG1	113.75	2	0.718291	-0.288255	13.6931	13.2297	10.8949	12.2935	12.4655	12.194
Q7RU07;B2R6I5;Q7Z509;O95807;B7Z5M7	Transmembrane protein 50A	SMP1;TMEM50A	17.4	2	0.559239	-0.290463	17.716	18.6007	18.2272	18.0155	18.2219	17.4352
A0A024R2K1;P20339-2;P20339;A0A0A1HAN9	Ras-related protein Rab-5A	RAB5A	23.658	3	0.616613	-0.292309	19.1937	19.4517	18.005	19.0307	18.6507	18.0921
V9HWC9;P00441;W8Q444;X5CN18;X5CHU1;A1YYW4;H7BYH4	Superoxide dismutase [Cu-Zn]	HEL-S-44;SOD1;SOD-1	15.936	2	0.599418	-0.29592	18.0744	18.2151	17.9143	18.2949	18.2002	16.8208
D6R974;V9HW74;B2RD14;D6R956;P09936;A6NLJ7;D6RE83	Ubiquitin carboxyl-terminal hydrolase;Ubiquitin carboxyl-terminal hydrolase isozyme L1	UCHL1;HEL-117	17.361	2	0.582896	-0.299786	18.8307	18.0199	17.8103	18.5602	17.4969	17.7045
Q8IY95-2;Q8IY95	Transmembrane protein 192	TMEM192	30.549	3	0.60115	-0.305519	15.9794	16.2059	16.3545	15.0483	15.7666	16.8084
B4E2U0;P52209-2;P52209;K7EM49;K7EPF6;K7EMN2;B4DL86	6-phosphogluconate dehydrogenase, decarboxylating	PGD	50.792	6	0.52192	-0.305797	17.4263	18.1041	17.4263	17.7299	17.2059	17.1035
Q9UJU6;Q9UJU6-2;Q9UJU6-3;B4DXL9;B4DDD6;Q9UJU6-6;F8WBG8;B4DUF9;Q59FH4;H0Y5J4;B4DDU5;B4DKZ4;Q9UJU6-5;Q9UJU6-4	Drebrin-like protein	DBNL	48.207	4	0.711951	-0.305974	14.3153	12.0583	14.8408	13.9747	13.4655	12.8563
B2R825;P06737-2;P06737;E9PK47	Alpha-1,4 glucan phosphorylase;Glycogen phosphorylase, liver form	PYGL	97.066	9	0.710201	-0.313422	14.9192	17.7646	16.6291	15.2714	16.6946	16.4066
G3V3U4;G3V3I1;G3V295;A0A140VK44;G3V5Z7;P60900;Q9BZ93;P60900-2	Proteasome subunit alpha type;Proteasome subunit alpha type-6	PSMA6	11.57	2	0.601016	-0.313577	18.3411	19.4495	18.056	18.6578	18.6415	17.6066
D3DWV2;X5D2U0;X5D9C4;Q59EV7;P48029-4;P48029;H7C249;H7C222;A0A023JDV9;X5D7P6;P48029-3;P48029-2	Transporter;Sodium- and chloride-dependent creatine transporter 1	hCG_2007960;SLC6A8	55.622	2	0.649129	-0.317828	15.2582	15.374	13.4288	14.9479	14.3748	13.7848
F8W9B8;B4E0U7;Q8IW24;A0A0A0MSI8;O00471;B4DHG4	Exocyst complex component 5	EXOC5	74.34	3	0.503909	-0.325811	13.3458	14.0635	14.0375	13.0538	13.7085	13.707
V9HWK1;P60174-1;P60174;Q53HE2;B4DUI5;Q2QD09;P60174-4	Triosephosphate isomerase	HEL-S-49;TPI1	26.669	11	0.477565	-0.325879	21.0085	20.9733	20.3526	20.6785	20.3816	20.2966
B4DJ85;Q92990-2;Q92990;M0QX84;M0QXG8	Glomulin	GLMN	66.709	2	0.470706	-0.329131	12.1536	12.5153	12.6097	11.7289	12.2136	12.3488
Q5T6H7;B3KSI7;Q9NQW7-2;Q9NQW7;Q9NQW7-4;Q9NQW7-3;Q5T6H3;Q5T6H2;B4E2P4	Xaa-Pro aminopeptidase 1	XPNPEP1	62.138	2	0.702299	-0.331103	12.1536	13.924	14.917	12.5127	13.1626	14.326
A0A024RAV5;P01116-2;L7RSL8;P01116	GTPase KRas;GTPase KRas, N-terminally processed	KRAS	21.424	2	0.532299	-0.332383	16.6522	17.9025	17.129	16.5271	16.9097	17.2497
A0A024R1U4;P51148;P51148-2;K7ENY4;K7ERI8;K7ERQ8	Ras-related protein Rab-5C	RAB5C	23.482	8	0.492111	-0.332445	21.2985	22.2509	21.5326	21.1268	21.5267	21.4312
A8K883;Q9BTT6;Q5T0G3;Q9BTT6-2	Leucine-rich repeat-containing protein 1	LRRC1	59.227	4	0.796057	-0.338717	15.8916	12.924	16.7256	15.3615	12.761	16.4026
A0A024R7V6;P61019;A0A0A1HAW1;P61019-2;E9PKL7	Ras-related protein Rab-2A	RAB2;RAB2A	23.545	7	0.574579	-0.34149	18.9453	20.6493	19.4103	18.8476	19.6017	19.5311
Q10567-3;Q10567-2;Q10567;Q10567-4;C9J1E7	AP-1 complex subunit beta-1	AP1B1	103.56	11	0.456538	-0.344047	17.0508	17.8603	17.5287	16.9852	17.2733	17.1492
P31689;P31689-2;B7Z5C0;Q9NXZ8	DnaJ homolog subfamily A member 1	DNAJA1;HDJ2	44.868	5	0.464711	-0.345684	18.8702	18.136	18.3865	18.2437	17.7663	18.3457
P43034;B4DF38;I3L3N5;B4DZN3	Platelet-activating factor acetylhydrolase IB subunit alpha	PAFAH1B1	46.637	2	0.526145	-0.35086	14.6687	15.3247	15.6188	15.3878	15.0168	14.155
B4DEB8;Q7Z3Z6;B4DDG0;B4DEA5;B4E171;P41732;Q7Z2D9	Tetraspanin;Tetraspanin-7	TM4SF2;TSPAN7	24.475	2	0.427119	-0.363054	18.561	18.0919	17.9571	18.0756	17.8556	17.5896
V9HWN7;J3KPS3;P04075;H3BQN4;P04075-2;H3BUH7;H3BR04	Fructose-bisphosphate aldolase;Fructose-bisphosphate aldolase A	HEL-S-87p;ALDOA	39.42	9	0.42951	-0.369773	20.8382	21.0723	20.5939	20.9039	20.3179	20.1733
Q9UPN1;F8VYE8;A0A024RBP2;P36873;P36873-2;A0A087WYY5;F8VR82;F8W0W8	Serine/threonine-protein phosphatase;Serine/threonine-protein phosphatase PP1-gamma catalytic subunit	PPP1CC	33.773	2	0.426693	-0.376267	17.2439	16.8231	17.5004	16.8884	16.446	17.1043
B2R5U3;A0A024R571;Q9H4M9;B4DMV9;B4DR44;B4DTR4;B4DZH9;C9JC03;C9J2Z4	EH domain-containing protein 1	EHD1	60.626	10	0.594391	-0.376783	17.9387	20.2218	19.2832	18.1988	19.1721	18.9424
Q92783-2;Q92783;B2RAY1;B4DZT2	Signal transducing adapter molecule 1	STAM	44.971	8	0.573404	-0.382959	19.36	17.9944	17.6432	18.8013	17.3754	17.672
H9KV75;B7Z565;A0A024R694;P12814-2;P12814;P12814-3;P12814-4;Q86TX4;B4DFY0;B3KUX9	Alpha-actinin-1	ACTN1	94.825	6	0.591656	-0.393073	13.7217	15.9512	15.2158	13.7929	15.0232	14.8935
B4DSN5;A8K3M3;P18031	Tyrosine-protein phosphatase non-receptor type;Tyrosine-protein phosphatase non-receptor type 1	PTPN1	41.26	2	0.612186	-0.395193	14.6089	12.5941	14.0454	13.9675	13.9014	12.194
V9HW65;A0A024R5Z7;P07355;P07355-2;H0YN42;H0YMD0;H0YMU9;A6NMY6;H0YKS4;B4DNH8;H0YM50;H0YNP5;B3KRQ1;H0YN28;H0YL33	Annexin;Annexin A2;Putative annexin A2-like protein	HEL-S-270;ANXA2;ANXA2P2	38.576	18	0.451139	-0.399043	20.893	21.9595	21.6261	20.7107	20.9858	21.585
Q71UA6;Q15758;Q59ES3;M0QXM4;Q15758-3;Q15758-2;B4DE27	Amino acid transporter;Neutral amino acid transporter B(0)	SLC1A5	56.583	13	0.370839	-0.399565	22.4571	22.3522	21.9361	21.722	21.7907	22.0341
F8W1R7;G3V1V0;P60660-2;P60660;J3KND3;G8JLA2;B7Z6Z4;G3V1Y7;F8VPF3;Q6IBG5	Myosin light polypeptide 6	MYL6	16.29	7	0.551222	-0.402661	19.4615	20.941	20.1075	20.3008	20.2687	18.7325
B2R728;A0A024RDQ9;P30825;Q5JR49;A0A0A8K9B7	High affinity cationic amino acid transporter 1	SLC7A1	67.65	2	0.544337	-0.403591	17.1294	17.5739	17.7583	16.2419	16.6969	18.312
B4E1E2;A0A0S2Z4Q4;A0A0S2Z4R4;O14964-2;O14964;B4DFP5;I3L1P5	Hepatocyte growth factor-regulated tyrosine kinase substrate	HGS	74.854	6	0.614793	-0.405998	19.8389	17.7965	17.6001	18.9775	17.2892	17.7508
A0A024RC87;A0A140VJT8;P13489;E9PMJ3;E9PLZ3;E9PIM9	Ribonuclease inhibitor	RNH1	49.416	3	0.5563	-0.406334	15.6133	15.2972	14.8935	15.5604	15.4899	13.5348
A0A024R1Z6;Q99536;Q99536-3;B3KUF8;Q99536-2	Synaptic vesicle membrane protein VAT-1 homolog	VAT1	41.92	7	0.423997	-0.409554	17.9944	19.1803	18.3967	18.0958	18.3302	17.9168
V9HW59;Q6LES2;P09525;Q6P452;B4DE02;B4DDZ4;P09525-2;Q59FK3	Annexin;Annexin A4	HEL-S-274;ANXA4	36.057	10	0.677339	-0.410793	16.6777	19.8197	19.0469	16.8726	18.4835	18.9559
A0A158RFU6;P51149;B4DPH9;C9J592;C9J8S3;C9IZZ0;C9J4V0	Ras-related protein Rab-7a	RAB7A	23.489	12	0.422963	-0.411964	21.2095	22.3456	21.583	21.276	21.5951	21.0311
P98172	Ephrin-B1	EFNB1	38.006	2	0.551591	-0.416338	16.5276	14.6589	14.6301	14.6706	14.4012	15.4957
B7Z1N6;A8MVZ9;B7Z1Y2;A0A024QZ64;B7Z3K9;P09972;K7EKH5;J3KSV6;J3QKP5;C9J8F3	Fructose-bisphosphate aldolase;Fructose-bisphosphate aldolase C	ALDOC	35.423	5	0.554159	-0.416988	16.0504	18.4373	17.1901	16.5984	17.2095	16.619
Q9UEL4;Q5U0H8;A8K5D4;O95297-4;O95297-2;O95297	Myelin protein zero-like protein 1	MPZL1	26.551	3	0.501158	-0.41814	19.2633	18.7162	19.4398	18.1022	18.2715	19.7912
O75886;O75886-2	Signal transducing adapter molecule 2	STAM2	58.164	5	0.583834	-0.419054	17.6582	15.7122	15.9099	17.0093	15.2323	15.7814
P08754	Guanine nucleotide-binding protein G(k) subunit alpha	GNAI3	40.532	6	0.344076	-0.419203	19.499	19.5538	19.3591	19.0026	18.8104	19.3413
Q16513-5;Q16513-4;Q16513-3;Q16513-2;Q16513;Q9UHS4;B1AL79	Serine/threonine-protein kinase N2	PKN2	75.171	2	0.476132	-0.428964	13.8984	12.7437	13.1871	13.6516	12.6968	12.194
A0A024R872;Q96TA1-2;Q96TA1;Q2YD88;Q9H8K1	Niban-like protein 1	C9orf88;FAM129B	82.682	2	0.393225	-0.437816	13.8983	13.7001	13.1998	13.1838	12.6301	13.6708
H7C463;C9J406;B4DT20;B4DS66;B9A067;B4DQY2;B4DKR1;Q16891-3;Q16891-2;Q16891-4;Q16891	MICOS complex subunit MIC60	IMMT	68.064	4	0.705218	-0.438652	16.3652	13.2642	12.7697	14.8685	14.0207	12.194
B4E106			51.878	2	0.533875	-0.438756	20.5532	19.5258	18.5592	19.9613	18.6752	18.6854
Q7Z427;Q7Z426;Q92734-2;Q92734;Q05BK6;Q8TDJ5;Q92734-4;Q92734-3;C9JJP5	Protein TFG;Tyrosine-protein kinase receptor	TFG;TFG/ALK fusion	38.703	4	0.45697	-0.448835	20.651	20.2201	19.2795	20.1879	19.6815	18.9347
O00186	Syntaxin-binding protein 3	STXBP3	67.764	7	0.380662	-0.452013	18.0941	17.7265	17.9881	17.6443	16.8081	18.0002
Q6IB58;Q5ST80;Q53HQ0;O75955-2;O75955;A2VCL5;A0A140T9R1;A2AB10;A0A140T9X0;A2AB12;A2AB09	Flotillin-1	FLOT1	47.337	8	0.342724	-0.458848	17.8207	18.0627	17.2491	16.9498	17.5013	17.3049
B2R627;A8K6A5;A0A024RB01;P08648	Integrin alpha-5;Integrin alpha-5 heavy chain;Integrin alpha-5 light chain	ITGA5	114.48	5	0.408474	-0.461498	16.114	15.2934	15.5259	15.2167	14.4947	15.8373
A4QPB0;A0A024RC65;P46940;H0YLE8;B4E2M0;A0A0J9YXZ5	Ras GTPase-activating-like protein IQGAP1	IQGAP1;hCG_1991735	189.28	22	0.278799	-0.468813	17.2071	16.9707	17.1337	16.7105	16.5295	16.6652
V9HW38;P28838-2;P28838;H0Y9Q1;B4DQG5	Cytosol aminopeptidase	HEL-S-106;LAP3	56.049	4	0.372463	-0.468955	15.9521	15.5627	15.1162	15.6054	14.5442	15.0746
A0A024R5S9;Q96PU5-3;P46934-4;Q96PU5-2;Q96PU5-6;Q96PU5-5;Q96PU5-7;Q96PU5;H0Y8H4;K7EKL1;K7ERN1;A0A024R281;B7Z2P9;B7Z6K0;A0A024R2A4;H0Y8X6;A0A1B0GVY1;Q96PU5-9;Q96PU5-4;P46934-3;P46934-2;P46934	E3 ubiquitin-protein ligase NEDD4-like;E3 ubiquitin-protein ligase NEDD4	NEDD4;NEDD4L	104.16	2	0.464744	-0.471027	14.4934	15.9838	14.3798	14.1153	15.1426	14.186
B4DNY3;B4DNW7;B4DI38;D3DPU2;B2RDY9;Q01518-2;Q01518;B4DUZ8;B4DNA3;Q5T0R7;Q5T0R6;Q5T0R5;Q5T0R4;Q5T0R3;Q5T0R2;Q5T0R1;Q5T0R9	Adenylyl cyclase-associated protein;Adenylyl cyclase-associated protein 1	CAP1	43.706	6	0.451669	-0.472785	17.5889	19.3659	18.1184	17.4835	18.3622	17.8092
P62070;P62070-4;E9PK85;P62070-3;A0A024QZF2;P62070-2;P10301	Ras-related protein R-Ras2;Ras-related protein R-Ras	RRAS2;RRAS	23.399	4	0.295635	-0.476051	19.7284	19.5619	19.0797	18.9664	18.927	19.0485
Q9H3U1-2;Q9H3U1	Protein unc-45 homolog A	UNC45A	101.67	2	0.313355	-0.476515	12.5085	12.1403	12.6097	11.5244	12.0936	12.211
P35221;P35221-2;B4DU00;B4E2G8;B4DKT9;G3XAM7;P35221-3;B3KSR8	Catenin alpha-1	CTNNA1	100.07	12	0.39431	-0.477458	18.551	17.2994	18.0485	17.8661	16.9348	17.6656
A0A087X208;O00468-2;O00468-6;O00468-3;O00468-5;O00468-4;O00468-7;O00468	Agrin;Agrin N-terminal 110 kDa subunit;Agrin C-terminal 110 kDa subunit;Agrin C-terminal 90 kDa fragment;Agrin C-terminal 22 kDa fragment	AGRN	202.29	12	0.706603	-0.481707	13.1624	13.6655	15.4677	16.3507	12.3058	12.194
A0A024R816;Q9C0H2-3;Q9C0H2-2;Q9C0H2;Q9C0H2-4;H7C3T6	Protein tweety homolog;Protein tweety homolog 3	TTYH3	57.544	3	0.501271	-0.482452	15.1474	13.8097	13.3063	14.4841	13.5213	12.8106
Q6FGX3;A0A024R5J5;A0A024R5H8;P20340-2;P20340;B7Z5Z9;Q53ET8;P20340-4	Ras-related protein Rab-6A	RAB6A	23.549	5	0.356188	-0.484987	21.3158	22.5876	21.6781	21.3416	21.5338	21.2511
Q6NUK7;P07948-2;B4DQ79;P07948;A8K379	Non-specific protein-tyrosine kinase;Tyrosine-protein kinase Lyn	LYN	65.808	11	0.40497	-0.485589	17.6712	18.9024	17.244	17.3059	17.5723	17.4826
M0R116;Q53ES0;B7Z9V4;A0A0A0MT26;P13637;P13637-2;P13637-3;B7Z3F8;B7Z1Q9;B3KV59;B3KRI1;B1AKY9;B2RAQ4;A0A0S2Z3W6;P50993;B3KSY7;B3KX35;H0Y7C1;B4DIQ8	Sodium/potassium-transporting ATPase subunit alpha-3;Sodium/potassium-transporting ATPase subunit alpha-2	ATP1A3;ATP1A2	108.28	2	0.326221	-0.487536	14.1887	14.8301	14.4128	13.4753	14.2723	14.2214
E7ENQ1;G3XAA2;H7C360;V9HWH3;G5E948;B7Z3V5;Q53TX8;E7EN19;E7ESS2;B7Z388;A0A0D9SEY1;O95819-4;O95819-2;O95819;O95819-5;O95819-3;C9J840;E7EX83;A0A0D9SG62;Q5MD60;H7C0P6;Q8N4C8-5;Q8N4C8-2;Q8N4C8-3;Q8N4C8-4;Q8N4C8	Mitogen-activated protein kinase kinase kinase kinase 4;Misshapen-like kinase 1	MAP4K4;HEL-S-31;MINK1	132.16	8	0.271491	-0.490615	15.7784	16.0777	16.1736	15.7204	15.4077	15.4298
A0A024RD41;Q9ULC3	Ras-related protein Rab-23	RAB23	26.659	4	0.439762	-0.490946	17.7978	16.5666	15.9127	16.5785	15.8304	16.3954
A0A0A0MRA8;Q9Y2J2-2;Q9Y2J2-4;A0A0A0MSA4;Q9Y2J2;B3KY28;A8K968;B7Z8M8;Q9Y2J2-3	Band 4.1-like protein 3;Band 4.1-like protein 3, N-terminally processed	EPB41L3	102.29	7	0.277154	-0.503373	16.7187	16.0692	16.2631	16.0517	15.7107	15.7784
E9PLL0;E9PQA6;A8K0C2;A0A024R7L6;Q96EY5-3;Q96EY5;M0QZK6;E9PLZ8;Q96EY5-2	Multivesicular body subunit 12A	MVB12A;LOC93343	12.987	2	0.329471	-0.50586	18.8834	18.9276	18.1699	18.0214	17.7587	18.6832
Q59E89;Q9UDY4;B4DNN2	DnaJ homolog subfamily B member 4	DNAJB4	38.612	5	0.635179	-0.508132	15.5971	19.1941	17.2217	15.6684	18.0613	16.7587
Q53HL1;J3QRS3;P19105;O14950	Myosin regulatory light chain 12A;Myosin regulatory light chain 12B	MYL12A;MYL12B	19.793	2	0.554284	-0.511232	15.7612	18.5771	17.793	16.9753	17.5935	16.0288
Q53FX5;Q9NUP9;G3V1D4;H0YIA8;O14910	Protein lin-7 homolog C;Protein lin-7 homolog A	LIN7C;LIN7A	21.82	4	0.548858	-0.51288	19.2139	16.7109	16.8554	17.8509	16.2078	17.1829
B7ZL91;Q16819	Metalloendopeptidase;Meprin A subunit alpha	MEP1A	87.896	3	0.701825	-0.513652	15.9343	16.0933	12.4229	14.8934	15.8222	12.194
Q6FG43;J3QLD9;A0A024QZ62;E7EMK3;Q14254;Q9BTI6	Flotillin-2	FLOT2;hCG_1998851	41.685	5	0.27562	-0.520799	17.1959	17.7556	17.4372	16.6408	16.8541	17.3314
Q9UNE7;Q9UNE7-2;H3BS86	E3 ubiquitin-protein ligase CHIP	STUB1	34.856	5	0.302229	-0.523294	17.586	18.2476	17.3869	17.4295	17.438	16.7831
Q9NRX5	Serine incorporator 1	SERINC1	50.494	3	0.287443	-0.524252	18.2876	18.7928	19.2279	18.0541	18.1825	18.499
Q96FS1;C9JZR2;O60716-21;O60716-19;O60716-18;O60716-17;O60716-13;O60716-11;O60716-10;O60716-9;O60716-5;O60716-3;O60716-2;O60716;Q68DU0;O60716-24;O60716-23;O60716-22;O60716-20;O60716-16;O60716-15;O60716-14;O60716-12;O60716-8;O60716-7;O60716-6;O60716-4;Q7KZJ3;A0A024R4Z0;O60716-29;O60716-27;O60716-26;O60716-25;A0A024R4Y7;O60716-32;O60716-31;O60716-30;O60716-28	Catenin delta-1	CTNND1;DKFZp781O2021	92.387	14	0.36163	-0.526721	18.4028	17.216	17.3065	17.7151	16.8939	16.7361
A0A024R151;Q8WWI5-3;Q8WWI5-2;Q8WWI5;B3KWF2;B3KMS7	Choline transporter-like protein 1	SLC44A1	73.301	6	0.322548	-0.532372	17.1513	18.1108	17.4432	16.8152	17.6149	16.678
Q9H3K6-2;Q9H3K6;H3BV85;H3BTW0;A0A0B4J295;A0A087WZT3;H3BVE0	BolA-like protein 2	BOLA2;BOLA2B	6.8417	2	0.367359	-0.535286	18.4702	19.0204	18.8329	18.9346	18.4933	17.2897
P48047;Q53HH2;H7C086;H7C0C1	ATP synthase subunit O, mitochondrial	ATP5O	23.277	4	0.478331	-0.540021	18.9264	16.6298	17.1838	17.7084	17.0757	16.3359
Q9Y2A7;Q9Y2A7-2	Nck-associated protein 1	NCKAP1	128.79	6	0.344338	-0.542344	14.614	15.4805	15.7372	14.0685	14.992	15.1443
A0A087WW77;Q15334	Lethal(2) giant larvae protein homolog 1	LLGL1	114.43	2	0.373348	-0.544521	14.8157	13.3443	13.3983	13.713	13.3977	12.8141
A0A1B0GUZ7;Q14156-3;Q14156-2;Q14156;E5RJS1	Protein EFR3 homolog A	EFR3A	96.13	3	0.223275	-0.546391	14.7952	15.2992	15.0498	14.5145	14.4815	14.509
V9HWI0;P14550;V9GYG2;V9GYP9;Q5T621	Alcohol dehydrogenase [NADP(+)]	HEL-S-165mP;AKR1A1	36.573	4	0.306076	-0.547415	16.2586	17.5313	17.1132	16.1547	16.5177	16.5884
Q6NUR7;E7EQR4;B2R6J2;P15311;B7Z5V2;V9HW42;B7Z437;J7M2B1	Ezrin;Tyrosine-protein kinase receptor	EZR;HEL-S-105;EZR-ROS1	69.241	5	0.259089	-0.548324	17.6763	18.2737	18.3327	17.3554	17.9108	17.3715
A0A024RBC7;P20020-6;P20020-3;P20020-4;P20020;P20020-5;P20020-2;E7ERY9;Q59H63	Calcium-transporting ATPase;Plasma membrane calcium-transporting ATPase 1	ATP2B1	134.68	16	0.215136	-0.551465	18.8305	19.2031	18.8845	18.4995	18.3601	18.4041
A0A024R1N1;P35579;A0A0U4BW16;P35579-2;Q86XU5	Myosin-9	MYH9	226.53	39	0.465416	-0.55273	17.6121	19.7722	18.7984	17.7987	19.1335	17.5922
B3KY04;A0A140VJM4;Q96CX2	BTB/POZ domain-containing protein KCTD12	KCTD12	35.73	8	0.303843	-0.55346	18.1898	18.1864	18.1656	18.3637	17.5476	16.9701
Q8NBY1;Q499L9;B4E0Y9;Q9P289-2;Q9P289;Q9NWX4;Q9P289-3;C9JDH9;C9J6L2;C9JCC0;C9J232;H7C279;Q5CZ67;B4E185;B4DMA5;B4DMR0;B3KRS6;A0A0S2Z4Y2;B4DVS7;H0Y630;B4DR80;Q96BA2;A0A024R4B2;Q6P0Y1;Q5U0E6;B4DT57;O00506-3;O00506-2;O00506;Q9Y6E0-2;Q9Y6E0	Serine/threonine-protein kinase 26;Serine/threonine-protein kinase 25;Serine/threonine-protein kinase 24;Serine/threonine-protein kinase 24 36 kDa subunit;Serine/threonine-protein kinase 24 12 kDa subunit	STK26;MST4;STK25;DKFZp686J1430;STK24;HEL-S-95	43.867	5	0.371521	-0.557769	16.9832	17.9294	18.7178	16.7786	17.6171	17.5614
Q9Y6M5	Zinc transporter 1	SLC30A1	55.299	3	0.400878	-0.55914	16.2938	17.7603	16.2652	15.564	16.9696	16.1083
B3KTA3;Q16658	Fascin	FSCN1	52.276	3	0.205383	-0.56171	16.2504	16.1296	16.2383	15.7381	15.4393	15.7558
Q9Y4E8-2;Q9Y4E8-3;Q9Y4E8	Ubiquitin carboxyl-terminal hydrolase 15	USP15	109.3	3	0.538751	-0.562927	12.1536	12.5153	12.6097	10.6304	13.8795	11.08
A0A024R6S1;O60884;A0A087WT48	DnaJ homolog subfamily A member 2	DNAJA2	45.745	3	0.267236	-0.566653	15.8028	16.1211	16.5386	15.1824	15.4971	16.083
P63096;P63096-2;C9JPP4	Guanine nucleotide-binding protein G(i) subunit alpha-1	GNAI1	40.361	3	0.386324	-0.57248	16.2416	15.6041	17.1782	15.7617	15.0171	16.5276
P37802;P37802-2;X6RJP6	Transgelin-2	TAGLN2	22.391	9	0.310084	-0.57373	19.432	20.8165	19.9372	19.9074	19.3442	19.2129
A0A024R705;Q9UN37;Q9NXK5;Q9UF30;I3L4J1	Vacuolar protein sorting-associated protein 4A	VPS4A;DKFZp434E0418	48.897	6	0.243863	-0.582512	18.5131	19.2011	19.2454	18.5516	18.6472	18.0134
Q7Z5G4-3;Q7Z5G4	Golgin subfamily A member 7	GOLGA7	15.578	4	0.244312	-0.582662	19.6945	19.4976	18.9835	18.7544	19.2255	18.4478
A0A0S2Z487;A0A024R1X8;P14923;A0A0S2Z495	Junction plakoglobin	JUP	81.744	14	0.296455	-0.582882	18.8295	18.2086	18.1511	18.3119	17.0568	18.0719
Q8NCD8;A0A024R124;F8VX04;Q9H2H9	Sodium-coupled neutral amino acid transporter 1	SLC38A1	45.641	2	0.413921	-0.586558	18.6173	17.8116	18.1485	17.0752	16.7761	18.9665
V9HWI5;P23528;G3V1A4;E9PP50;E9PK25	Cofilin-1	HEL-S-15;CFL1	18.502	11	0.259355	-0.586646	23.1126	24.2303	23.4153	22.9514	23.2427	22.8041
Q548N1;Q9UK41;E9PQR7;Q9UK41-2;A0A0S2Z5H5;E9PM90	Vacuolar protein sorting-associated protein 28 homolog	VPS28	25.425	6	0.561833	-0.586775	19.1114	21.4443	21.3995	18.4254	20.3859	21.3836
B4DLT1;O75436;A8K3C1;S4R3Q6;O75436-2	Vacuolar protein sorting-associated protein 26A	VPS26A	36.571	3	0.314197	-0.587584	16.0128	15.8564	15.7782	16.0856	15.3915	14.4076
F8VR50;C9JZD1;B4DM63;Q2LE71;B2R4D5;O15145	Actin-related protein 2/3 complex subunit 3	ARPC3	9.7261	2	0.364881	-0.588088	17.5736	19.5816	18.389	17.8385	18.2709	17.6706
Q6FIG4;Q9H0U4;E9PLD0;Q92928	Ras-related protein Rab-1B;Putative Ras-related protein Rab-1C	RAB1B;RAB1C	22.198	7	0.350628	-0.591191	21.6019	23.248	21.9585	21.1298	22.1561	21.7489
Q86VN1-2;Q86VN1;Q59H03	Vacuolar protein-sorting-associated protein 36	VPS36	36.957	4	0.454175	-0.595951	16.3454	17.6187	15.1123	15.3171	16.6396	15.3318
Q12846-2;Q12846;C9JFM5;B7Z425	Syntaxin-4	STX4;STX4A	33.84	3	0.222153	-0.597535	18.8737	19.3015	18.7111	18.118	18.1864	18.7892
A0A0S2Z472;A8KAH7;A0A024R2W3;P13861-2;P13861;H7C1L0	cAMP-dependent protein kinase type II-alpha regulatory subunit	PRKAR2A	43.066	4	0.642526	-0.599873	16.0918	16.2172	13.6686	15.4285	16.5555	12.194
M0R0Y2;A0A024R0R9;P54920;M0R2M1	Alpha-soluble NSF attachment protein	NAPA	29.163	7	0.260674	-0.600689	18.1429	19.3362	18.2306	18.0668	17.9239	17.917
V9HWE0;P08758;D6RBL5;D6RBE9	Annexin;Annexin A5	HEL-S-7;ANXA5	35.936	15	0.44026	-0.603822	21.2315	23.1502	22.5766	20.7816	21.5395	22.8257
Q5U091;P01111	GTPase NRas	NRAS	21.229	5	0.263235	-0.605157	20.3618	21.3415	20.3007	19.7028	20.0305	20.4551
A0A024R8M0;Q14344;B4DWV9;Q14344-2	Guanine nucleotide-binding protein subunit alpha-13	GNA13	44.049	7	0.425782	-0.606096	17.7402	19.0942	16.5391	17.2713	17.6283	16.6556
B4DYG5;Q4LE69;P42356;B2RBS0;A0A140VK35;D3DX33;P42356-2	Phosphatidylinositol 4-kinase alpha	PIK4CA variant protein;PI4KA;hCG_1999854	236.75	8	0.256225	-0.609506	15.5071	14.8107	14.3604	14.6939	14.0882	14.0676
Q8WUM4;Q8WUM4-2;B7Z5C1	Programmed cell death 6-interacting protein	PDCD6IP	96.022	38	0.188787	-0.627187	21.9444	21.4303	21.403	21.2148	20.9829	20.6984
B4DH39;O60488-2;O60488;Q8TAF6	Long-chain-fatty-acid--CoA ligase 4	ACSL4;FACL4	72.143	10	0.22409	-0.629125	17.2514	16.938	17.0892	15.8044	16.7446	16.8423
Q9UIW2	Plexin-A1	PLXNA1	211.06	6	0.262062	-0.629854	14.9031	15.1886	13.767	14.1298	13.978	13.8614
A0A087X0K1;Q7Z4X0;A0A024R496;Q9Y376	Calcium-binding protein 39	CAB39	39.452	4	0.214139	-0.639232	17.1498	18.1247	18.1102	17.0118	17.1479	17.3072
Q6ICQ8;P84095	Rho-related GTP-binding protein RhoG	ARHG;RHOG	21.308	3	0.263456	-0.642031	18.5176	19.8698	18.7054	18.014	18.6494	18.5033
E9PHY5;O43491-4;O43491;E9PK52;O43491-3;E9PII3;O43491-2;Q59FD8;I6L9B1	Band 4.1-like protein 2	EPB41L2	104.36	15	0.169792	-0.646984	18.1861	17.5065	17.8296	17.2512	17.2421	17.0878
A6PW57;Q99755-2;Q99755-4;Q99755-3;Q99755;A2A3N6;B4DY52	Phosphatidylinositol 4-phosphate 5-kinase type-1 alpha;Putative PIP5K1A and PSMD4-like protein	PIP5K1A;PIPSL	61.257	4	0.397544	-0.648429	15.9927	16.3118	15.9722	16.1534	16.3071	13.871
V9HWJ2;V9HW78;Q6FIA4;Q6FI37;B2R5M8;O75874;Q0QER2;C9J4N6;B4DXS4	Isocitrate dehydrogenase [NADP];Isocitrate dehydrogenase [NADP] cytoplasmic	HEL-S-26;HEL-216;IDH1	46.659	4	0.197907	-0.648731	15.1174	15.8565	15.2689	15.1114	14.7792	14.4059
Q5JWQ6;Q59F20;Q6X907;E9PEP6;A8K9V7;Q68DN3;O14786;Q71SW6;E7EX60;Q9H2E1;Q5T7F0;O14786-3;O14786-2	Neuropilin-1	NRP1;DKFZp781F1414	81.989	3	0.282467	-0.651377	15.5946	14.6935	14.3144	14.1382	13.6314	14.8788
A4D2P2;A4D2P1;A4D2P0;P63000;P63000-2;A0A024R9T5	Ras-related C3 botulinum toxin substrate 1	RAC1;hCG_20693	16.797	5	0.18579	-0.657645	21.9399	22.5	21.6053	21.1646	21.3657	21.5421
X5D2F4;B3KWV6;Q7L576;A0A0G2JR96;A0A0G2JQT1;Q7L576-2	Cytoplasmic FMR1-interacting protein 1	CYFIP1	145.17	11	0.212217	-0.658241	16.1183	16.9994	17.019	15.6429	16.2778	16.2411
Q6IAT1;B4DLV7;P50395;P50395-2;Q5SX87	Rab GDP dissociation inhibitor beta	GDI2	50.663	14	0.282587	-0.661991	18.6775	20.0255	19.5093	18.0262	19.2837	18.9165
A8K9J6;A0A0C4DGH0;B4DK26;A8K6Q6;Q5ZPR3-3;Q5ZPR3-4;Q5ZPR3;H0YN29;H0YL10;Q5ZPR3-2	CD276 antigen	CD276	41.709	2	0.169385	-0.673583	17.3213	17.3525	17.846	17.1521	16.4807	16.8662
O15400-2;O15400;B4DH37	Syntaxin-7	STX7	27.4	4	0.156738	-0.675492	19.4886	19.8981	19.1931	18.9706	18.8326	18.7502
Q53GC2;A0A024R3U9;P20338;A0A0A1HAV9	Ras-related protein Rab-4A	RAB4A	24.331	5	0.380906	-0.681224	17.295	19.4543	17.6919	16.7189	18.3137	17.3649
Q53GK6;Q53G76;Q1KLZ0;P60709;B4E335;Q8WVW5;Q53G99;B4DW52;B3KWQ3;Q6PJ43;B7ZAP6	Actin, cytoplasmic 1;Actin, cytoplasmic 1, N-terminally processed	PS1TP5BP1;ACTB;ACTG1	41.722	23	0.167842	-0.682515	25.8004	26.5412	25.7284	25.4794	25.3123	25.2307
V9HWG7;Q53H17;Q53GN4;Q59ER5;O75083;B4DY05;B3KXN4;O75083-3	WD repeat-containing protein 1	HEL-S-52;WDR1	66.193	5	0.289377	-0.68556	15.6392	17.2027	17.1822	15.6312	15.769	16.5673
L7RXH0;A5YM53;P06756-3;P06756-2;P06756	Integrin alpha-V;Integrin alpha-V heavy chain;Integrin alpha-V light chain	ITGAV	116.04	3	0.235333	-0.68882	13.7089	14.7639	13.6374	12.9382	13.182	13.9235
C9J0A7;B2RE76;Q9UQN3-2;Q9UQN3;A0A087WW88	Charged multivesicular body protein 2b	CHMP2B	20.772	2	0.189571	-0.690962	19.4197	18.6026	18.8107	18.6931	18.2495	17.8176
P61981;B4DHC4;B3KNB4;B4DE78	14-3-3 protein gamma;14-3-3 protein gamma, N-terminally processed	YWHAG	28.302	3	0.152844	-0.693724	19.0873	19.8649	19.3114	18.8041	18.7463	18.632
V9HW53;O95865	N(G),N(G)-dimethylarginine dimethylaminohydrolase 2	HEL-S-277;DDAH2	29.644	2	0.285844	-0.697253	16.1944	16.2481	16.4277	15.2478	16.7599	14.7707
O75054;O75054-2	Immunoglobulin superfamily member 3	IGSF3	135.19	4	0.265533	-0.698832	15.245	13.6703	13.9618	13.7068	13.0661	14.0077
A0A024R4S0;M0R1T5;O43633	Charged multivesicular body protein 2a	CHMP2A	25.104	3	0.16629	-0.705203	19.5977	19.7941	19.1317	19.2566	18.6676	18.4836
B3KY03;B3KMS0;Q15021;A0PJ76;E7EN77;Q6ZV00	Condensin complex subunit 1	NCAPD2	152.86	3	0.299278	-0.705337	12.1536	12.5153	12.6097	10.4861	12.5787	12.0978
P23229-7;P23229-4;P23229-2;P23229-5;P23229-3;P23229-9;P23229-6;P23229	Integrin alpha-6;Integrin alpha-6 heavy chain;Integrin alpha-6 light chain;Processed integrin alpha-6	ITGA6	106.58	7	0.430065	-0.707265	14.4618	17.1104	15.4807	14.7384	16.1413	14.0514
A0A024R732;Q13425;A0A140TA73;Q13425-2	Beta-2-syntrophin	SNTB2	57.949	3	0.260944	-0.71185	15.6332	15.2727	15.2568	13.8213	14.4962	15.7097
Q59EH3;P24666-3;P24666-2;P24666;F2Z2Q9;O75702;G5E9R5;D3YTI2;A0A140VK37;P24666-4	Low molecular weight phosphotyrosine protein phosphatase	ACP1	18.698	2	0.161815	-0.717743	16.9397	17.7562	17.2425	16.975	16.5143	16.2958
Q59EY4;B4DUD6;Q8TC62;E7ES33;Q3LIE9;A4GYY8;A8K3D0;E7EPK1;Q16181-2;Q16181;Q3B7A3;B4DNE4;B4DPQ6;A0A024RA87;G3V1Q4;A0A023T695;A0A0U1RRH9;A0A0U1RRE1	Septin-7	SEPT7;Nbla02942;DKFZp686F17268	43.826	4	0.123903	-0.728177	17.3722	17.2192	16.812	16.2785	16.4537	16.4867
A0A024R824;O15431;Q9BT69;Q6P708	High affinity copper uptake protein 1	SLC31A1	21.09	2	0.159869	-0.731253	20.694	21.2786	21.0815	19.7997	20.2984	20.7622
O15439-2;O15439;Q59GY6;A8K2Q2;O75555;O15439-4;O15439-3	Multidrug resistance-associated protein 4	ABCC4;MOAT-B	144.2	3	0.551746	-0.733873	12.3799	16.3357	13.7658	12.0169	15.0677	13.1952
Q5U025;P62330;Q6FH17	ADP-ribosylation factor 6	ARF6	20.211	4	0.166829	-0.746724	20.5021	21.3027	20.5945	19.5614	20.0957	20.5019
P13612;B4E0Q2;E7EP60;Q6PJE7;Q59H74	Integrin alpha-4	ITGA4	114.9	3	0.112815	-0.747423	15.9249	15.7032	15.4109	14.9805	15.0093	14.8069
P48426-2;P48426;H7BXS3;B4DH09	Phosphatidylinositol 5-phosphate 4-kinase type-2 alpha	PIP4K2A	39.802	3	0.383551	-0.752255	15.1133	17.8015	16.584	14.7395	16.4506	16.0519
F6RFD5;V9HWA6;P60981;B7Z9M9;P60981-2	Destrin	DSTN;HEL32	15.397	2	0.13993	-0.759143	19.6983	20.5442	19.943	19.2514	19.6202	19.0365
K7EK18;K7EL40;A0A0S2Z5W9;A0A024R8Q0;A0A0S2Z5A5;A0A024R8V0;Q9UHD8-4;Q9UHD8-9;Q9UHD8-3;Q9UHD8-8;Q9UHD8-7;Q9UHD8-2;Q9UHD8-5;Q9UHD8;K7ER52;K7EIE4;K7EQD7	Septin-9	40057	22.217	2	0.158702	-0.762741	16.4417	17.1753	16.5624	15.9171	16.4923	15.4818
Q9Y3L5;F6U784;P10114	Ras-related protein Rap-2c;Ras-related protein Rap-2a	RAP2C;RAP2A	20.745	7	0.131139	-0.768576	19.8038	20.2295	19.9534	18.8877	19.0601	19.7333
Q53R19;O15144;G5E9S7;C9JTV5;G5E9J0	Actin-related protein 2/3 complex subunit 2	ARPC2	34.333	3	0.168509	-0.771259	17.4905	18.5826	17.7345	16.7359	17.5831	17.1748
D6RGI3;D6RER5;Q9NVA2;Q9NVA2-2;D6RDP1;D6R9Y6;D6RDU5	Septin-11	40787	49.005	4	0.378889	-0.773056	18.3723	17.1547	15.7094	17.2785	16.3138	15.325
B2R5I8;Q13637	Ras-related protein Rab-32	RAB32	24.956	2	0.329007	-0.774487	15.6934	18.1883	17.0156	15.727	16.9883	15.8585
A0A024R7Z5;O00560;O00560-3;B4DQ93;B4DHN5;E9PBU7	Syntenin-1	SDCBP	32.444	9	0.105245	-0.779557	22.493	22.5937	22.8117	21.9284	21.5381	22.0933
P05556;P05556-2;P05556-5;P05556-4;P05556-3	Integrin beta-1	ITGB1	88.414	10	0.133575	-0.779956	19.4158	20.0102	19.0582	18.4364	18.9226	18.7853
Q59G46;K7ER96;V9HW51;B2R960;O43396;K7EML9;B3KT45	Thioredoxin-like protein 1	TXNL1;HEL-S-114	31.355	2	0.451357	-0.782081	14.1097	15.7784	15.4413	15.2398	15.5493	12.194
A0A024R324;P61586;B4DKN9;Q9BVT0;A0A0B6XK12;Q5JR07;C9JNR4;C9JX21;Q5JR05	Transforming protein RhoA	RHOA;ARHA;RHOC	21.768	5	0.141929	-0.792589	20.843	21.7351	21.0112	20.0104	20.3821	20.819
A0A024RB09;P61020;Q6FI54;P61020-2	Ras-related protein Rab-5B	RAB5B	23.707	2	0.270131	-0.797971	16.8422	18.9305	17.6867	16.3968	17.6729	16.9958
F5H442;Q99816;Q99816-2;D3DQY6	Tumor susceptibility gene 101 protein	TSG101	40.917	10	0.16535	-0.80242	19.7677	20.8983	20.0801	19.0909	20.0201	19.2279
F8VP50;Q53FB6;P05091	Aldehyde dehydrogenase, mitochondrial	ALDH2	28.259	2	0.356783	-0.802435	14.2845	15.1285	14.9801	15.0072	14.7845	12.194
B0YJ88;P35241;P35241-5;B7Z2S7;P35241-4;Q6PKD3;Q05CU6	Radixin	RDX	68.563	8	0.0937908	-0.803567	18.273	18.2541	17.8001	17.4527	17.2326	17.2312
Q9Y490	Talin-1	TLN1	269.76	48	0.420218	-0.809575	17.2714	20.621	19.0614	17.0945	19.1374	18.2932
Q9P2B2	Prostaglandin F2 receptor negative regulator	PTGFRN	98.555	13	0.247535	-0.821088	19.7286	17.8138	18.421	18.2084	17.0619	18.2298
P61026;Q53T70	Ras-related protein Rab-10	RAB10	22.541	5	0.266307	-0.821295	18.0164	19.8451	19.311	17.2558	18.6933	18.7595
A8K4T6;Q16401-2;Q16401;F2Z3J2	26S proteasome non-ATPase regulatory subunit 5	PSMD5	56.223	2	0.378352	-0.826682	12.1536	14.5802	12.5604	11.0748	13.5531	12.1863
A7E2Y5;O75165;B3KN02	DnaJ homolog subfamily C member 13	DNAJC13	254.45	6	0.399576	-0.82879	12.4871	14.0149	12.1686	12.7849	13.2119	10.1874
D3DVQ1;O95202	LETM1 and EF-hand domain-containing protein 1, mitochondrial	LETM1	63.54	3	0.190472	-0.832282	14.1092	12.5153	12.6097	12.6163	11.9597	12.1613
A0A087WY55;Q9NP79;Q9C063;Q5TGM0;Q9NP79-2	Vacuolar protein sorting-associated protein VTA1 homolog	VTA1	31.102	4	0.0929812	-0.832452	18.7553	19.4948	19.2109	18.2744	18.2609	18.4284
Q4VCS5;E7ERM3;A6NP16;A2BDD9;Q4VCS5-2	Angiomotin	AMOT	118.08	10	0.34165	-0.842166	18.0427	16.0935	15.9656	16.3327	14.5127	16.7298
B8ZZG1;A0A024RA25;Q9NZW5;C9J4Q3	MAGUK p55 subfamily member 6	MPP6	48.757	4	0.0928975	-0.846018	16.7837	16.1252	16.7493	15.5723	15.6073	15.9404
B2R6K4;A0A024R056;P62873-2;P62873;F6UT28;B1AKQ8;F6X3N5	Guanine nucleotide-binding protein G(I)/G(S)/G(T) subunit beta-1	GNB1	37.301	9	0.170959	-0.85525	22.1787	23.1643	22.8841	21.2807	21.6439	22.7368
Q86SV6;O75487-2;O75487	Glypican-4;Secreted glypican-4	GPC4	61.675	3	0.280507	-0.859431	15.8955	15.792	16.8343	16.7995	14.4016	14.7422
A0A024R1T5;P09543-2;P09543;B4DFN6	2,3-cyclic-nucleotide 3-phosphodiesterase	CNP	45.098	7	0.0673695	-0.859595	18.6076	18.5867	18.4221	17.7527	17.6121	17.6729
A0A193DRS0;A0A0A8JCD0;Q59GR1;O15118;A0A0S2A5C8;K7EQ23;O15118-2	Niemann-Pick C1 protein	NPC1	142.15	3	0.247692	-0.860759	15.9173	16.5662	15.3146	15.7069	15.7192	13.7898
A0A024RAG3;P11234;P11234-3;P11234-2;B4E364;C9J6B1	Ras-related protein Ral-B	RALB	23.408	2	0.145847	-0.863871	15.711	17.0049	16.8805	15.2664	15.7424	15.9959
A0A024QZN4;V9HWK2;P18206-2;P18206;B3KXA2;B4E3Q9;Q5JQ13	Vinculin	VCL;HEL114	116.72	23	0.367739	-0.874413	18.0021	20.9698	19.7996	17.7279	19.9414	18.479
Q9P265;Q96IB4	Disco-interacting protein 2 homolog B	DIP2B	171.49	8	0.0649337	-0.876484	15.1076	15.4078	15.2779	14.4711	14.3735	14.3192
P31946-2	14-3-3 protein beta/alpha;14-3-3 protein beta/alpha, N-terminally processed	YWHAB	27.85	7	0.0882152	-0.876977	20.5214	20.9401	20.2652	19.9827	19.7524	19.3606
A0A024R6B5;P54652;B3KUS2	Heat shock-related 70 kDa protein 2	HSPA2	70.02	2	0.349118	-0.88673	14.3766	14.5682	14.0961	12.6743	15.5124	12.194
A0A0S2Z3H8;P63092;P63092-4;Q5JWF2;B0AZR9;A0A0S2Z3S5;Q14455;P63092-3;P63092-2;Q5JWF2-2;Q5FWY2;O60726	Guanine nucleotide-binding protein G(s) subunit alpha isoforms short;Guanine nucleotide-binding protein G(s) subunit alpha isoforms XLas	GNAS;GSA	45.664	10	0.0759736	-0.887995	20.0974	20.1226	19.7385	19.3117	19.2378	18.7451
P55196-1;G1UI22;A8MQ02;J3KN01;P55196-2;P55196-3;P55196;P55196-5;Q5TIG5;P55196-6	Afadin	MLLT4	205.6	7	0.152577	-0.899314	14.0095	13.8177	13.8827	13.7805	13.2233	12.0082
A0A024RAE4;B4E1U9;P60953;A0A024R9T1;B7ZAY4;B4DMH5;Q5JYX0;Q9UJM1;A0A024RAE6;P60953-1	Cell division control protein 42 homolog	CDC42;hCG_39634	21.258	4	0.250541	-0.908987	19.6464	21.0232	20.9322	18.4555	19.6412	20.7782
H3BMH2;H3BSC1;A0A024R5Z8;P62491-2;Q15907-2;P62491;Q15907;B4DMN1	Ras-related protein Rab-11A;Ras-related protein Rab-11B	RAB11A;RAB11B	17.668	9	0.183971	-0.919526	22.1851	24.0463	22.6591	21.5161	22.5891	22.0268
G9FP35;A0A024R240;P50148;B1AM21	Guanine nucleotide-binding protein G(q) subunit alpha	GNAQ	42.111	5	0.110664	-0.92738	18.6738	19.7845	19.0091	17.6961	18.5275	18.4616
A0A088QF11;A0A088QCU6;A0A024R798;A0A024R7D2;Q8IWA5-3;Q8IWA5;Q8IWA5-2;B3KX31	Choline transporter-like protein 2	SLC44A2	79.907	5	0.308528	-0.93001	15.8319	18.048	17.5187	14.7465	17.0274	16.8347
B2R6A3;O14745;J3QRP6;B3KSV9;O14745-2	Na(+)/H(+) exchange regulatory cofactor NHE-RF;Na(+)/H(+) exchange regulatory cofactor NHE-RF1	SLC9A3R1	38.898	5	0.107465	-0.934497	17.8573	16.925	16.8802	16.7966	15.8586	16.2038
Q9NZZ3;Q9NZZ3-2	Charged multivesicular body protein 5	CHMP5	24.57	3	0.147228	-0.937959	17.0585	18.4124	18.4205	17.0857	17.5471	16.4448
P53990-2;H3BQF7;H3BMU1;H3BUI0;A8K5S3;P53990-3;P53990;P53990-4;B4DHF3;F5GXM3;B4DLP1;H3BRE2;B4DM80;P53990-5	IST1 homolog	IST1	36.622	7	0.112046	-0.953068	20.1991	19.3959	19.084	19.1876	18.1088	18.5234
P68366-2;P68366	Tubulin alpha-4A chain	TUBA4A	48.328	4	0.236505	-0.956378	19.9525	22.4108	21.146	19.5166	20.9697	20.1538
Q15286;F5H157	Ras-related protein Rab-35	RAB35	23.025	5	0.108032	-0.957314	18.7564	19.2665	18.4643	17.2017	17.8913	18.5222
A0A024RAI1;P61158;B4DT29;B4DXW1;Q59FV6;B4DTI0	Actin-related protein 3	ACTR3	47.371	4	0.096803	-0.96228	16.6445	17.2433	17.1443	15.3271	16.2933	16.5249
Q86UX7-2;Q86UX7;F5H1C6	Fermitin family homolog 3	FERMT3	75.429	5	0.366999	-0.964221	15.8978	19.5262	18.3317	16.0794	18.0415	16.7421
A0A024R1K7;Q04917;B2R6N6;Q9H4N8	14-3-3 protein eta	YWHAH	28.218	6	0.114396	-0.97297	19.7433	20.4466	19.386	19.3096	19.2081	18.1394
P46939;P46939-2;P46939-4	Utrophin	UTRN	394.46	3	0.196459	-0.973161	11.3257	13.4055	12.6164	12.2935	10.9462	11.1885
V9HW98;P62258;G9K389;G9K388;P62258-2;B7ZA86	14-3-3 protein epsilon	HEL2;YWHAE;YWHAE/FAM22B fusion;YWHAE/FAM22A fusion	29.174	18	0.0695814	-0.975064	23.1736	23.6477	23.2255	22.5967	22.6734	21.8515
A0A024R1D9;A0A024R1I0;A0A024R1F6;A0A024R1J9;A0A024R1J8;B7Z4B6;P35240-4;P35240-6;P35240-5;P35240-8;P35240-3;P35240;P35240-2;P35240-10	Merlin	NF2	59.095	2	0.220992	-0.977766	16.4449	15.4525	15.2068	14.4016	13.6805	16.0888
A8K0T9;A0A024R0E5;P52907	F-actin-capping protein subunit alpha-1	CAPZA1	32.908	4	0.0820155	-0.985909	18.6771	19.4942	18.8281	18.1293	18.4296	17.4829
Q549N0;Q9Y281;Q9Y281-3	Cofilin-2	CFL2	18.736	3	0.290747	-0.99662	18.4826	16.7062	17.5879	18.317	15.3418	16.128
B2R6F5;O75695	Protein XRP2	RP2	39.625	4	0.0484455	-0.997732	17.9222	17.9788	17.7924	17.0553	17.0977	16.5472
F5GYN4;Q659F9;J3KR44;F5GYJ8;B4DPD5;Q96FW1;F5H6Q1;F5H3F0;B4E053;B3KUV5;Q96FW1-2	Ubiquitin thioesterase OTUB1	OTUB1;DKFZp564E242	28.05	4	0.216557	-1.00001	17.1649	17.3715	17.1605	17.2419	16.8429	14.6121
Q5JQ44;P61225	Ras-related protein Rap-2b	DKFZp547A0616;RAP2B	20.294	2	0.304558	-1.0148	15.6571	17.7043	16.8118	13.8759	16.6005	16.6523
C9JJ47;B4DFM1;A0A087WY71;E9PFW3;B4DNB9;Q96CW1-2;Q96CW1;C9JJD3;C9JPV8;C9JTK4;C9JGT8;B4DTI4;B7Z4N2;B4DJB1;B4E304	AP-2 complex subunit mu	AP2M1	28.791	2	0.225347	-1.02365	14.811	15.0365	14.9391	15.0412	14.4806	12.194
D0PNI1;P63104;E7EX29;B0AZS6;E7ESK7;P63104-2	14-3-3 protein zeta/delta	YWHAZ	27.745	11	0.0964231	-1.03439	22.4093	23.7721	22.3826	21.6277	22.1356	21.6976
A0A024R1X3;Q9BRG1;K7ENE3;K7EKV4	Vacuolar protein-sorting-associated protein 25	VPS25	20.747	2	0.395308	-1.04713	14.4332	15.8915	17.6526	13.2429	14.6099	16.9831
V9HWF0;A0A0A0MTH3;Q13418;Q13418-2;Q13418-3	Integrin-linked protein kinase	HEL-S-28;ILK	51.419	8	0.245559	-1.04948	16.0602	18.7138	17.1016	15.1556	17.1025	16.469
Q02241	Kinesin-like protein KIF23	KIF23	110.06	11	0.0738831	-1.04955	18.0893	17.7067	17.8109	17.5786	16.287	16.5927
B2R7T8;P47756-2;P47756;B1AK85;B1AK87;B1AK88;B4DWA6	F-actin-capping protein subunit beta	CAPZB	30.656	6	0.0750867	-1.05553	18.4724	19.3191	18.2522	17.1229	18.006	17.7481
A8KAH9;P62834;Q5U0C3;A0A075B6Q0	Ras-related protein Rap-1A	RAP1A	20.987	3	0.159771	-1.05655	17.6508	19.3728	18.9947	16.6658	17.8646	18.3183
A0A024R663;Q86UP2-2;Q86UP2-3;Q86UP2-4;Q86UP2;G3V5G2;G3V4Y7	Kinectin	KTN1	156.27	2	0.0881387	-1.05682	13.3262	14.2439	14.4345	12.2935	13.3619	13.1787
A0A024RBA9;Q9UL25;Q96GX3	Ras-related protein Rab-21	RAB21	24.347	6	0.169946	-1.08408	18.7016	20.7136	19.344	17.605	19.3437	18.5582
B4DXN3;F8VUA2;F8VVT7;Q9HD42	Charged multivesicular body protein 1a	CHMP1A	15.301	2	0.0364397	-1.08968	19.2244	19.1155	18.7493	17.6847	17.9676	18.1678
Q9NZN3	EH domain-containing protein 3	EHD3	60.886	3	0.265188	-1.11979	16.6781	19.7056	17.8739	15.8922	18.1874	16.8186
Q9Y5K6	CD2-associated protein	CD2AP	71.45	3	0.0585547	-1.12216	15.9528	16.0488	16.4314	15.5084	15.268	14.2902
D3DR37;Q53EZ4	Centrosomal protein of 55 kDa	CEP55	54.124	7	0.0494598	-1.1382	18.4763	18.2536	18.3197	17.5449	16.501	17.589
H0Y8E4;B4DK94;E9PH70;Q9ULH0-2;Q9ULH0-4;Q9ULH0;B4DGY1;Q9ULH0-3	Kinase D-interacting substrate of 220 kDa	KIDINS220	118.38	10	0.171171	-1.14888	16.0789	17.8935	16.482	15.3921	16.8993	14.7163
H9KV28;B4DVR3;A0RZB8;A0A140T8Z0;Q6URC4;A0A0G2JH68;O60610-2;O60610-3;O60610	Protein diaphanous homolog 1	DIAPH1	136.85	3	0.154514	-1.1535	12.1536	12.1666	14.5433	11.9623	11.6399	11.8007
B4DWC4;Q6FIC5;Q9Y696;Q9NVF8;B3KTR3	Chloride intracellular channel protein;Chloride intracellular channel protein 4	CLIC4	27.818	7	0.0614589	-1.16486	18.357	19.0137	18.2121	17.6985	17.7906	16.5992
F8WDD7;F8WCF6;A0A0A6YYG9;P59998;P59998-3;P59998-2;R4GN08;Q9H7Z5;H7C0A3;P59998-4	Actin-related protein 2/3 complex subunit 4	ARPC4;ARPC4-TTLL3	13.057	2	0.080189	-1.18577	19.0859	20.3815	19.3988	18.3044	19.1929	17.8116
Q9BUL8;C9J5C3;C9J363;C9J6F3	Programmed cell death protein 10	PDCD10	24.701	5	0.0507631	-1.18952	18.1932	19.239	18.8517	17.1957	18.1304	17.3892
V9HW04;P62140;C9J9S3;C9JP48	Serine/threonine-protein phosphatase;Serine/threonine-protein phosphatase PP1-beta catalytic subunit	HEL-S-80p;PPP1CB	37.186	2	0.364343	-1.19963	16.7777	17.5609	13.5227	15.7536	15.6141	12.8947
B4DQE1;Q5VT79;P13928;A0A087WUP0;B4DTB3;A0A087WTN9;A0A075B752;P13928-3;B4DTF2;P13928-2	Annexin;Annexin A8-like protein 2;Annexin A8	ANXA8L2;ANXA8;ANXA8L1	43.855	4	0.41522	-1.20093	13.6003	17.9451	16.0431	12.2935	16.3878	15.3045
A8K2B4;A0A097PID1;A0A097PIC4;A0A0U1RRM6;Q8N8S7-3;Q8N8S7-2;Q8N8S7;Q6ZSB8;A0A075B6E5;A0A0U1RQP7;Q6ZT55	Protein enabled homolog	ENAH	63.996	2	0.301706	-1.20583	15.5152	15.1219	12.4334	14.9646	12.0907	12.3976
P04899;P04899-4;B3KX51;Q96C71;P04899-6;P04899-3;P04899-5;P04899-2;Q93020;B3KP24	Guanine nucleotide-binding protein G(i) subunit alpha-2	GNAI2;WUGSC:H_LUCA16.1	40.45	11	0.0602695	-1.21042	22.0122	23.269	22.2688	20.7346	21.7701	21.4142
A0A140VJF4;P53004	Biliverdin reductase A	BLVRA	33.428	3	0.192452	-1.21563	14.7217	15.646	15.5051	15.0143	15.0176	12.194
Q4VB86;Q1WWM3;Q59F12;P11171-4;P11171-3;P11171-2;P11171;Q4VB87;Q29RX4;P11171-6;P11171-5;P11171-7	Protein 4.1	EPB41	69.889	5	0.0928935	-1.22679	16.8218	18.6057	17.67	16.1633	17.2602	15.9936
P05771;P05771-2;Q59FI5;Q2TSD3;L7RSM7;A0A169TED2;P17252	Protein kinase C beta type;Protein kinase C;Protein kinase C alpha type	PRKCB;PRKCA	76.868	3	0.430791	-1.23608	12.1536	16.6125	15.5981	10.953	15.1526	14.5503
A0A024R7I3;P61006;P61006-2;Q59EP4;B4DMS1	Ras-related protein Rab-8A	RAB8A	23.668	3	0.249078	-1.23654	14.9236	17.421	15.8929	13.0372	16.2118	15.2789
B2RE34;A0A024R136;Q9H0H5;F8VRD2	Rac GTPase-activating protein 1	RACGAP1	70.968	7	0.0581587	-1.24026	18.7507	18.4629	18.0646	18.0784	16.9486	16.5304
A0A140VJU5;A0A087WW40;Q9Y371;Q9Y371-2	Endophilin-B1	SH3GLB1	40.796	3	0.0830218	-1.25146	16.3267	17.4834	16.4464	16.4078	15.461	14.6333
E5KNY5;P42704;B4DSR0	Leucine-rich PPR motif-containing protein, mitochondrial	LRPPRC	157.9	6	0.151429	-1.25335	14.1774	11.4112	12.6097	12.2382	11.0859	11.1142
Q5HY54;Q60FE6;Q60FE5;P21333-2;P21333;A6NDY9;A0A087WWY3;Q8TES4	Filamin-A	FLNA;FLJ00119	276.55	41	0.169101	-1.25684	18.3369	21.0951	19.59	17.6077	19.3722	18.2716
Q5JVE7;P00742	Coagulation factor X;Factor X light chain;Factor X heavy chain;Activated factor Xa heavy chain	F10	54.731	3	0.261419	-1.2591	19.1446	21.8507	18.8691	17.9548	20.3374	17.7949
P35251-2;P35251;H0Y8U4;Q14756	Replication factor C subunit 1	RFC1;LLDBP	128.18	2	0.0468766	-1.26422	12.1536	12.5153	12.6097	10.869	10.597	12.02
B4DTQ6;Q70J99;Q70J99-3;K7EQ37;K7EN81;Q70J99-2	Protein unc-13 homolog D	UNC13D	106.5	2	0.284859	-1.26654	12.6089	16.1029	14.492	12.2935	14.9168	12.194
B4DMZ0;B4DP99;Q53EL3;B5BU52;B2R6Q4;A8K3B6;P41240	Non-specific protein-tyrosine kinase;Tyrosine-protein kinase CSK	CSK	42.097	2	0.173519	-1.27985	15.8144	16.5993	16.0768	12.9755	16.0048	15.6708
Q5VZR0;D3DRP5;Q9H4G4;A0A087WUM5;B4DQC5	Golgi-associated plant pathogenesis-related protein 1	GLIPR2;C9orf19	14.213	2	0.0555491	-1.28215	19.4083	20.4246	19.4432	17.6704	18.8322	18.927
V9HWC2;Q99497;K7EN27;K7ELW0	Protein deglycase DJ-1	HEL-S-67p;PARK7	19.891	2	0.284067	-1.28779	14.7689	16.8003	16.2467	15.8471	15.9114	12.194
H7BXY6;Q8NG11-3;Q8NG11-2;Q8NG11;A6NEP9	Tetraspanin;Tetraspanin-14	TSPAN14	23.918	2	0.0905927	-1.28823	18.5464	20.3611	18.9264	17.1887	18.6033	18.1772
P27348;E9PG15;B4DMT8;Q53S41;B4DY04	14-3-3 protein theta	YWHAQ	27.764	6	0.0685484	-1.30548	20.5071	20.0428	21.9906	19.6282	19.2264	19.7695
A0A087WZB5;Q9HBI1-3;Q9HBI1;Q9HBI1-2;B0QYP8	Beta-parvin	PARVB	33.257	4	0.285469	-1.30734	17.4329	20.5164	18.9568	15.5504	19.1059	18.3278
P17301	Integrin alpha-2	ITGA2	129.29	4	0.145222	-1.31548	16.4248	17.424	15.908	13.6981	16.3853	15.7268
O15020-2;O15020;A4QPE4	Spectrin beta chain, non-erythrocytic 2	SPTBN2	268.31	2	0.729614	-1.31905	12.1536	21.6252	20.4882	9.22341	20.5048	20.5817
A0A024RB87;P61224-3;P61224;E7ESV4;A0A0J9YXB3;F5H7Y6;P61224-2;A6NIZ1;F5GX62;Q9BXV4;P61224-4;F5H823;B7ZB78;F5GZG1;F5H6R7;F5H004;B7ZAY2	Ras-related protein Rap-1b;Ras-related protein Rap-1b-like protein	RAP1B	20.825	10	0.131774	-1.32305	23.1136	25.4061	24.3878	21.8207	23.636	23.4816
B3KVN0;Q0P512;Q59GX2;P11166;B4DKW1;B4DDR6	Solute carrier family 2, facilitated glucose transporter member 1	SLC2A1	45.869	6	0.178077	-1.33162	20.8563	23.3398	21.7194	19.4004	22.0232	20.497
Q969P0;Q969P0-3;C9J8Z4	Immunoglobulin superfamily member 8	IGSF8	65.033	8	0.043254	-1.33395	19.2652	18.3343	18.943	17.9114	16.699	17.9302
A1L0W4;A0A024R7B7;Q16543;K7EL68;Q6FG59	Hsp90 co-chaperone Cdc37;Hsp90 co-chaperone Cdc37, N-terminally processed	MBD5;CDC37	12.191	5	0.151272	-1.3382	17.6515	17.1031	17.6301	17.4462	14.284	16.6399
B4E2V5;B4DZK8;A0A024R882;P27105	Erythrocyte band 7 integral membrane protein	STOM	25.964	10	0.275813	-1.34186	20.9696	24.5921	22.9738	19.8924	23.1375	21.4799
Q5SRT3;Q53FB0;O00299	Chloride intracellular channel protein;Chloride intracellular channel protein 1	CLIC1	26.922	9	0.0261871	-1.36281	20.1961	21.2237	20.5847	19.4769	19.5766	18.8627
Q14669-4;Q14669;Q14669-2;Q14669-3	E3 ubiquitin-protein ligase TRIP12	TRIP12	192.07	3	0.0555826	-1.3665	12.1536	12.5153	11.4534	11.2287	9.67384	11.1202
B7ZKY2;O14936-3;O14936-4;O14936-6;O14936-2;O14936;Q5JS74	Peripheral plasma membrane protein CASK	CASK	102.08	3	0.0291417	-1.36886	15.8914	14.7627	15.2712	13.5321	13.9111	14.3754
L7UUZ7;P05106;B4DTY9;H3BM21;P05106-2;P05106-3	Integrin beta;Integrin beta-3	ITGB3	86.998	18	0.134742	-1.37035	20.0689	22.4067	21.2332	18.7944	21.03	19.7733
E7ENV7;Q86YQ8;Q8N7E6	Copine-8	CPNE8	62.233	8	0.0294333	-1.38909	17.743	18.1963	18.241	17.3883	16.5986	16.0262
A0A0C4DGG1;B4DUI2;D3DQR0;Q9UKS6;E9PJ33;E9PJ75;E9PNM9;B4DV80;E9PIY1	Protein kinase C and casein kinase substrate in neurons protein 3	PACSIN3	46.494	2	0.0819222	-1.4042	15.5666	14.4674	15.943	12.7188	14.3943	14.6515
H7BXK9;Q9NP58-4;Q9NP58;A0A024R436	ATP-binding cassette sub-family B member 6, mitochondrial	ABCB6	77.434	3	0.0865963	-1.4266	15.5075	17.0619	15.7592	14.1618	15.9275	13.9594
V9HWC0;P26038;Q6PJT4	Moesin	HEL70;MSN	67.819	20	0.0240909	-1.43923	21.1485	22.185	21.4081	19.7331	20.6443	20.0465
E9PNW4;Q6FHM9;E9PR17;P13987;H0YET2	CD59 glycoprotein	CD59	11.985	2	0.337017	-1.44172	20.3893	20.3033	20.9341	19.8137	15.7573	21.7306
O00194;K7ES41	Ras-related protein Rab-27B	RAB27B	24.608	2	0.386195	-1.44616	13.8786	18.6509	17.0146	12.2935	17.0349	15.8772
O95782-2;O95782;B4DXJ6	AP-2 complex subunit alpha-1	AP2A1	105.36	4	0.155472	-1.47291	17.1125	19.0614	15.5614	15.8584	14.9658	16.4924
X6R433;A0A0A0MT22;P08575-2;P08575;B4E0V3;E9PKH0;M3ZCP1;B4DSZ5;A0A075B788;Q6PJK7	Protein-tyrosine-phosphatase;Receptor-type tyrosine-protein phosphatase C	PTPRC	131.13	4	0.356129	-1.49514	13.247	18.0114	16.561	11.9524	16.4261	14.9554
A0A024RCX8;Q9Y3C6	Peptidyl-prolyl cis-trans isomerase;Peptidyl-prolyl cis-trans isomerase-like 1	PPIL1	18.237	2	0.227205	-1.52872	16.481	15.638	16.9075	16.8957	15.3507	12.194
C9JIS1;C9JXA5;Q6FHM2;P62879;C9JZN1;E7EP32	Guanine nucleotide-binding protein G(I)/G(S)/G(T) subunit beta-2	GNB2	25.538	4	0.0221988	-1.53021	19.8332	21.1811	20.0718	19.0455	18.9842	18.4657
H3BUD9;H3BS49;H3BVH7;H3BN55;Q6IAS8;A2RU94;P51159-2;P51159;H3BU81;A0A0H4JC20	Ras-related protein Rab-27A	RAB27A	10.688	4	0.285047	-1.53106	17.3912	21.5503	20.1976	16.3041	20.2114	18.0304
B4DV28;Q96KP4-2;Q96KP4;J3KSS4;J3QRP4;J3QQN6;J3QR27;J3QLU1;J3QKQ0;J3QRD0;J3QRA8;J3QL02;J3KSV5;A0A087WYZ1;Q9NUV1;J3QKT2;Q9NW02;A0A024R382;B4DPF1	Cytosolic non-specific dipeptidase	CNDP2	51.501	2	0.133944	-1.53619	14.7366	15.2862	14.7402	14.2379	14.6425	11.274
P08514-3;P08514-2;P08514;B7Z8B0;B4DLU2;Q59FA8	Integrin alpha-IIb;Integrin alpha-IIb heavy chain;Integrin alpha-IIb light chain, form 1;Integrin alpha-IIb light chain, form 2	ITGA2B	103.22	2	0.314308	-1.55414	15.8827	20.1299	18.6886	14.32	18.9054	16.8134
Q6NZ44;B3KXC3;A0A024R525;Q6NS36;P02794;E9PQR3;E9PKM5;E9PRK8;E9PK45;G3V1D1;E9PKY7;G3V192;Q8TD27	Ferritin;Ferritin heavy chain;Ferritin heavy chain, N-terminally processed	FTH1	21.241	2	0.0165623	-1.56482	18.0133	18.5424	18.5704	16.117	17.3396	16.975
O94804	Serine/threonine-protein kinase 10	STK10	112.13	3	0.0369573	-1.57889	12.9893	14.6697	13.1292	12.4446	11.4129	12.194
B7Z589;B7Z3W8;P48067-2;P48067-3;P48067;B7Z9G8;B7Z3A9;J3KPA5;B7Z8W5	Transporter;Sodium- and chloride-dependent glycine transporter 1	SLC6A9	58.36	2	0.113051	-1.62265	16.6073	17.8283	16.4417	15.6156	16.8558	13.538
Q6ICN0;B3KR50;B0LPF3;P62993-2;P62993;J3KT38;J3QRL5	Growth factor receptor-bound protein 2	GRB2	25.148	3	0.229229	-1.74855	15.6231	17.8179	17.4872	16.4345	17.0541	12.194
B4DI81;Q53FJ6;P17302;B4DGM6;B4DN50;B4DMC9	Gap junction protein;Gap junction alpha-1 protein	GJA1	40.511	14	0.0693508	-1.9969	22.2607	20.9109	22.4033	20.051	18.0286	21.5046
Q86YB0;P51674-3;P51674-2;P51674;Q49AH3;D6R9D2	Neuronal membrane glycoprotein M6-a	GPM6A	31.209	2	0.198981	-2.09037	15.8681	19.1112	17.7263	12.2935	17.6018	16.5392
A0A0J9YXC7;P48059;P48059-4;P48059-2;P48059-5;P48059-3;B4DUX2;C9JF46;A0A0M3HER1;P0CW19-2;B3KNZ3	LIM and senescent cell antigen-like-containing domain protein 1	LIMS1	45.724	2	0.209648	-2.11687	16.1701	19.2467	18.1571	12.2935	17.8022	17.1277
Q5TZZ9;B5BU38;P04083	Annexin;Annexin A1	ANXA1	38.714	5	0.133605	-2.13368	17.2194	19.8929	18.3398	13.6362	18.0634	17.3515
B4E325;Q53F93;Q00013-2;Q00013-3;Q00013;C9J9J4	55 kDa erythrocyte membrane protein	MPP1	50.153	2	0.00134619	-2.20384	15.0213	14.973	15.1102	12.4833	12.773	13.2368
P16157-21;P16157-2;P16157-11;P16157-9;P16157-6;P16157-7;P16157-4;P16157-13;P16157-10;P16157-15;P16157-8;P16157-5;P16157-16;P16157-3;P16157;P16157-12;P16157-14;B3KX39;H0YBS0	Ankyrin-1	ANK1	208.24	6	0.125568	-2.22301	14.086	17.3186	14.9643	11.4497	15.7207	12.5295
B8ZZX6;A0A024RAD7;Q658P3-4;Q658P3-3;Q658P3;Q658P3-2	Metalloreductase STEAP3	STEAP3	50.628	2	0.016302	-2.27726	18.9268	19.3113	18.877	15.4206	18.1555	16.7073
Q9H7F0;A0A087WYY3;Q9H7F0-2	Probable cation-transporting ATPase 13A3	ATP13A3	138.04	2	0.00445831	-2.28592	13.6349	15.376	14.3179	12.2935	11.9836	12.194
Q96H20-2;Q96H20;H0Y8S5;D6RBI1;D6RJ86;D6RFY6	Vacuolar-sorting protein SNF8	SNF8	28.736	2	0.133424	-2.35727	17.6044	18.8584	16.676	16.1823	17.6907	12.194
Q5H9P2;P36383;K7ERH3	Gap junction gamma-1 protein	DKFZp686P0738;GJC1	29.701	2	0.0170557	-2.36563	16.6661	17.6033	18.1255	15.2343	13.7486	16.315
K7EIN1;K7ESN4;K7EIJ0;K7ENL2;A6NG10;K7EMC9;A0A024R8L1;Q969T9;K7EIK1;B4DFL8;B4DFG2;Q7Z511	WW domain-binding protein 2	WBP2	11.967	2	0.163464	-2.42873	17.3475	19.3367	18.609	18.0302	17.7829	12.194
H6VRG2		KRT1	66.065	24	0.0180984	-2.43619	22.9434	23.483	21.987	21.8993	19.9855	19.22
A0A0S2Z475;A0A0S2Z4A3;A0A0S2Z4T6;O76083-4;O76083-12;O76083-8;O76083-2;O76083-5;O76083-15;O76083;O76083-10;O76083-7;O76083-9;O76083-11;O76083-3;O76083-16;O76083-6;O76083-13;O76083-14	High affinity cGMP-specific 3,5-cyclic phosphodiesterase 9A	PDE9A	54.096	2	0.00905827	-2.77593	14.7802	16.7299	14.3687	11.8608	13.4963	12.194
Q9Y3E7-2;Q9Y3E7-4;Q9Y3E7;Q9Y3E7-3	Charged multivesicular body protein 3	CHMP3	17.326	2	0.0248746	-2.95287	17.696	19.1566	16.6814	12.8062	15.8798	15.9893
D3DSM4;D3DSM5;P39060-2;P39060-1;P39060;Q8NG19;H7BXV5;H7C457	Collagen alpha-1(XVIII) chain;Endostatin	COL18A1	135.51	7	0.0443952	-3.02738	17.0839	16.7451	17.3339	17.0844	12.8024	12.194
E9PJK1;E9PRJ8;H0YDL9;H0YDJ9;A0A024RCB7;E9PIF1;A6NMH8;P60033	Tetraspanin;CD81 antigen	CD81	17.963	3	0.141665	-4.06008	22.1718	23.0149	22.6502	22.0327	21.43	12.194
